# Supplementary material
Source: Research Square preprint supplement (doi:10.21203/rs.3.rs-9402989/v1)

### **Full set of BSMs**

Below, the aggregated Bodily Sensation Maps (BSMs) depicting distinct patterns of activation and deactivation across the 65 mental states employed in Study 1.

#### **Affection**

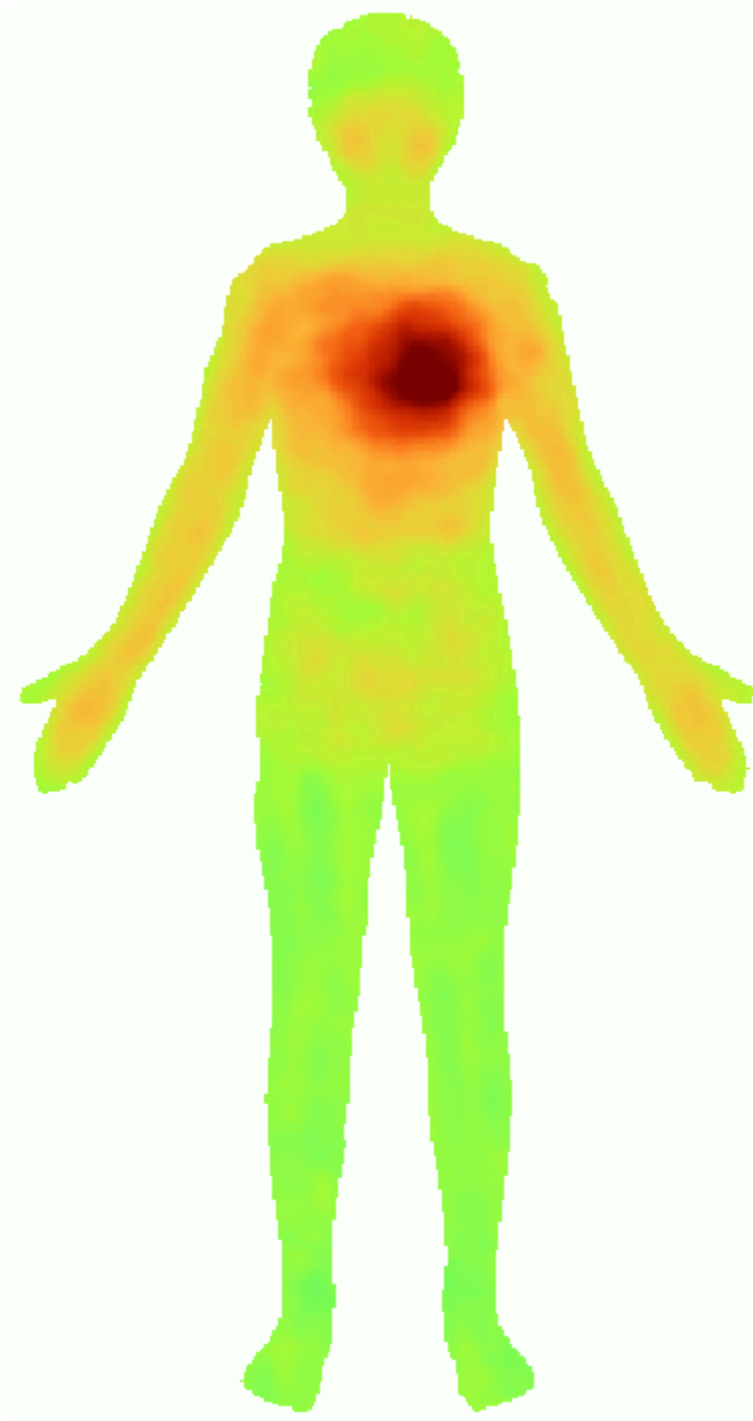

## Aggressiveness

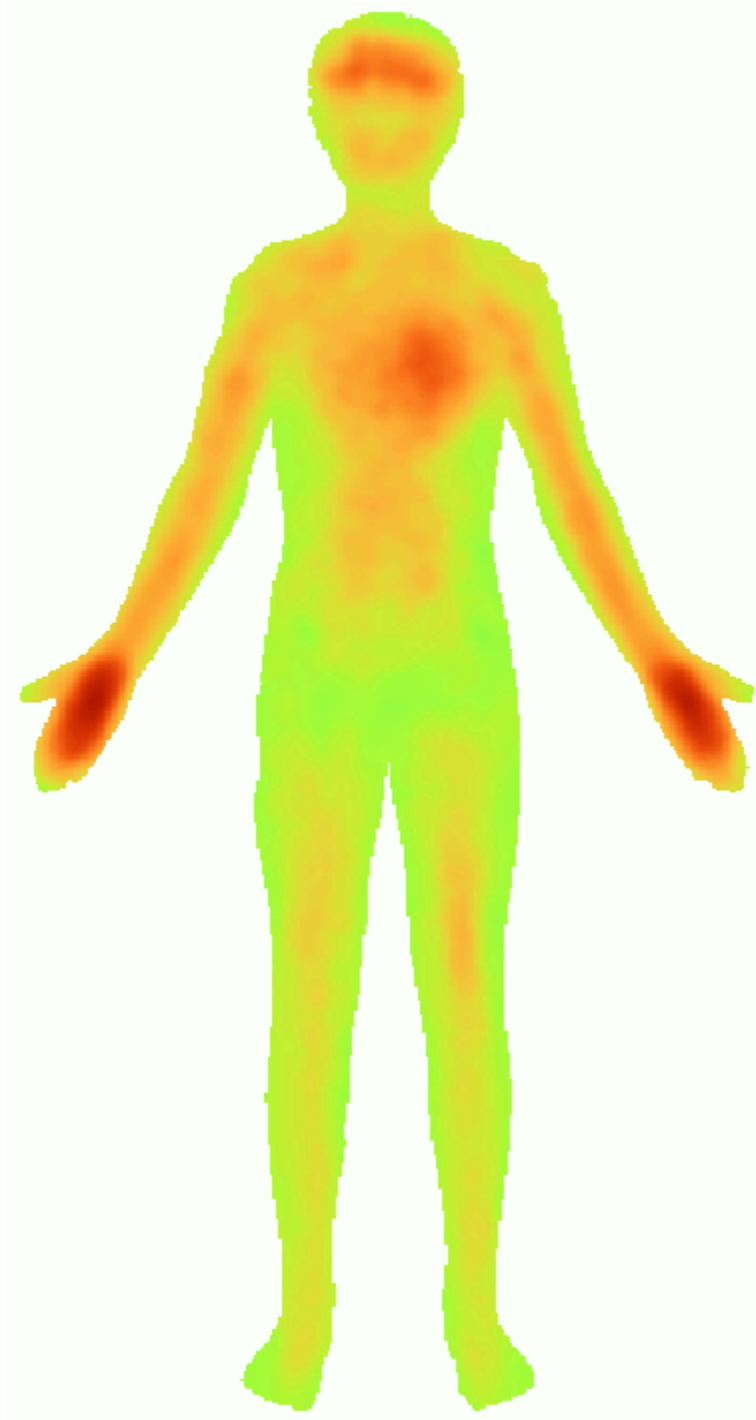

## Agitation

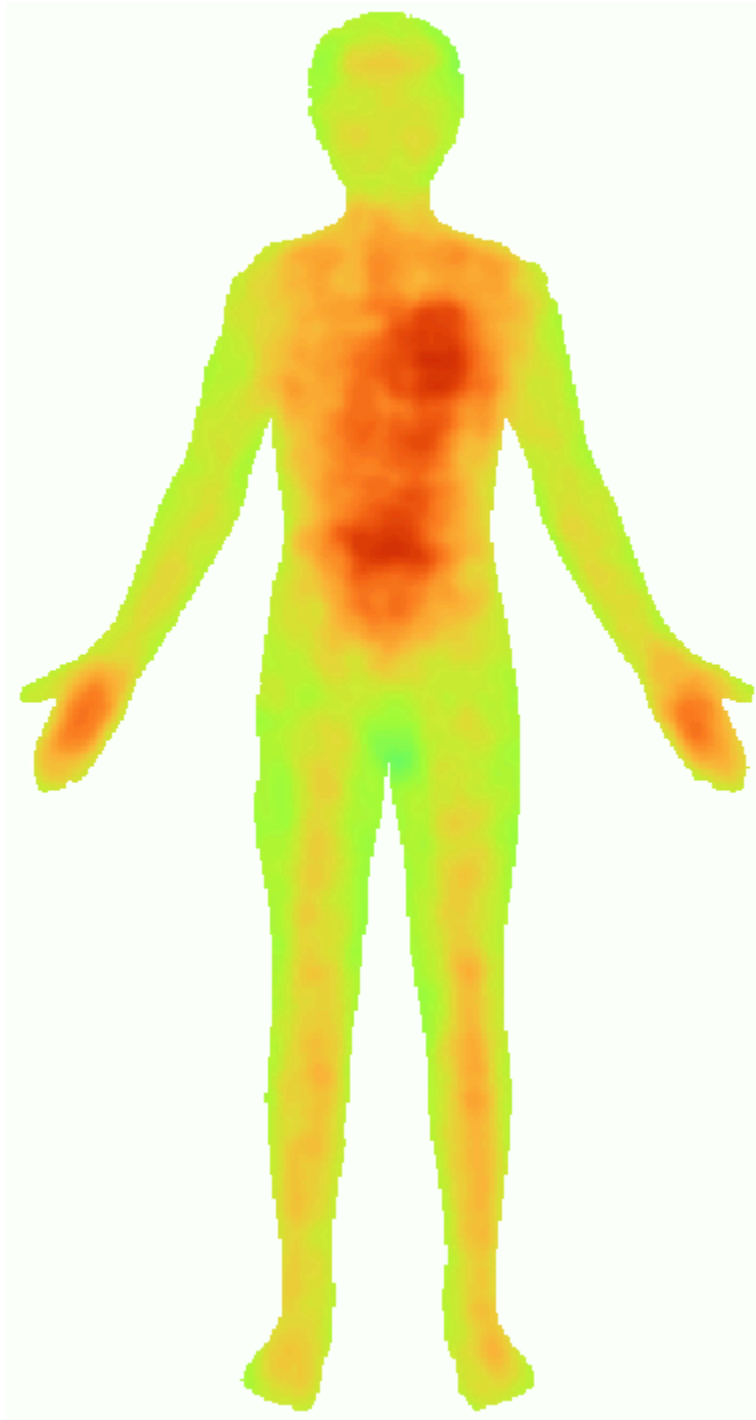

## Agony

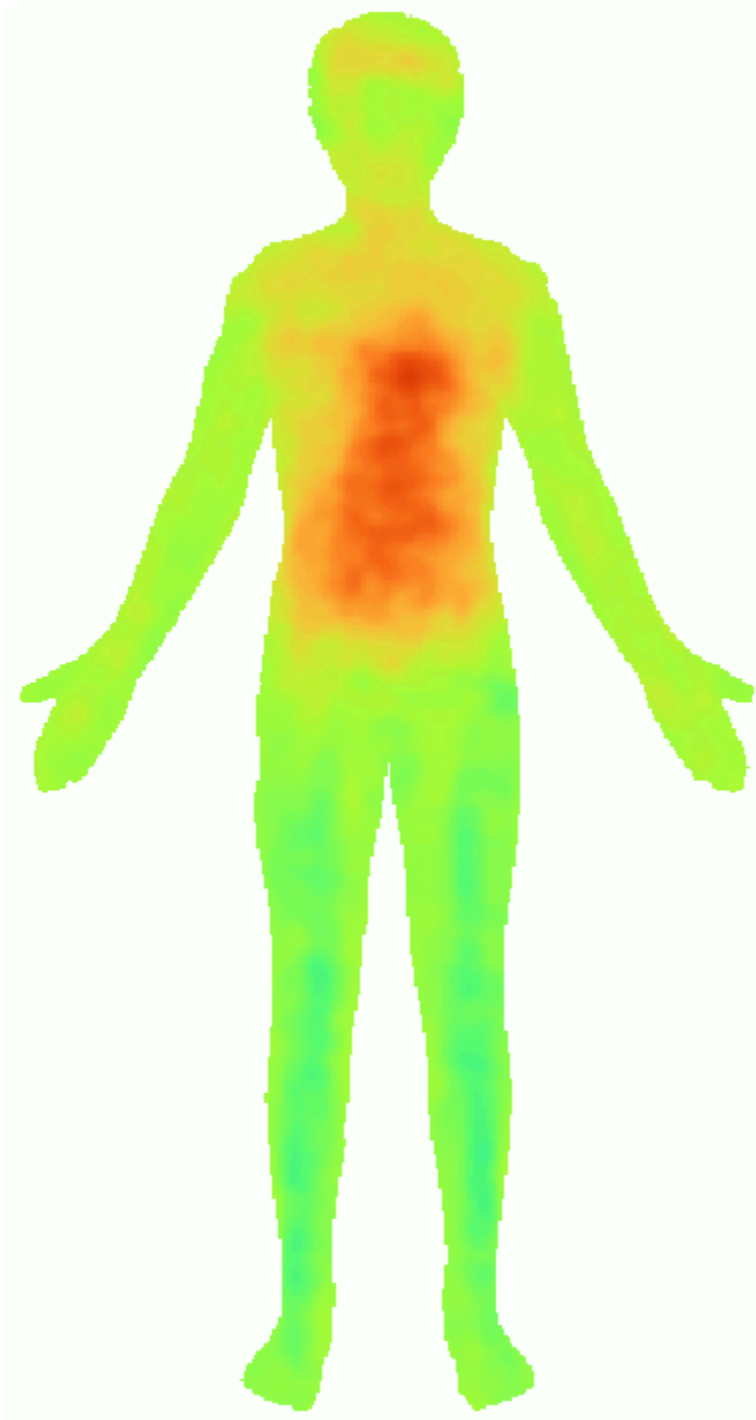

## Amusement

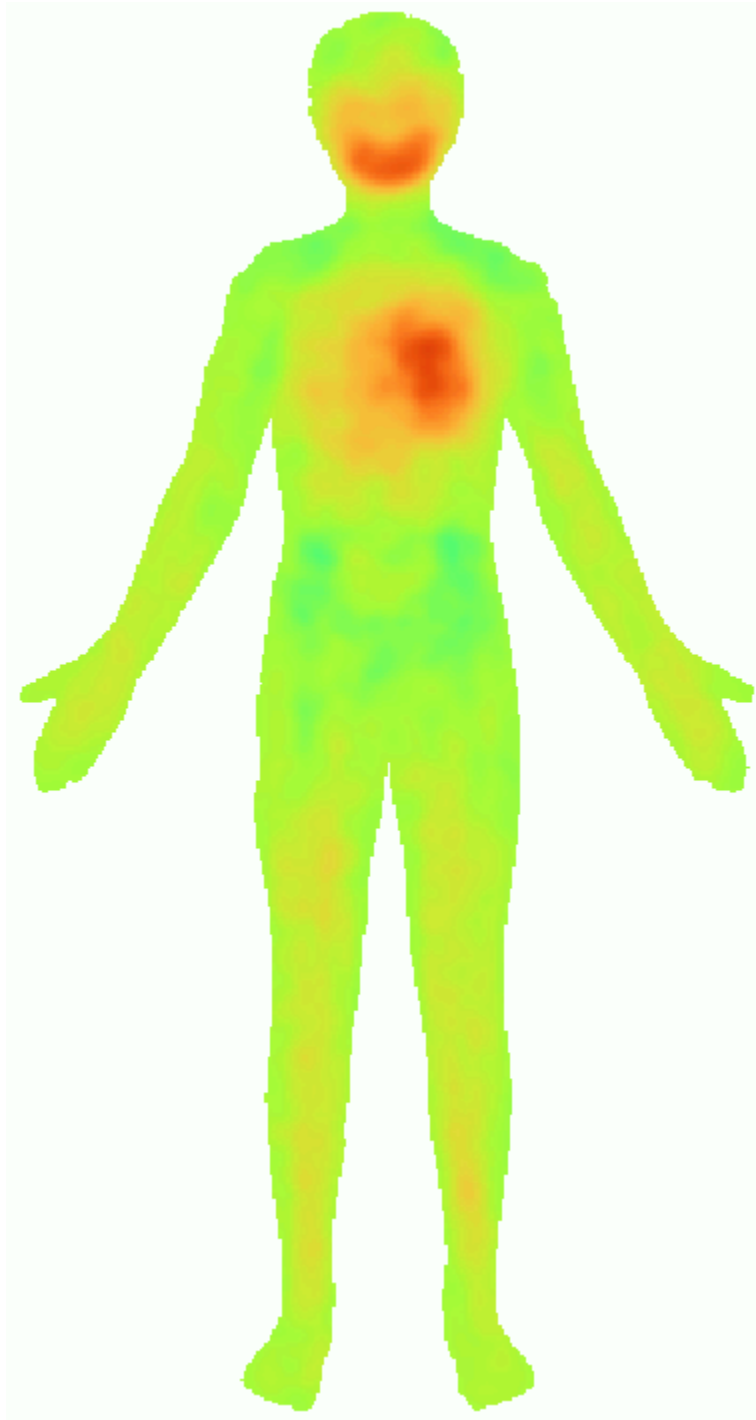

## Anger

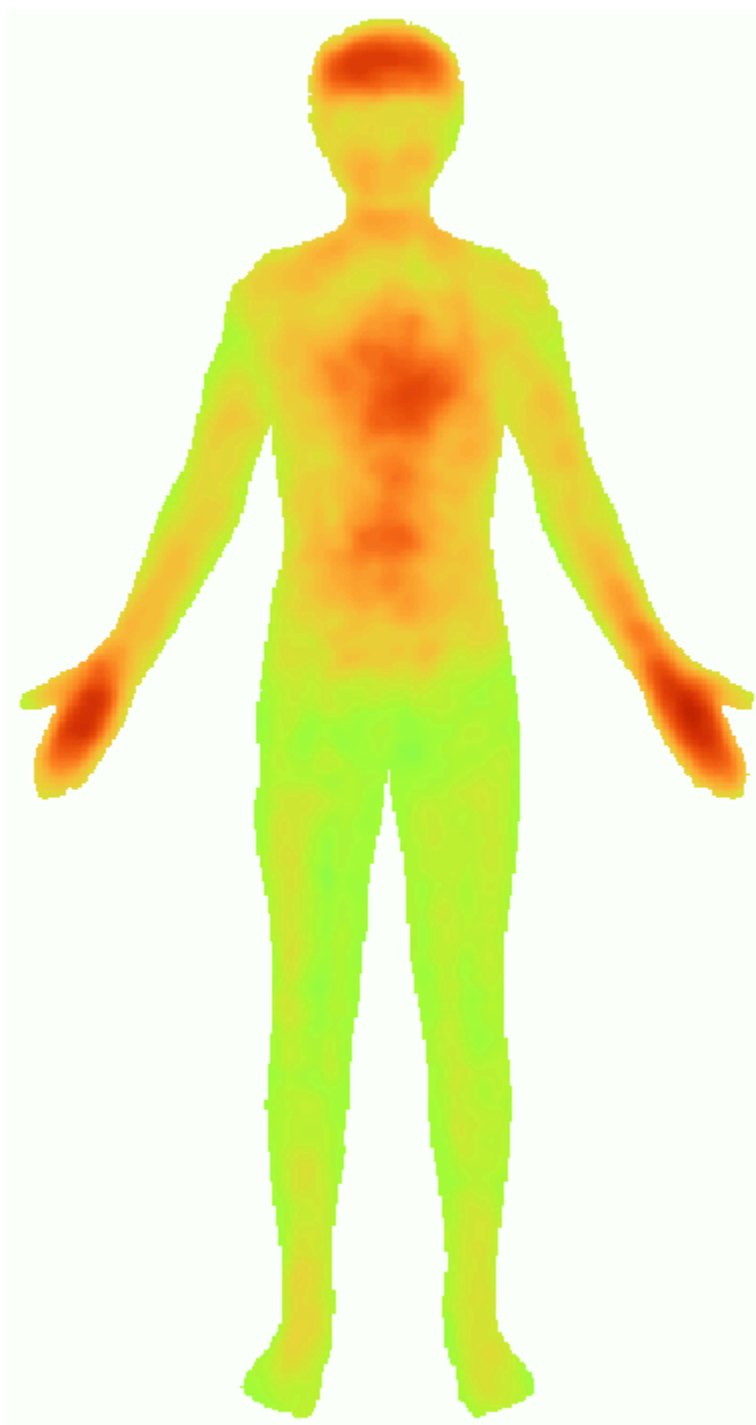

## Anxiety

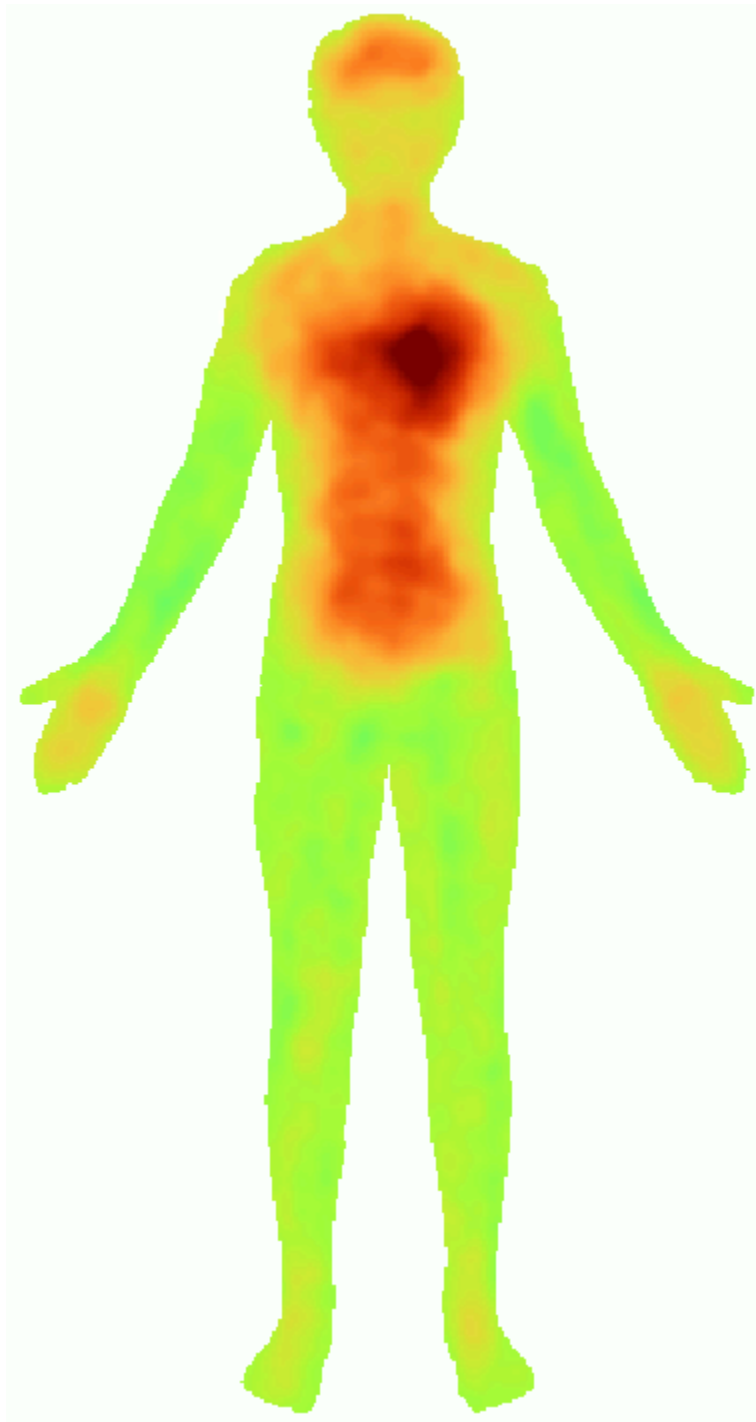

## Astonishment

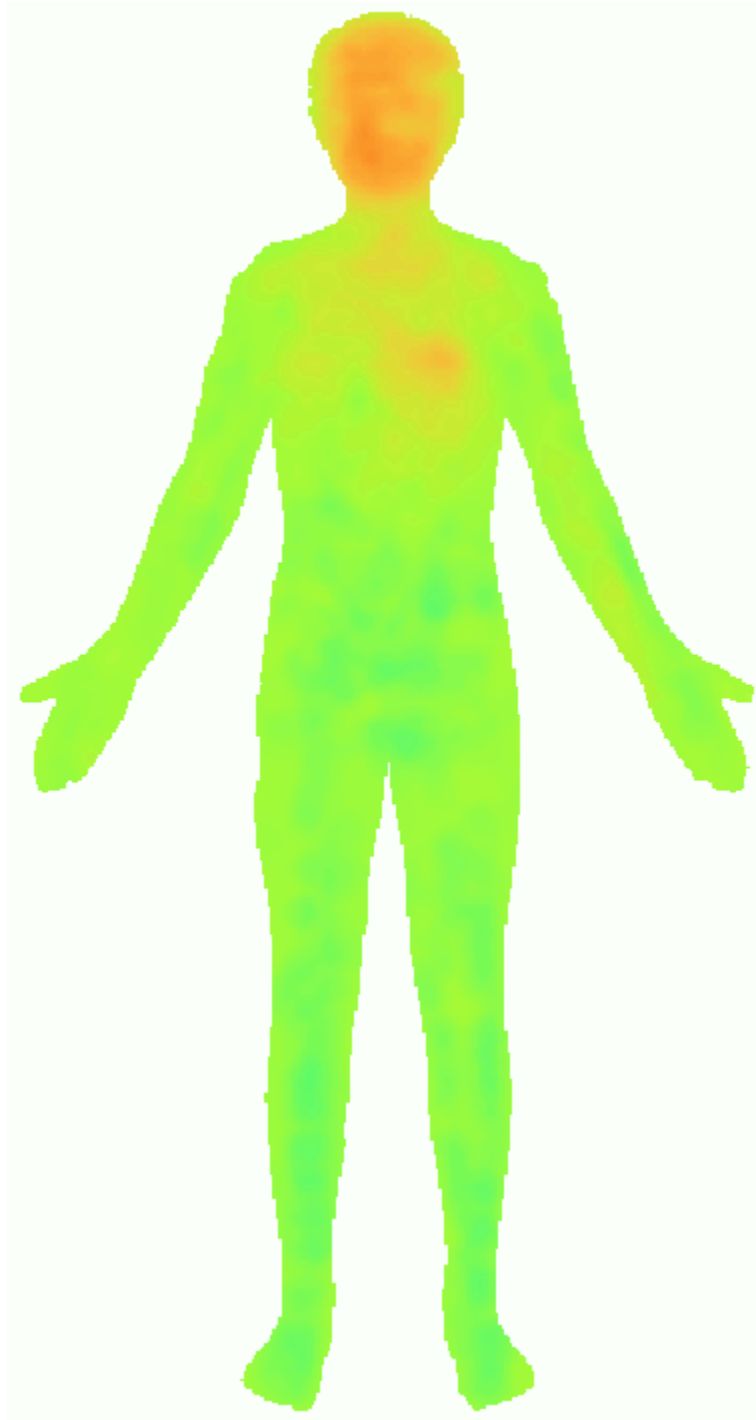

## Being touched

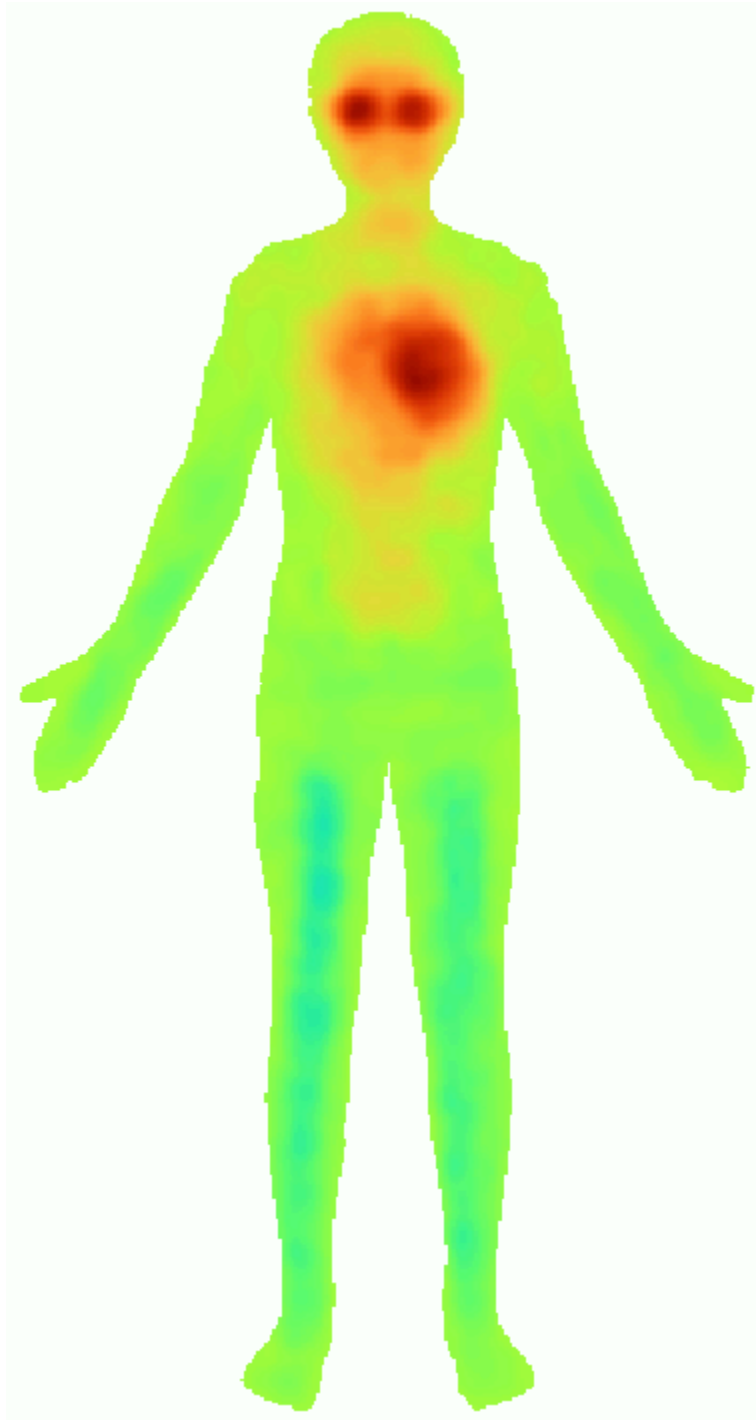

## Breathlessness

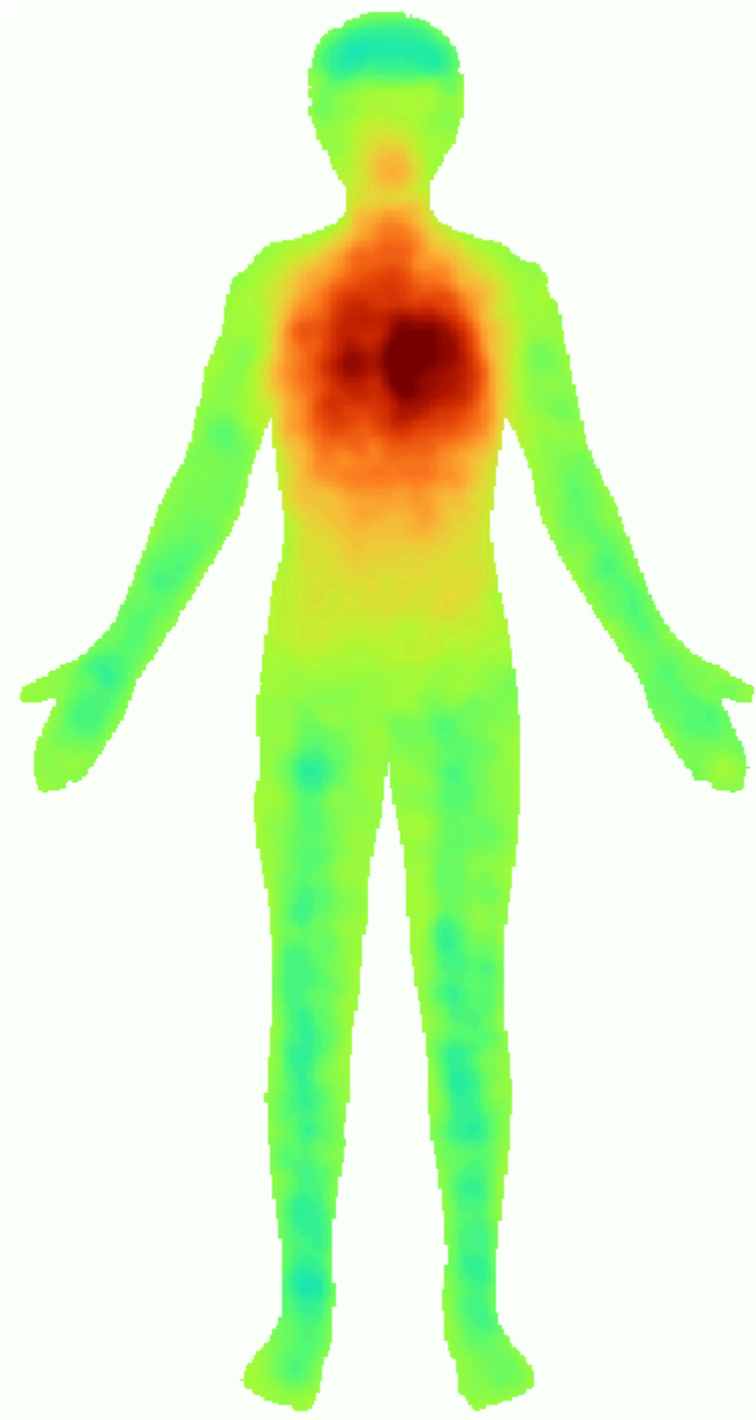

## Carelessness

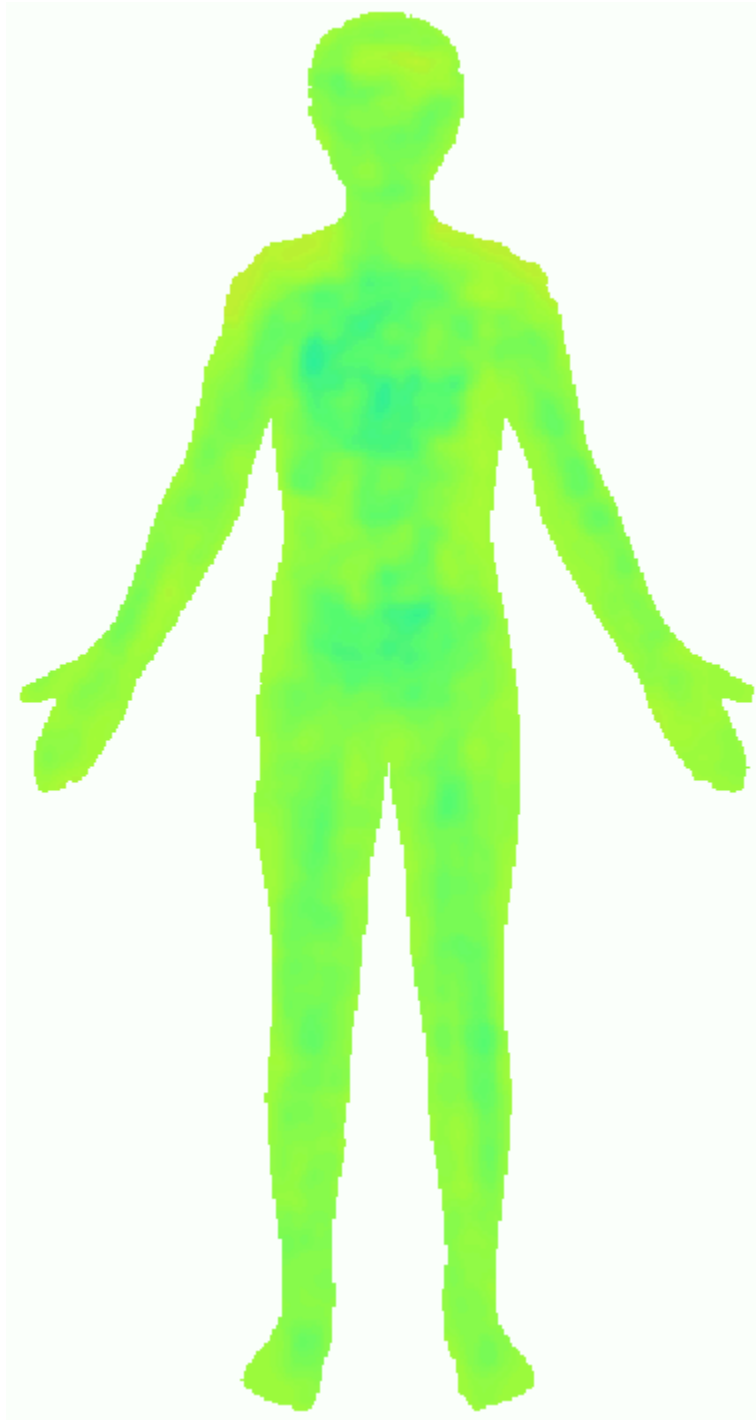

## Caution

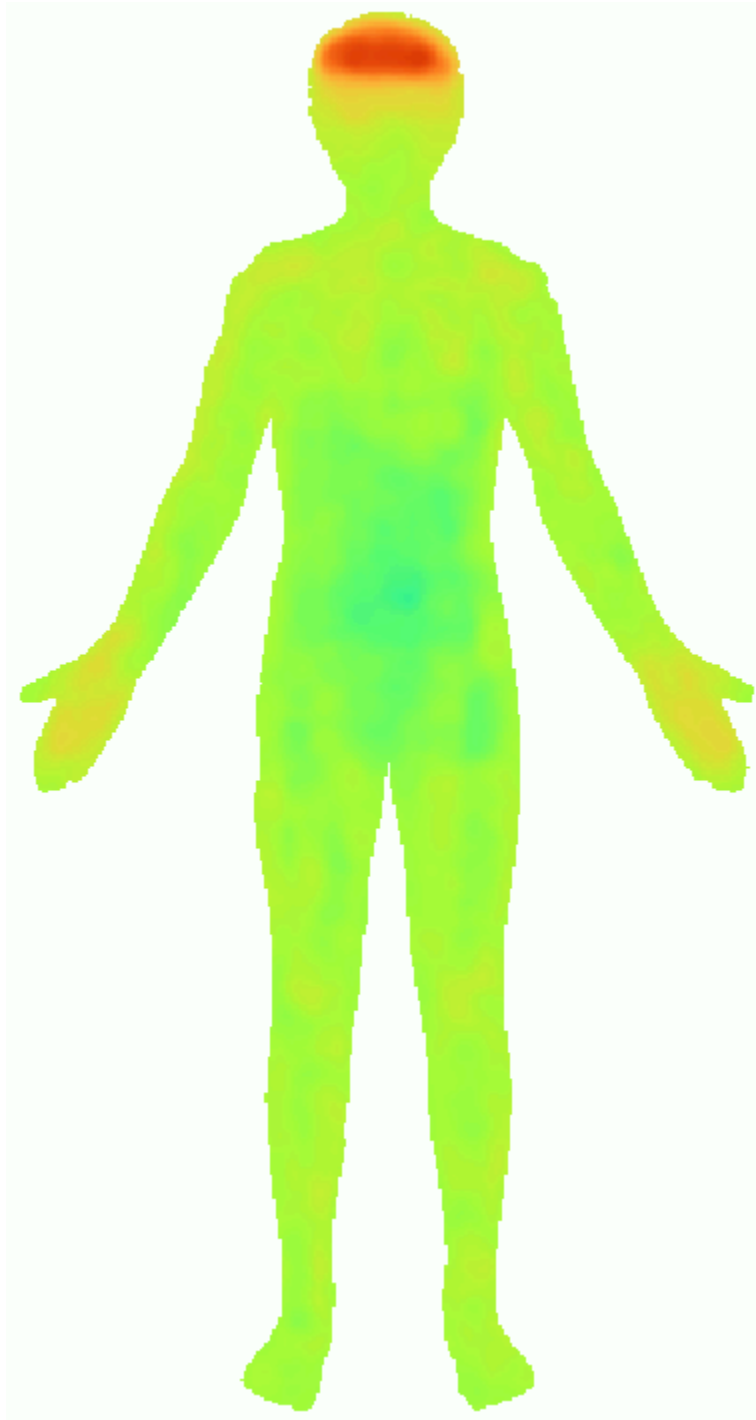

## Chastity

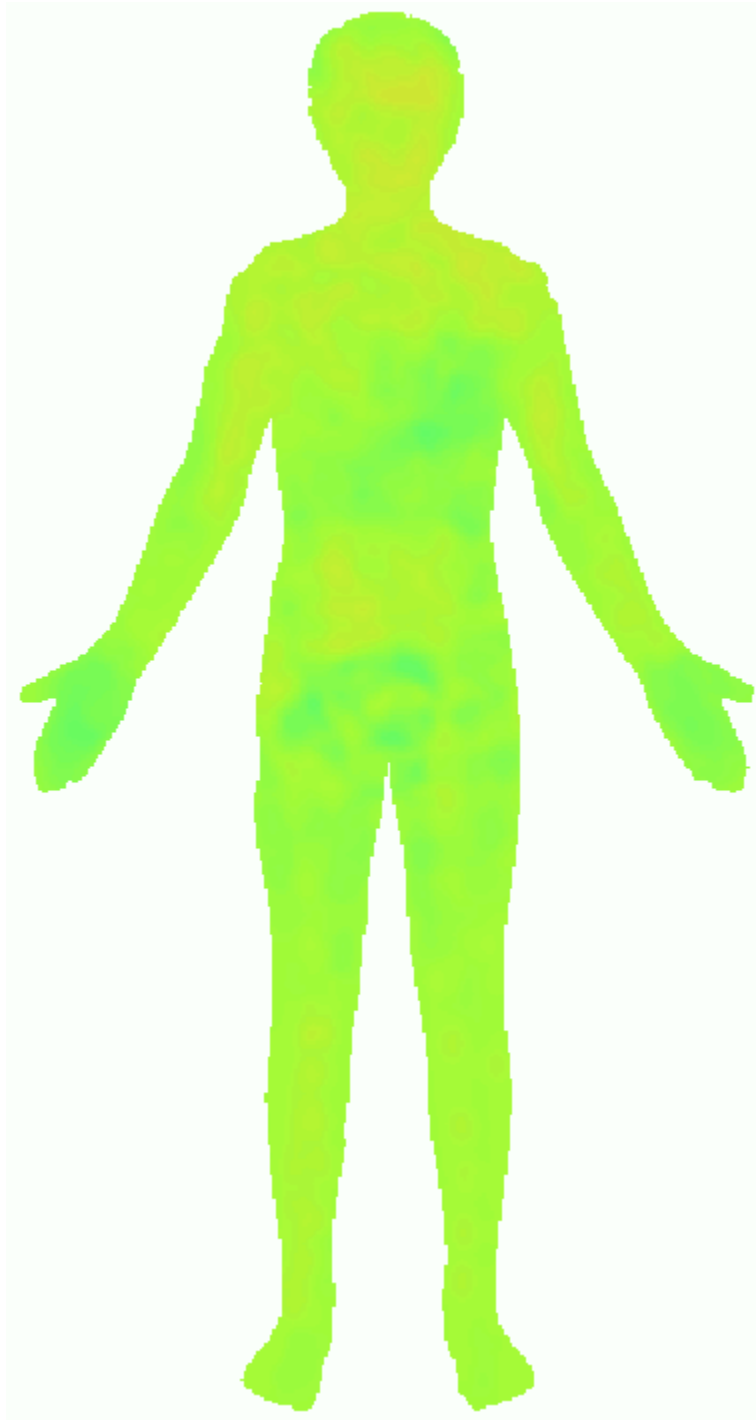

## Compassion

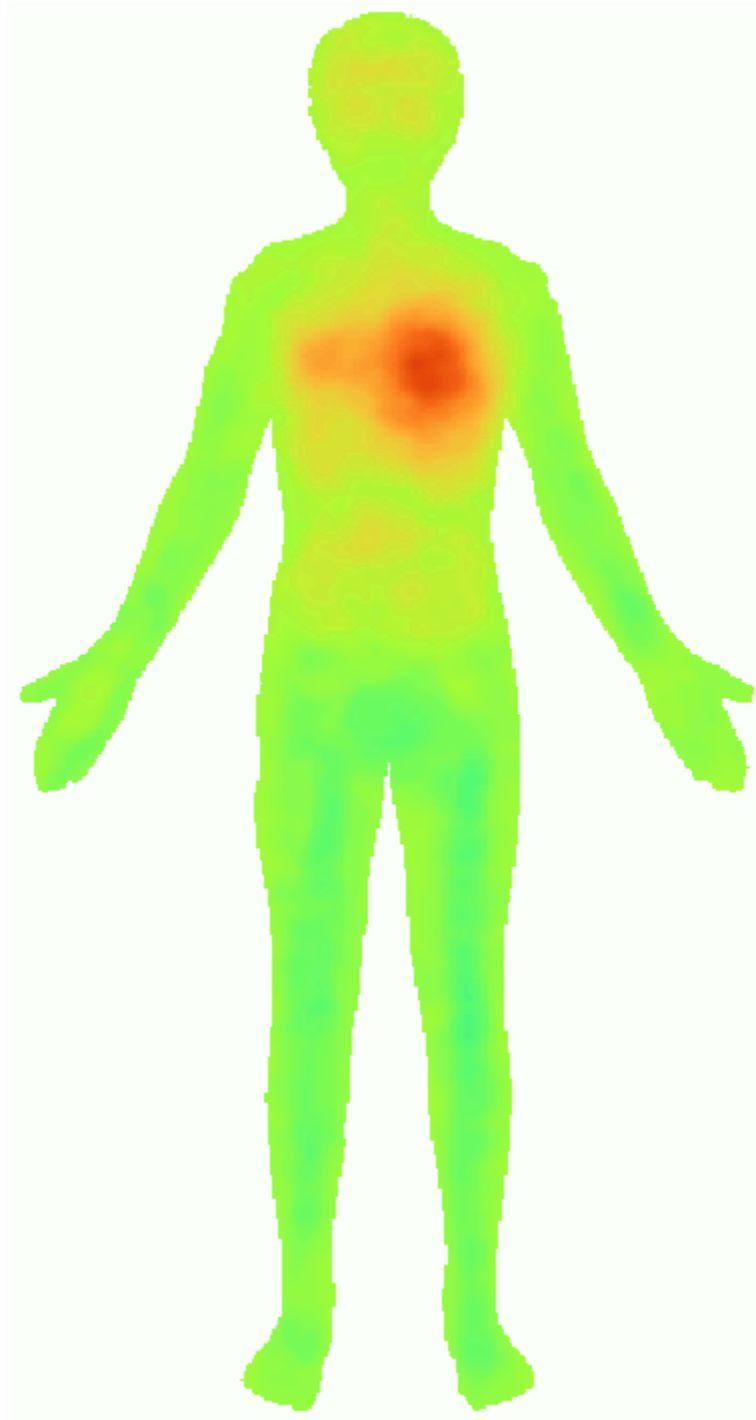

## Concern

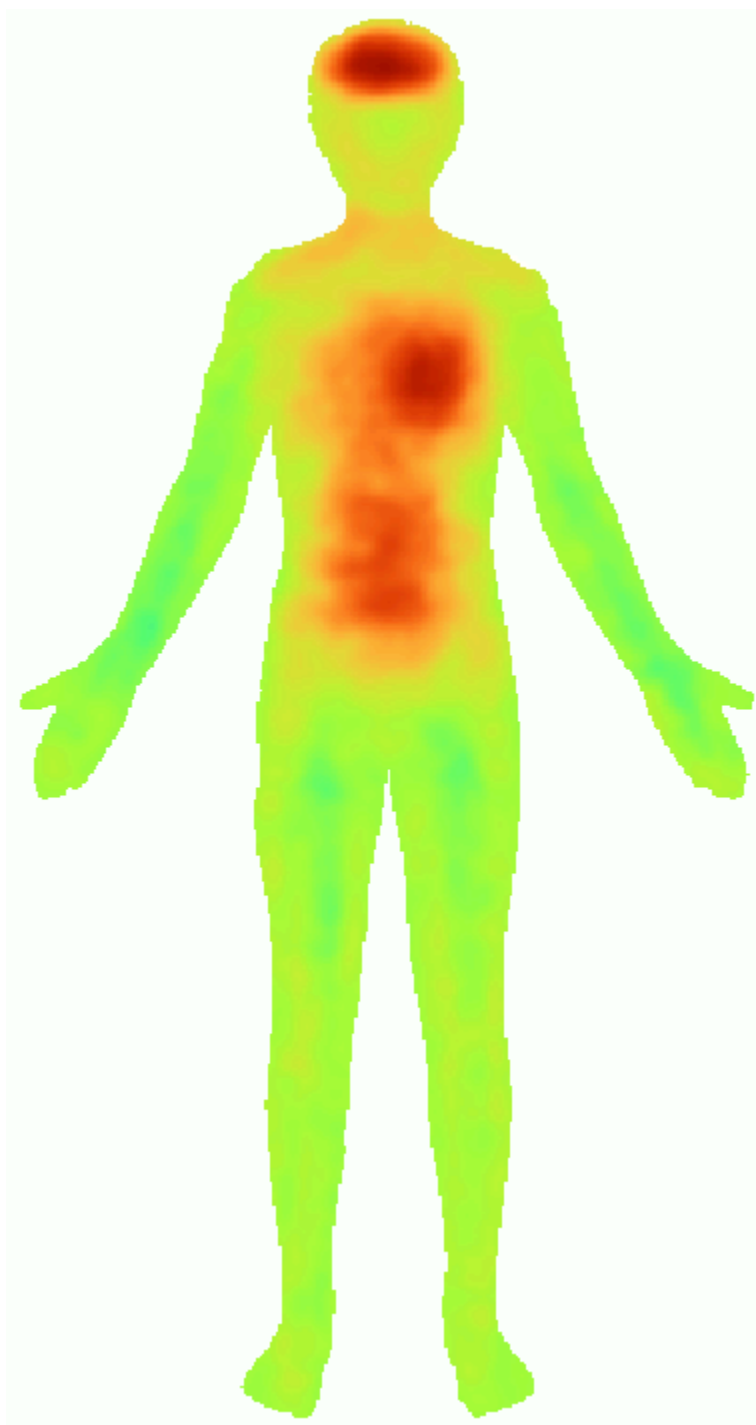

## Confusion

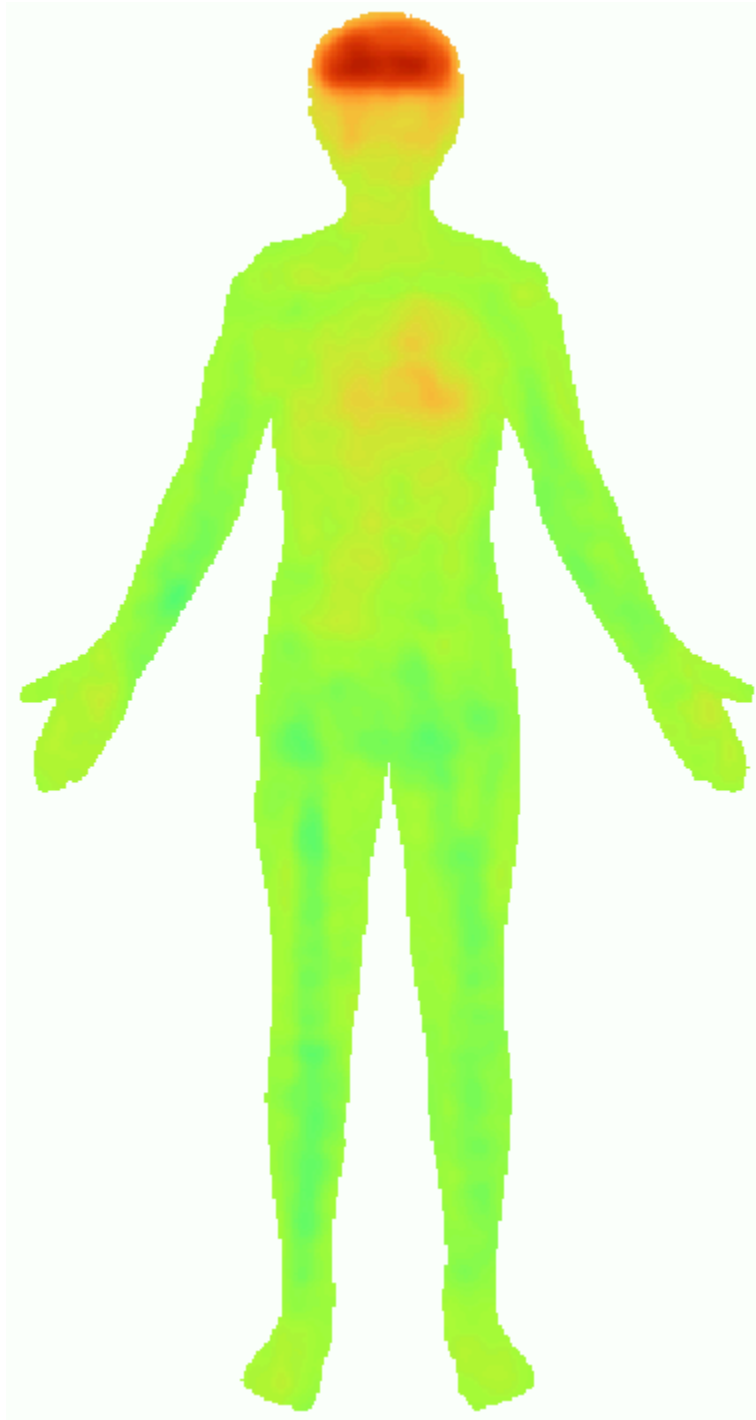

## Contempt

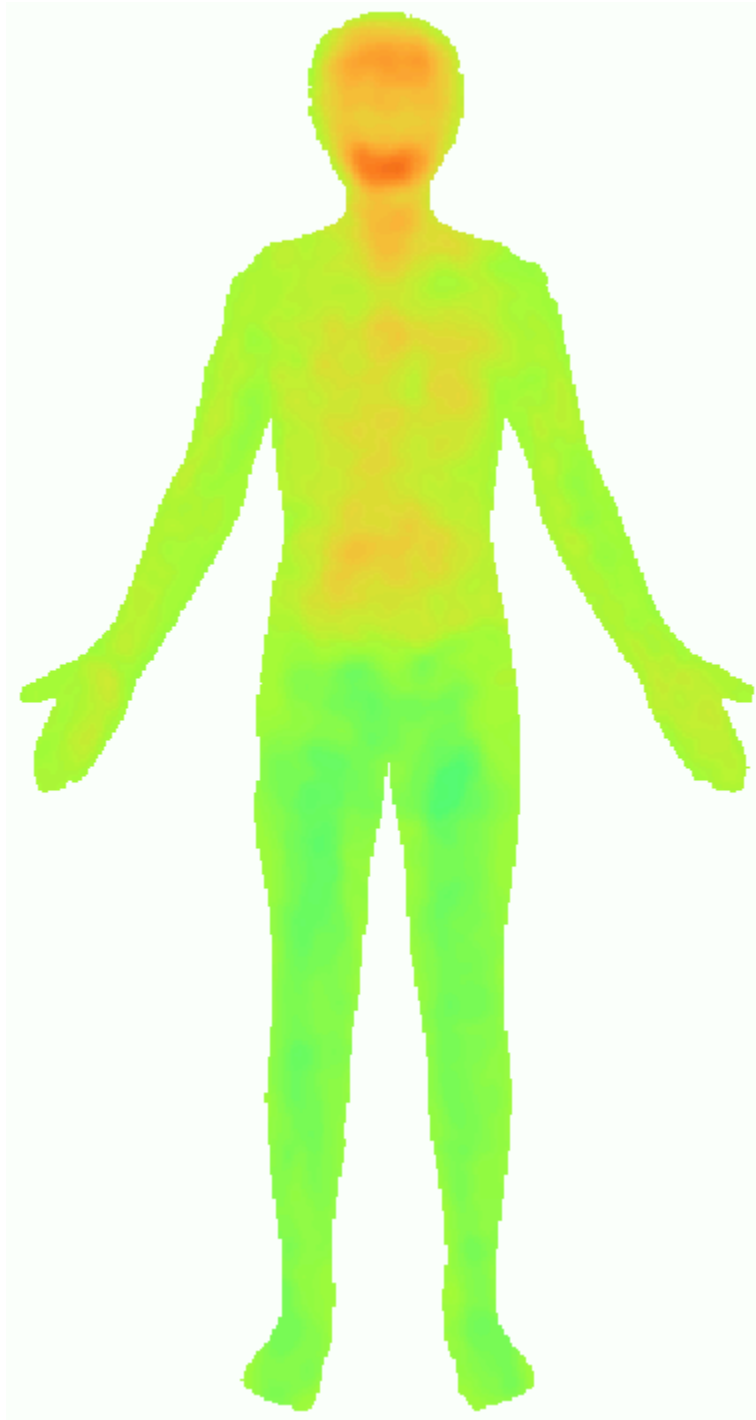

## Courage

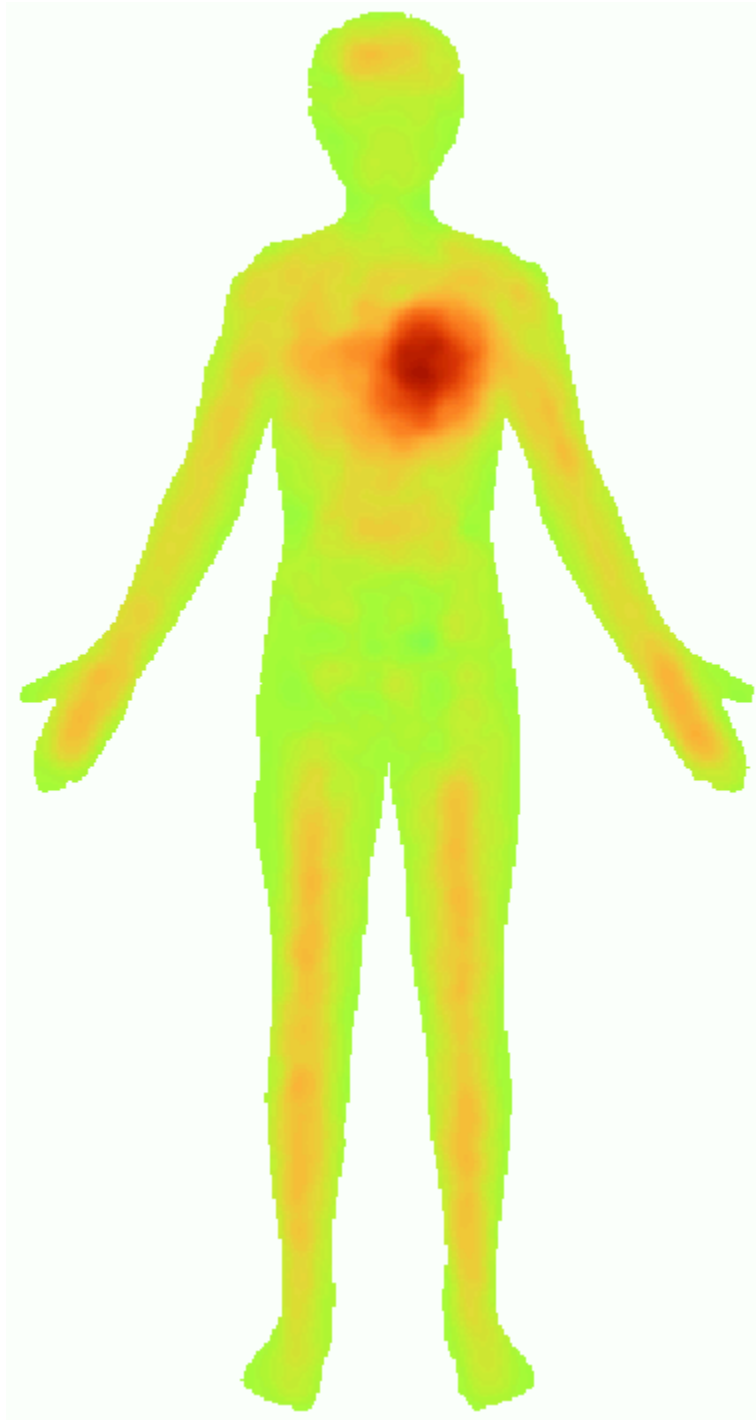

## Cruelty

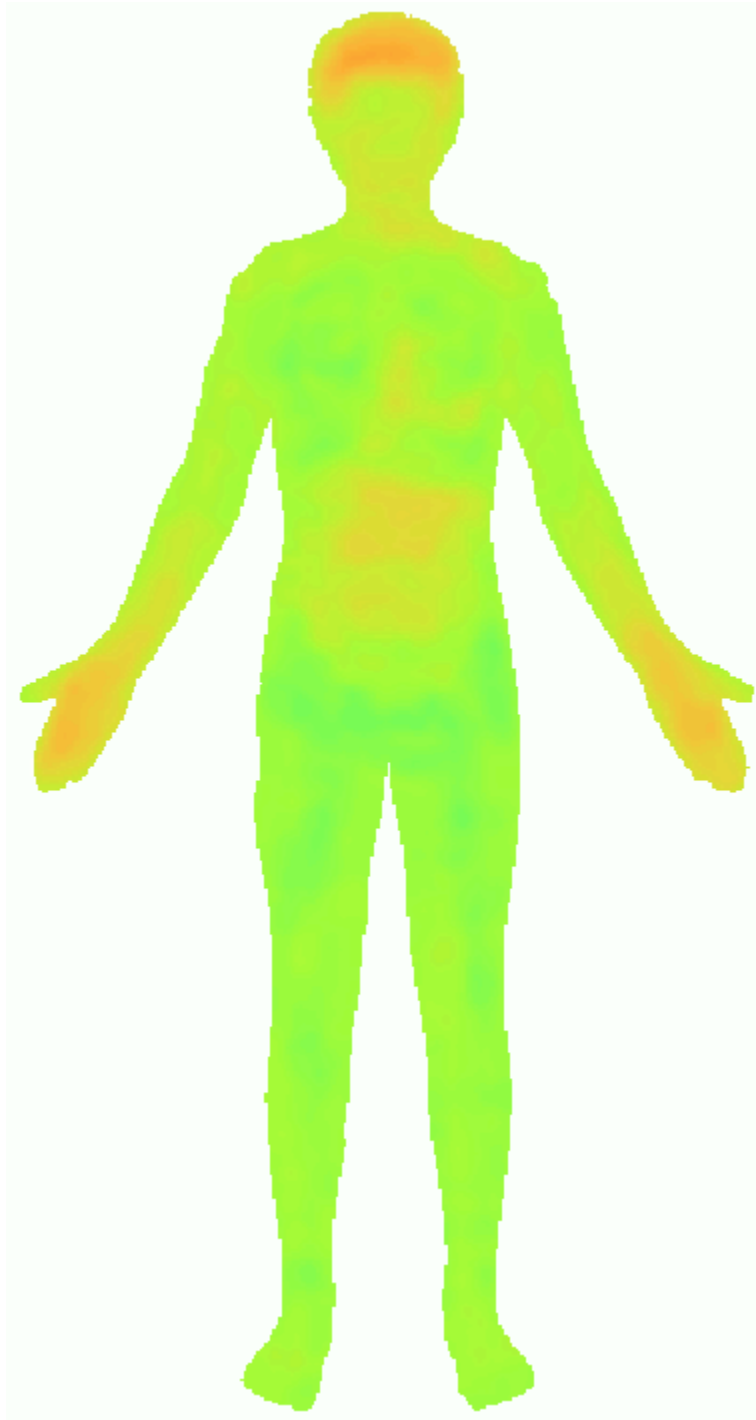

## Despair

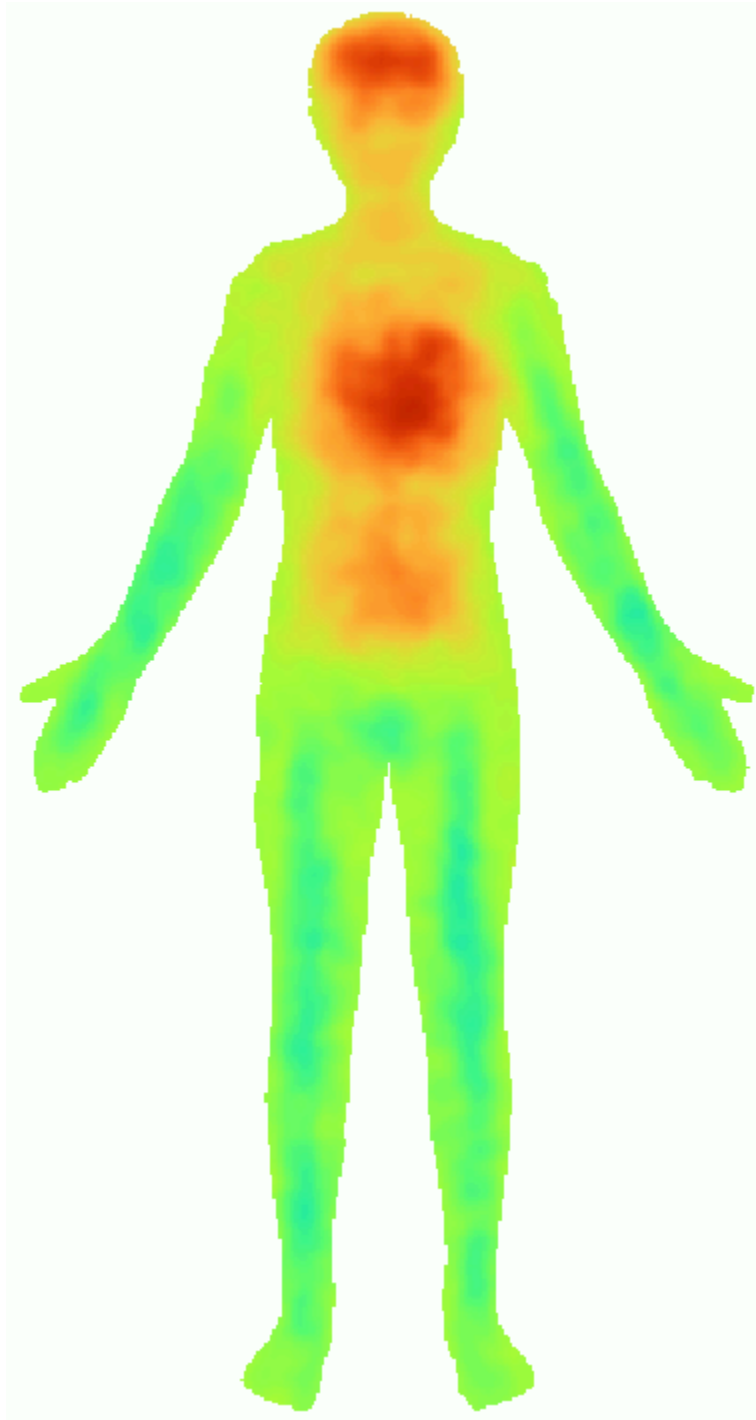

## Disappointment

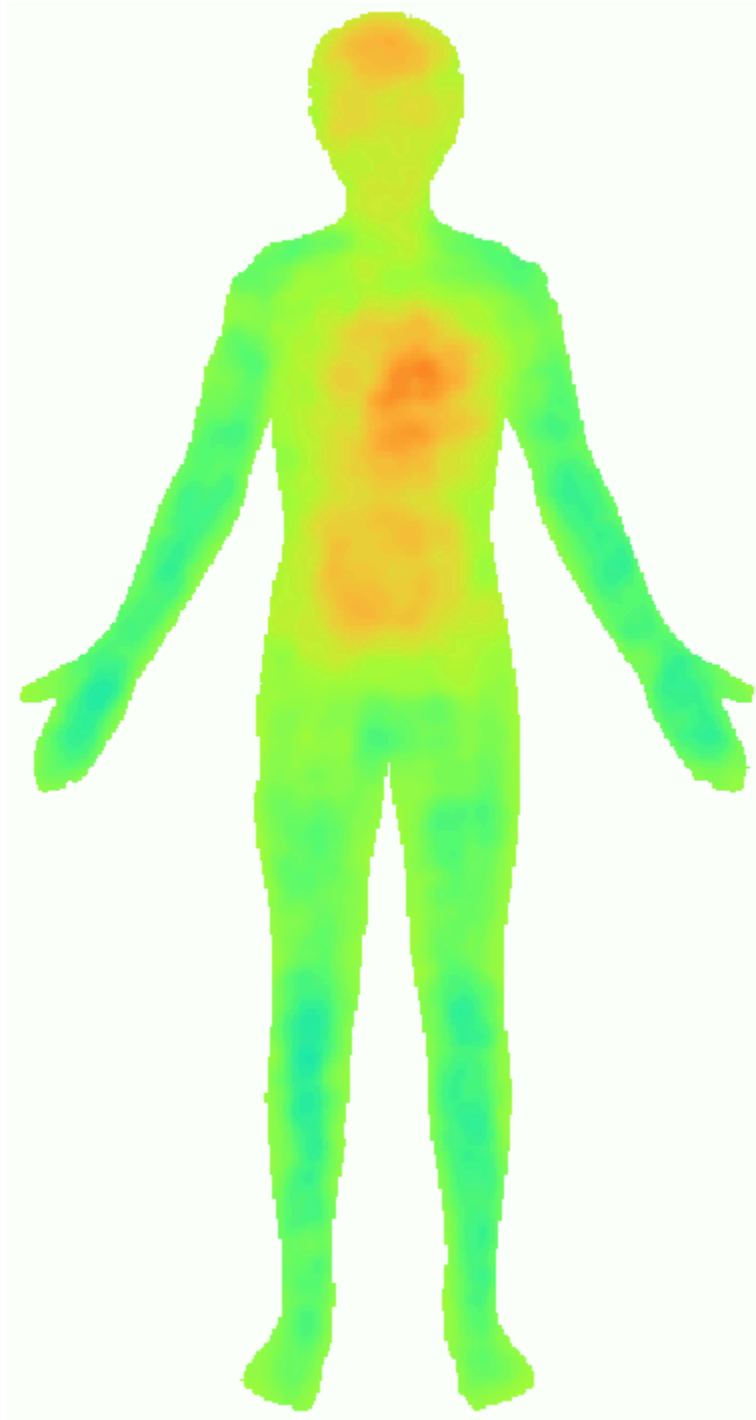

## Disgust

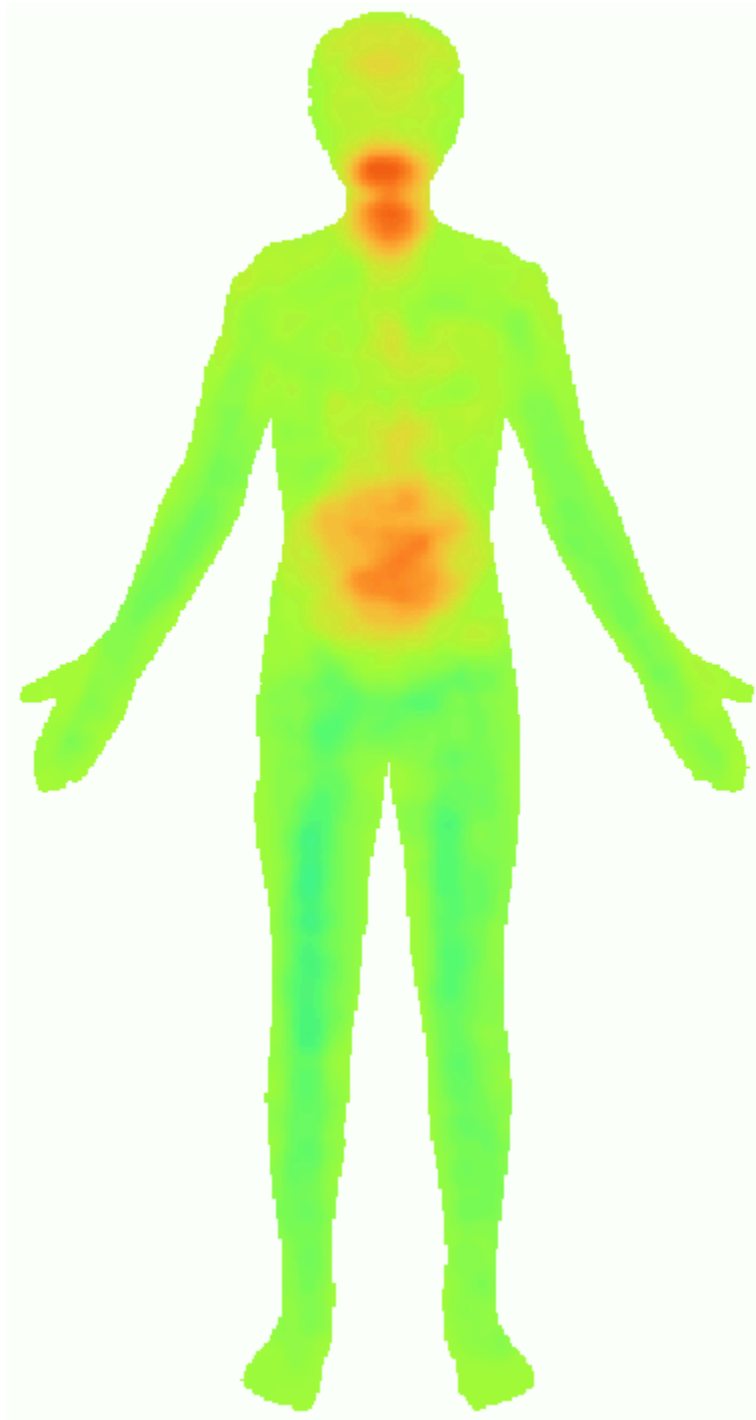

## Dissatisfaction

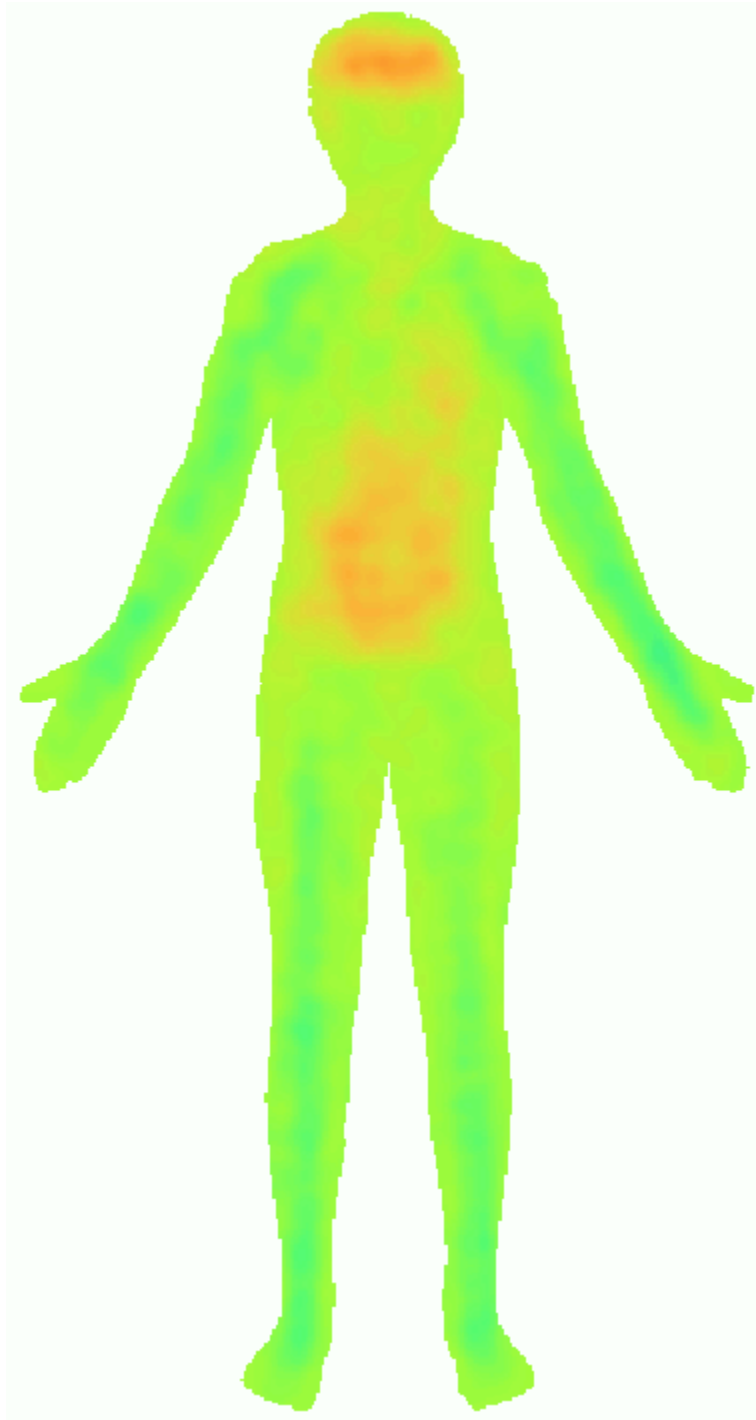

## Ecstasy

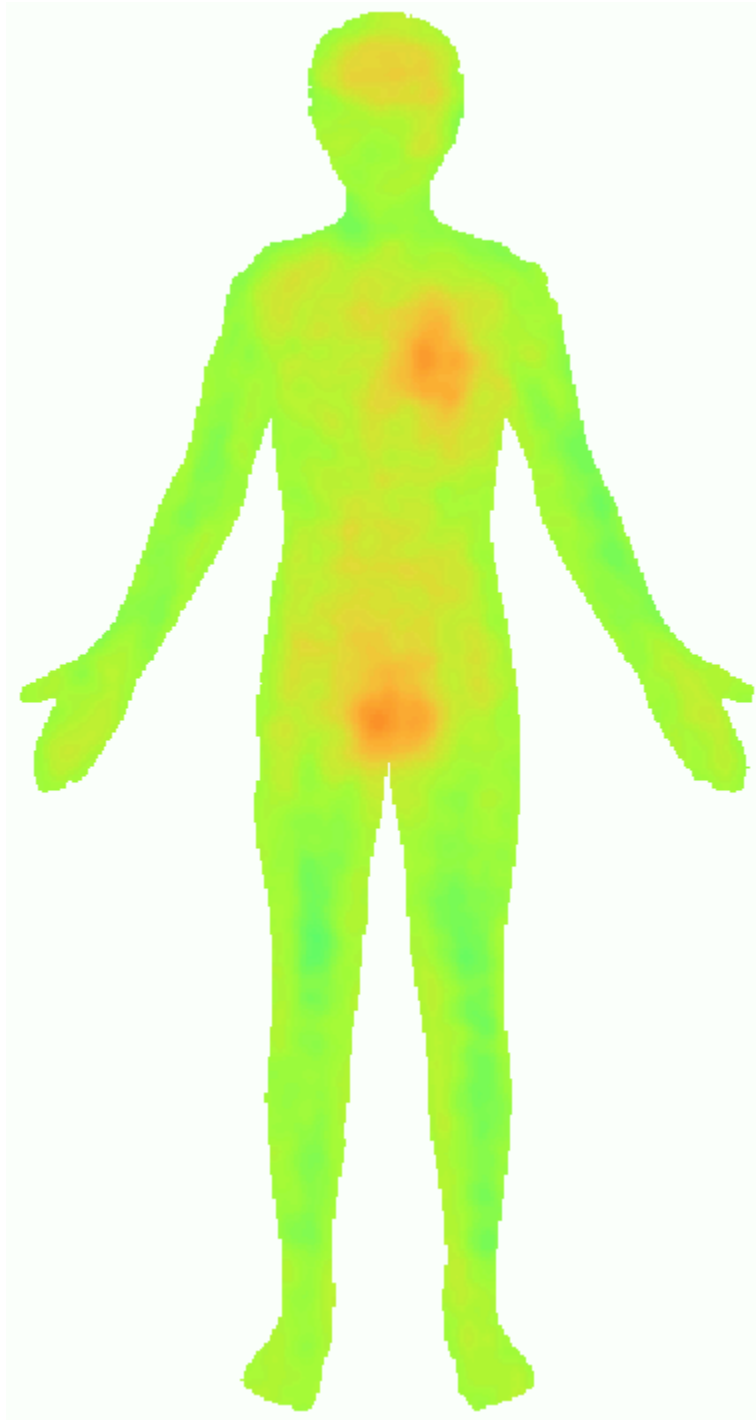

## Egotism

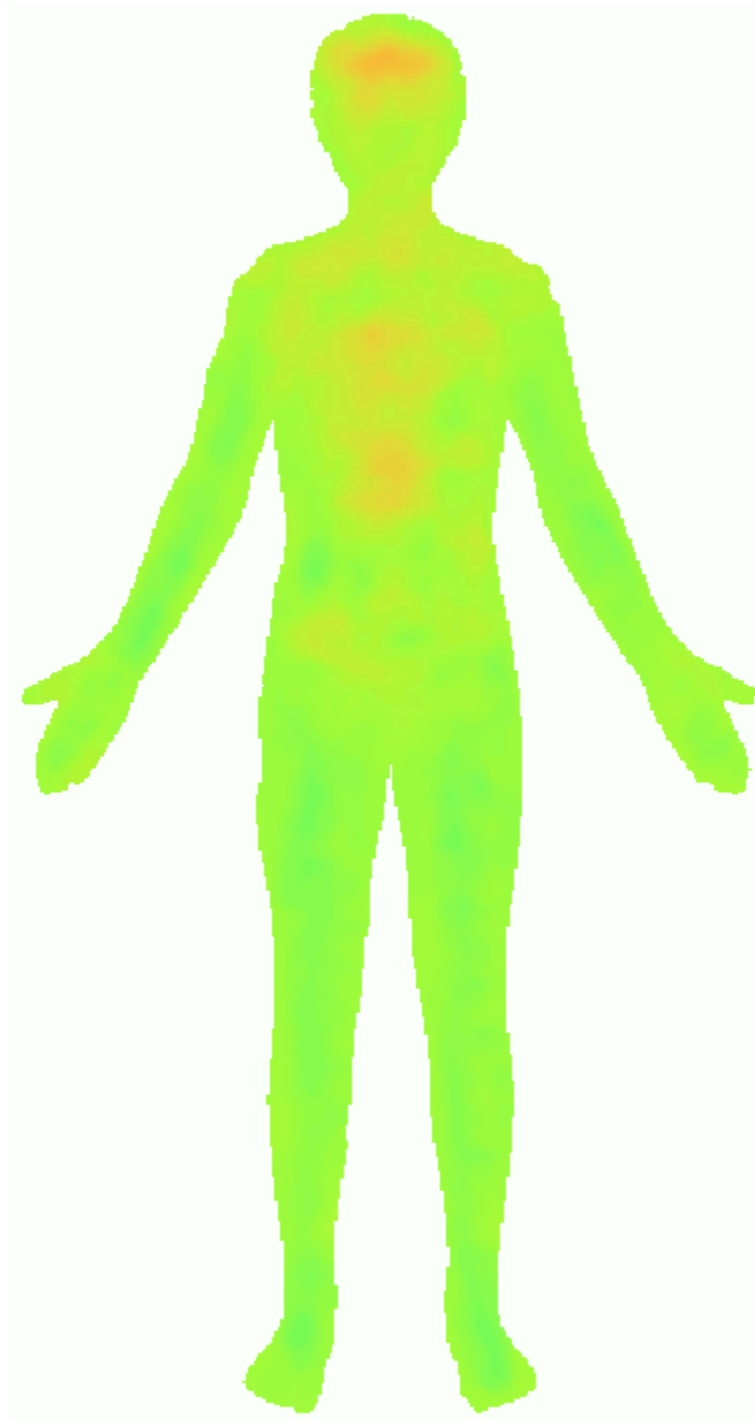

## Elation

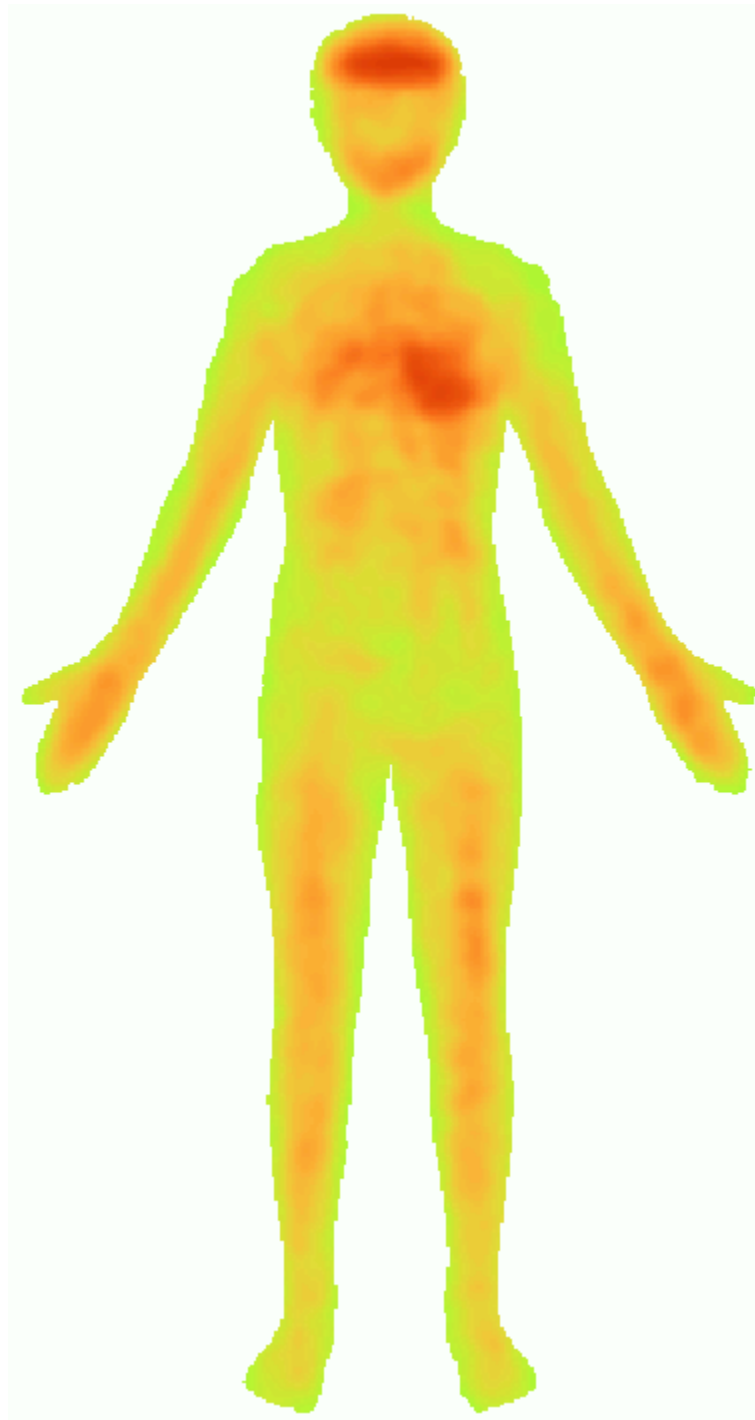

## Embarrassment

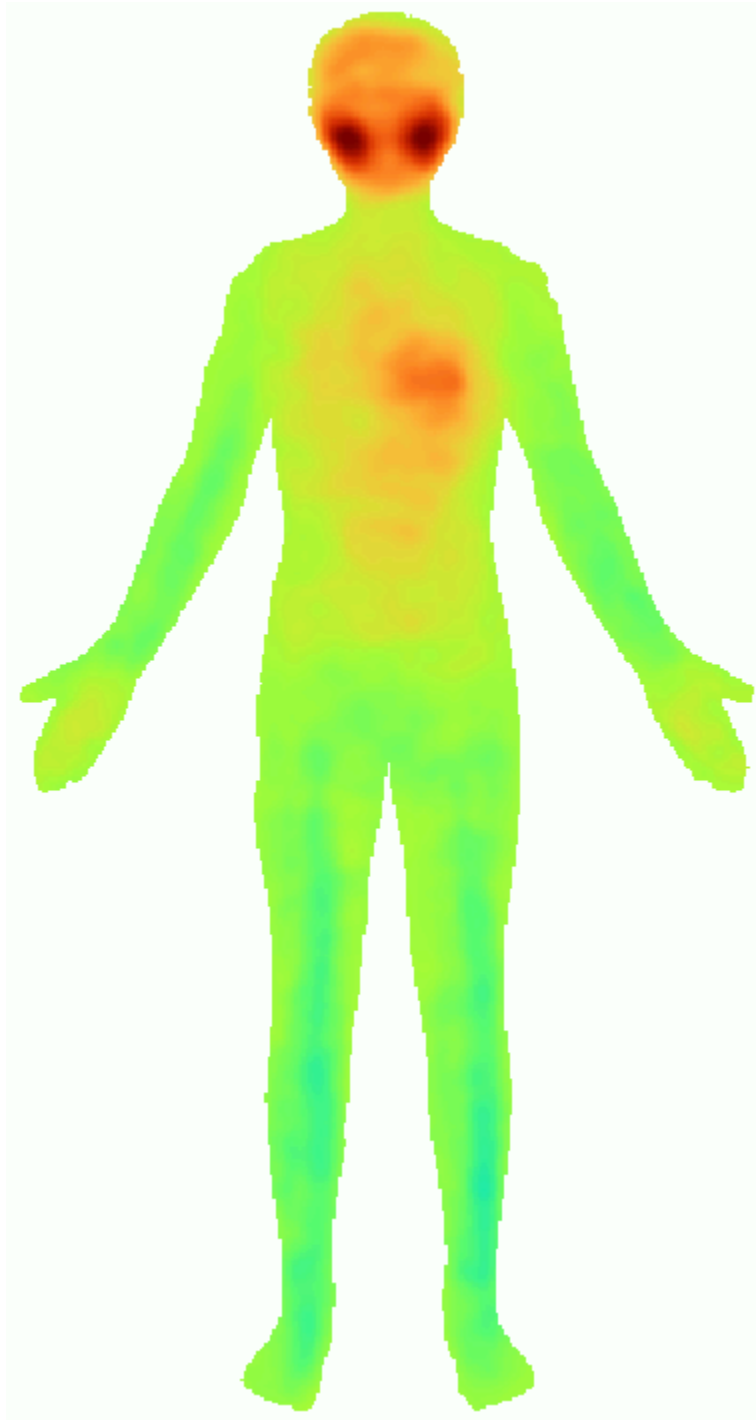

## Envy

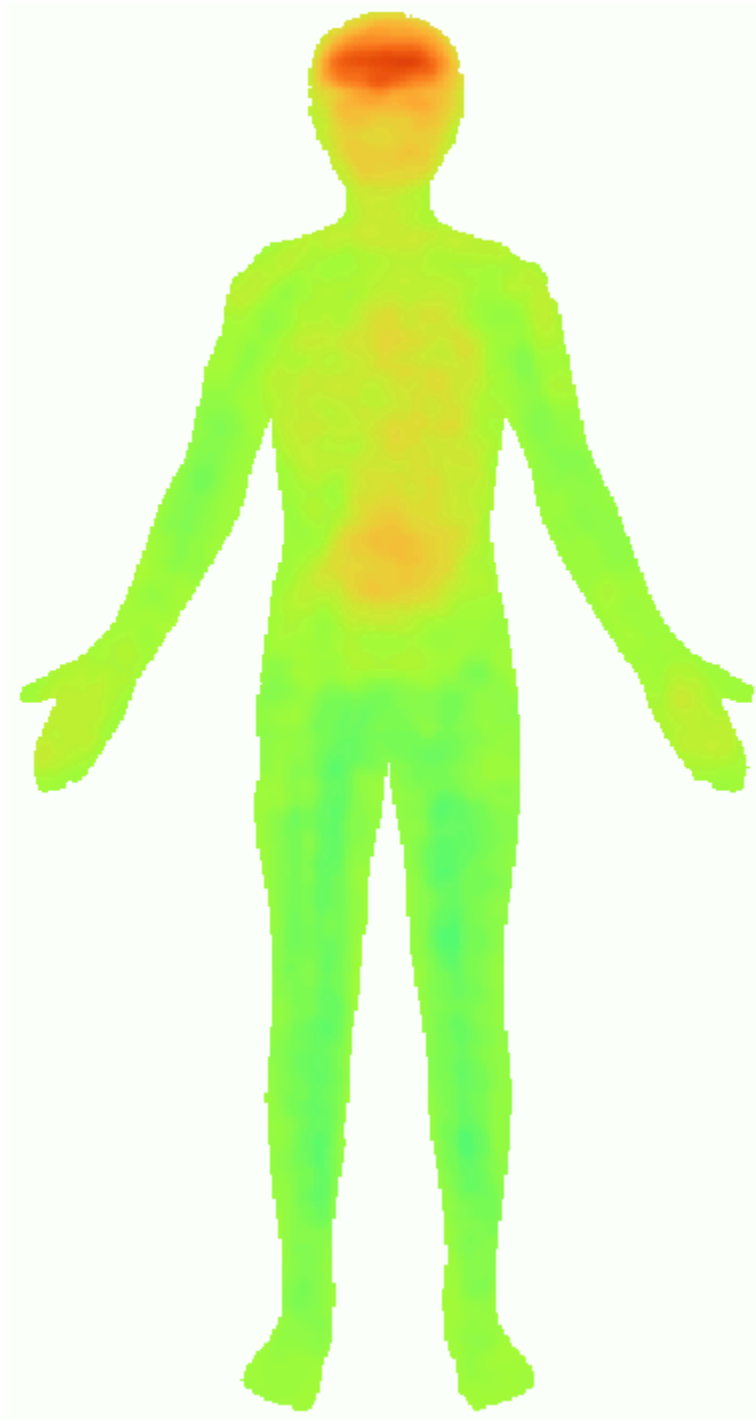

## Fear

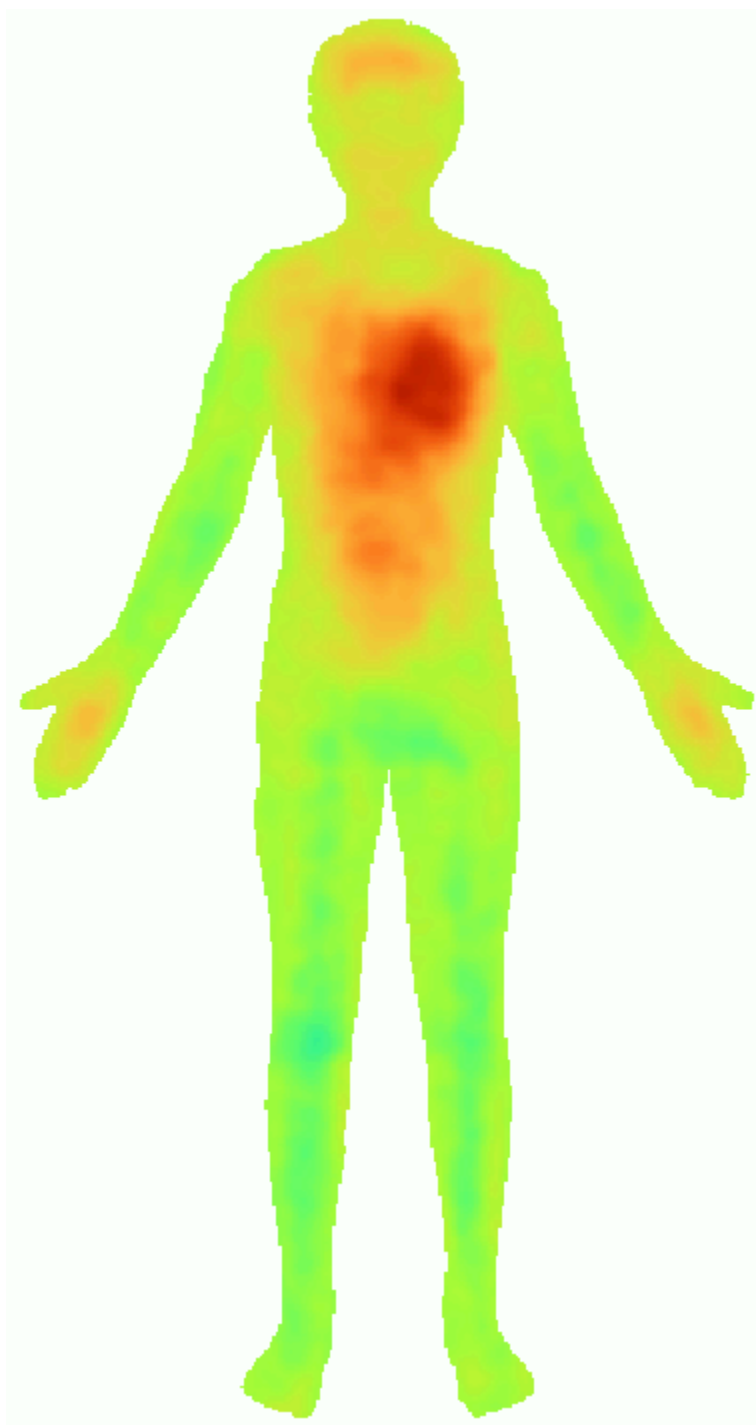

## Fury

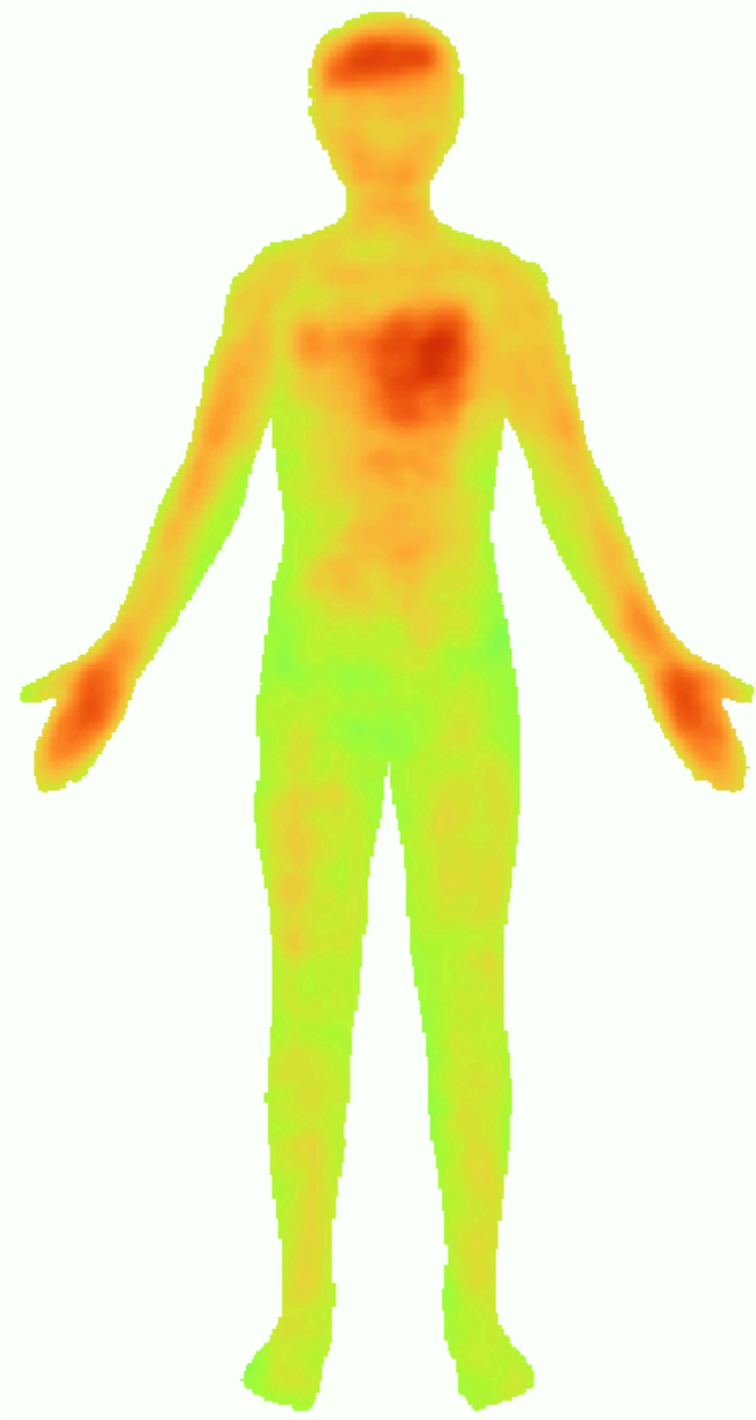

## Generosity

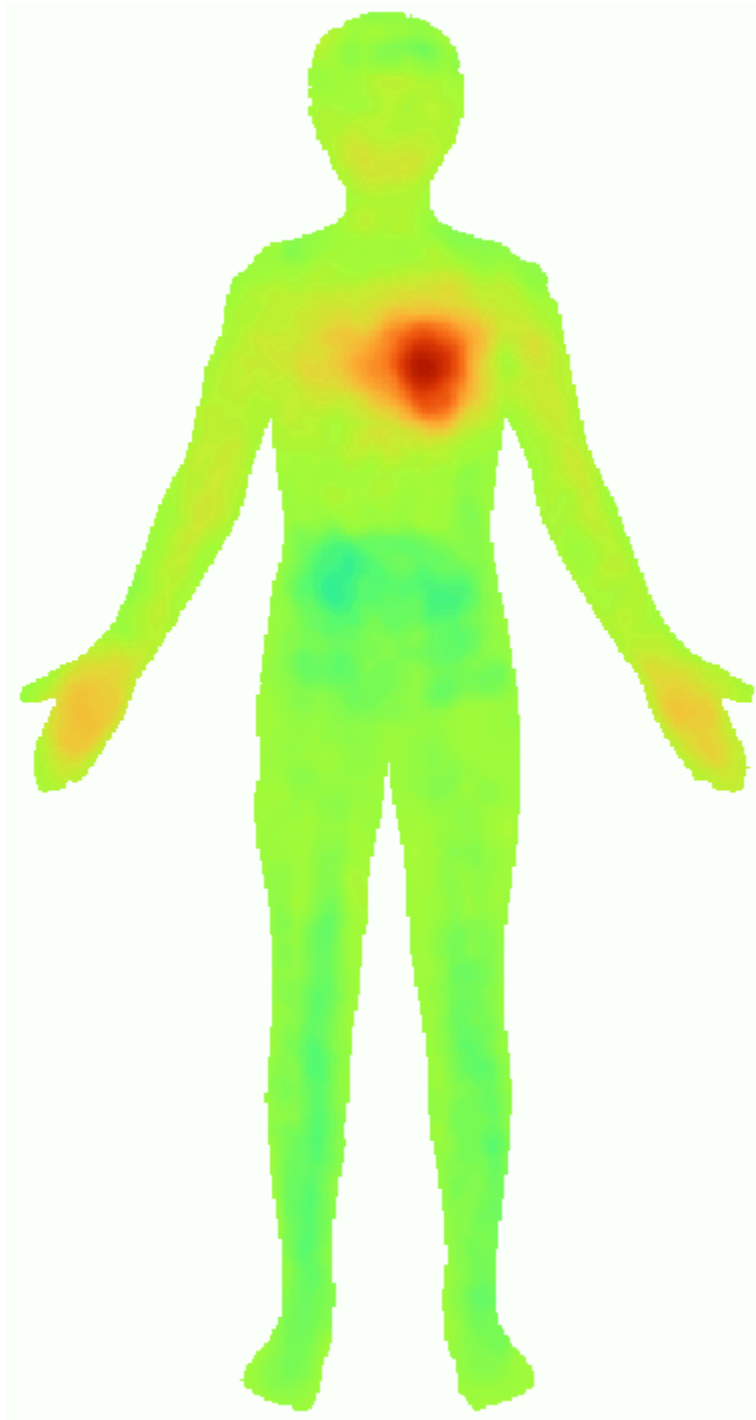

## Gratitude

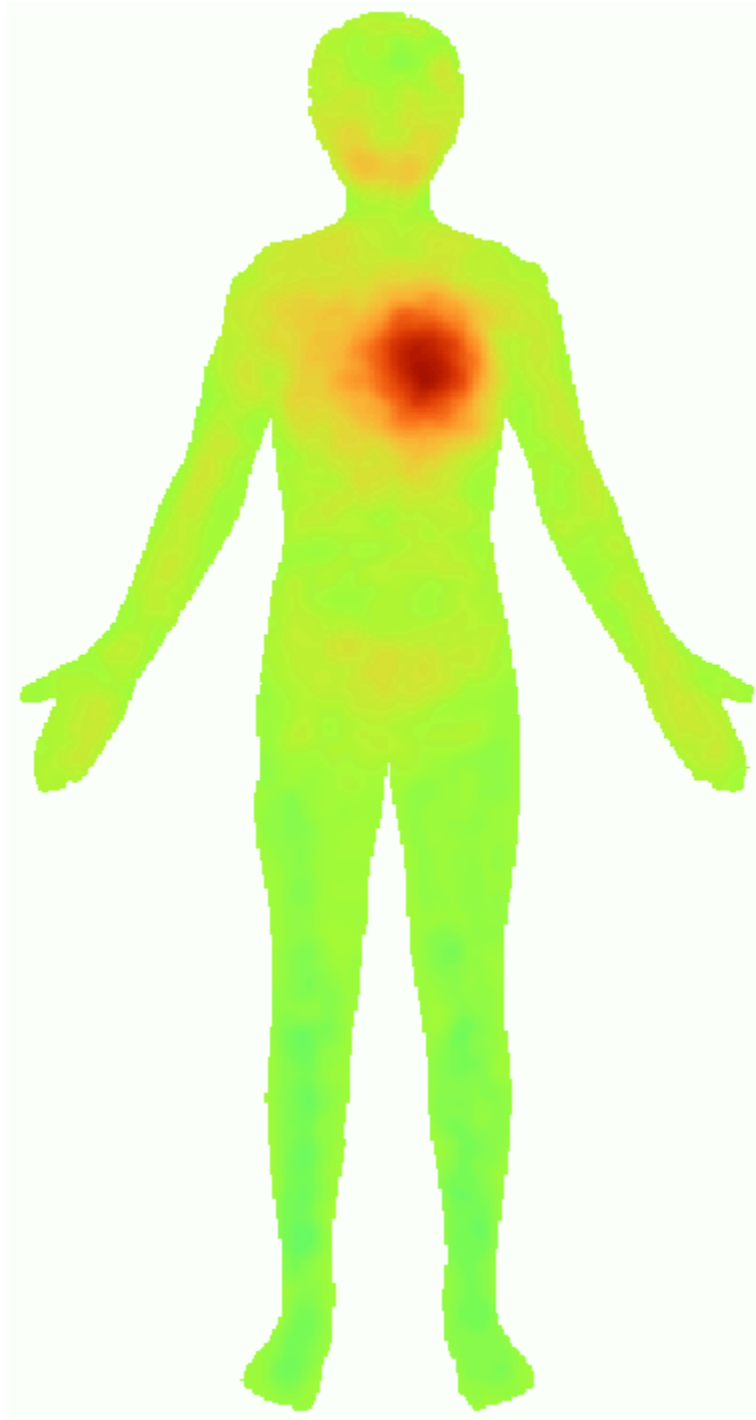

## Guilt

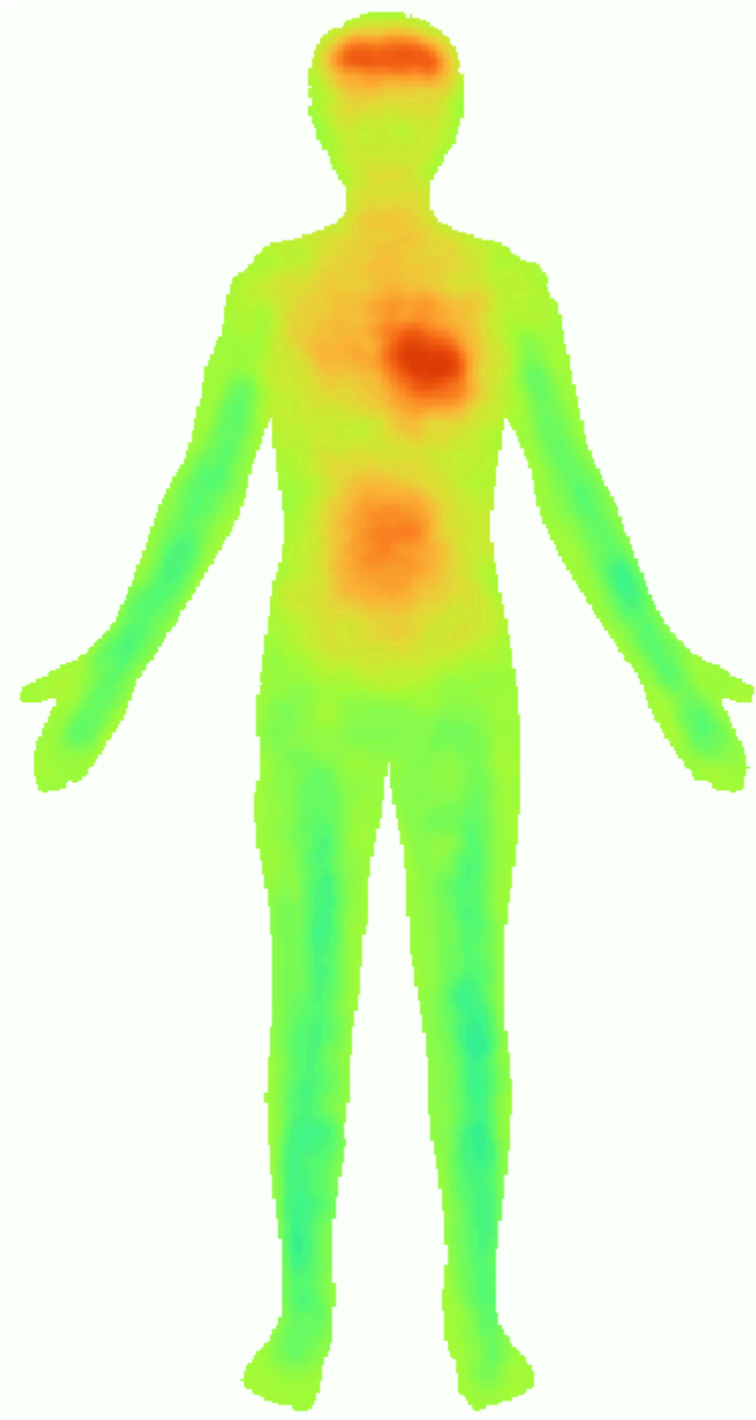

## Happiness

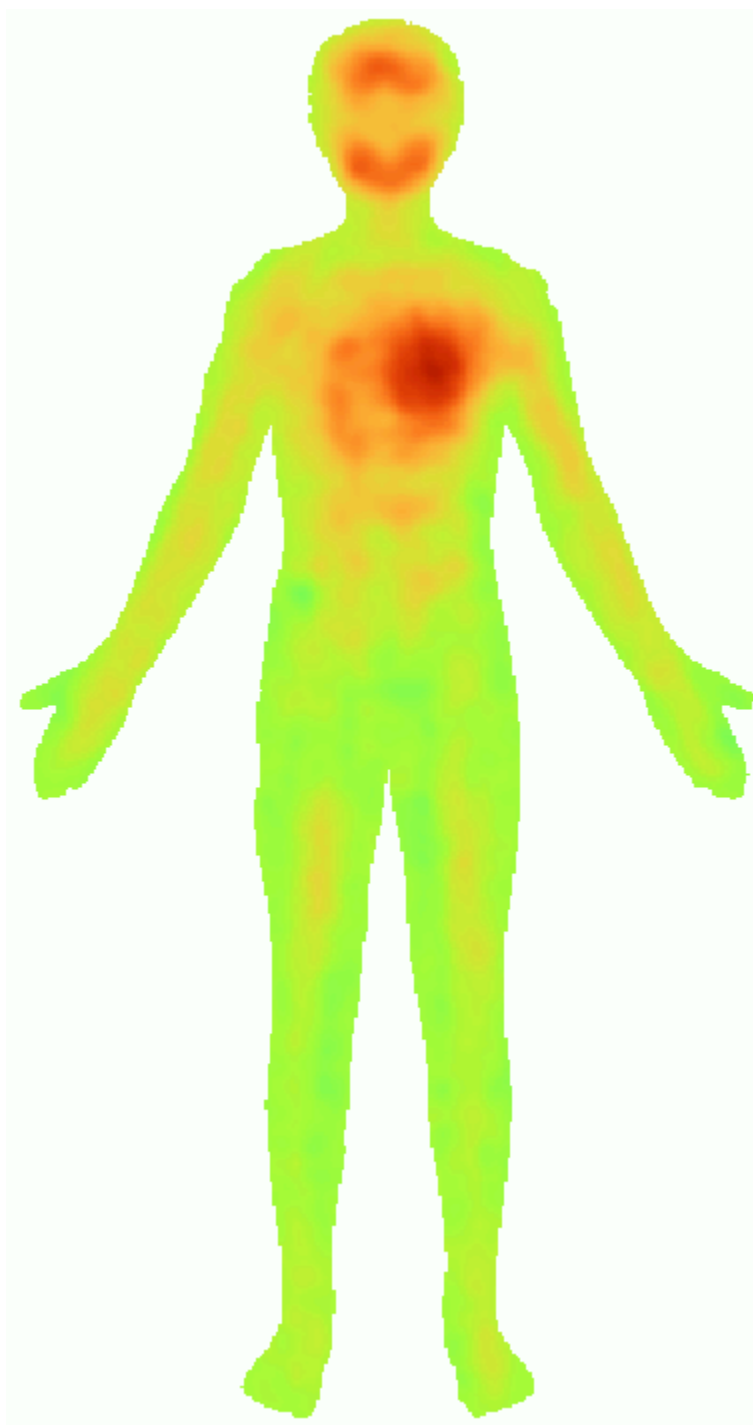

## Hate

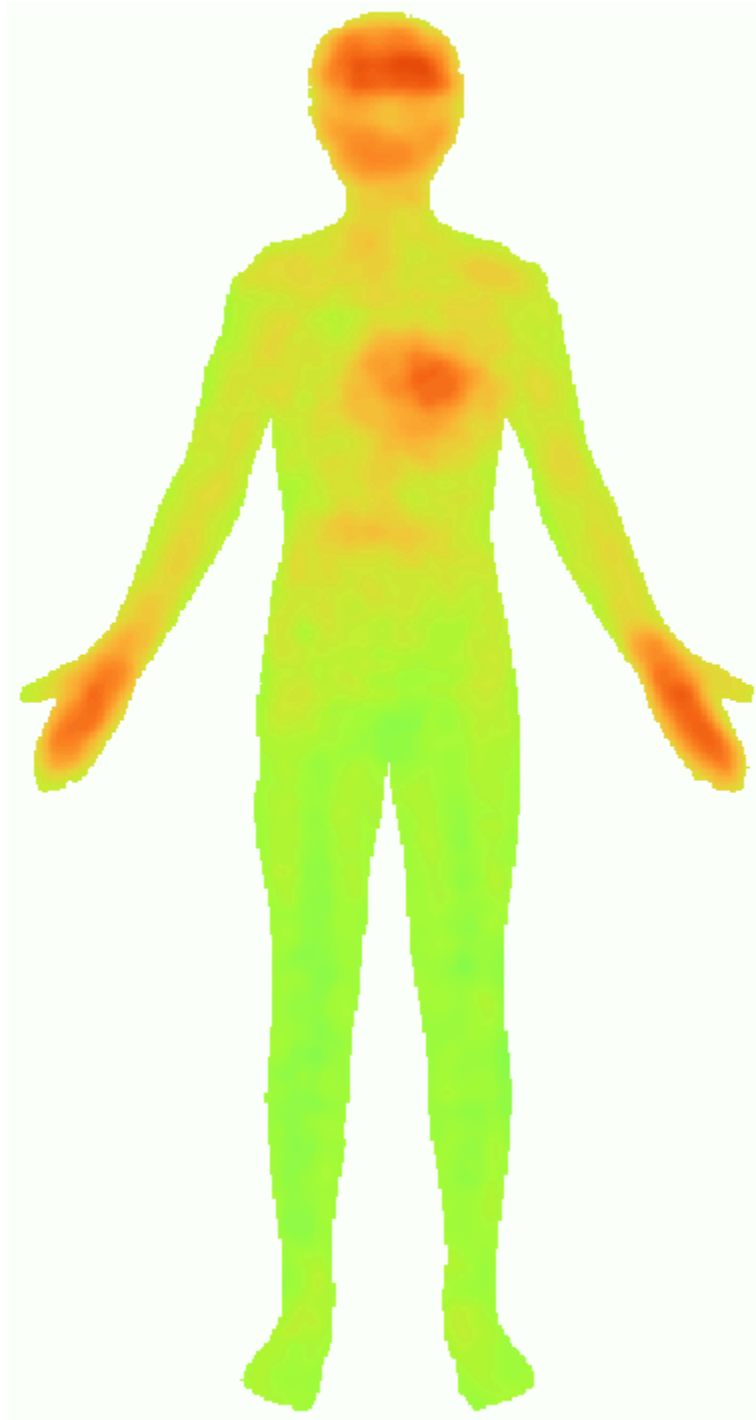

## Hope

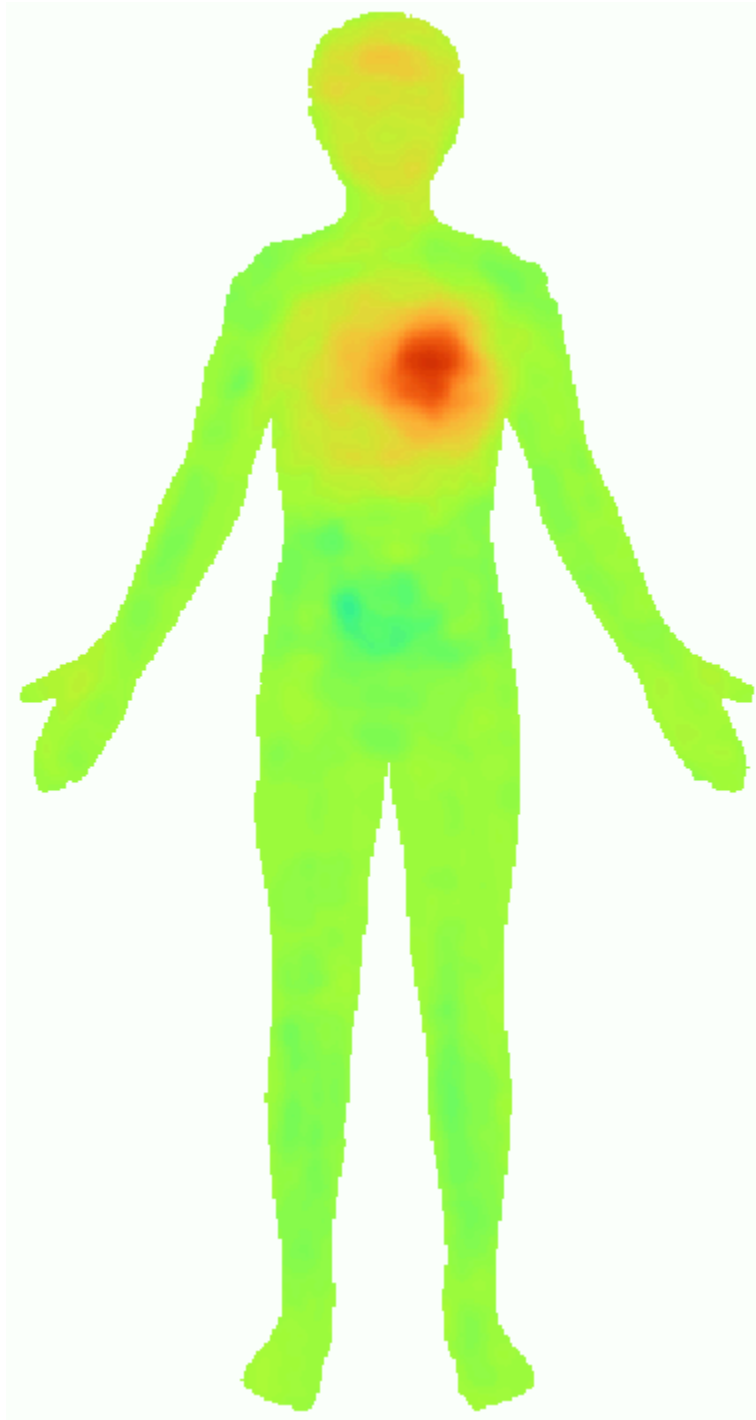

## Horror

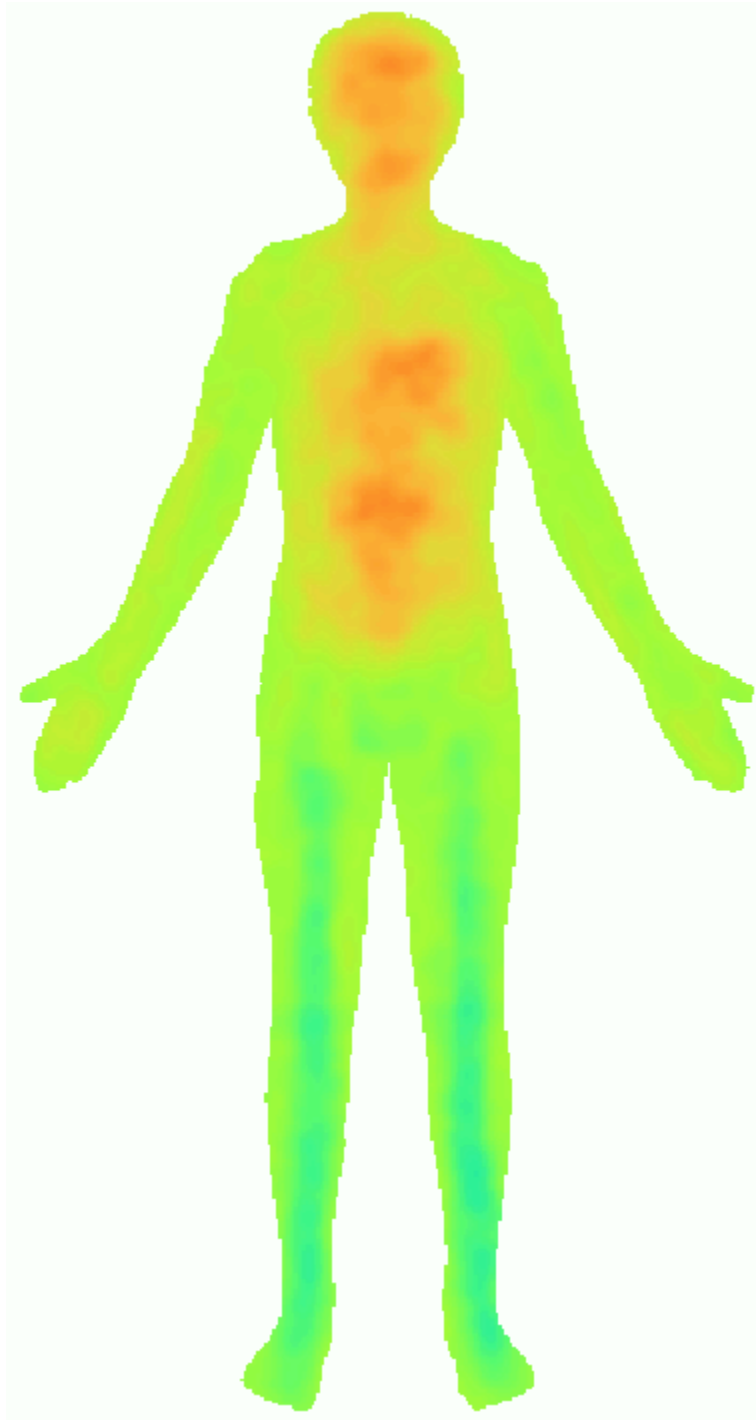

## Humbleness

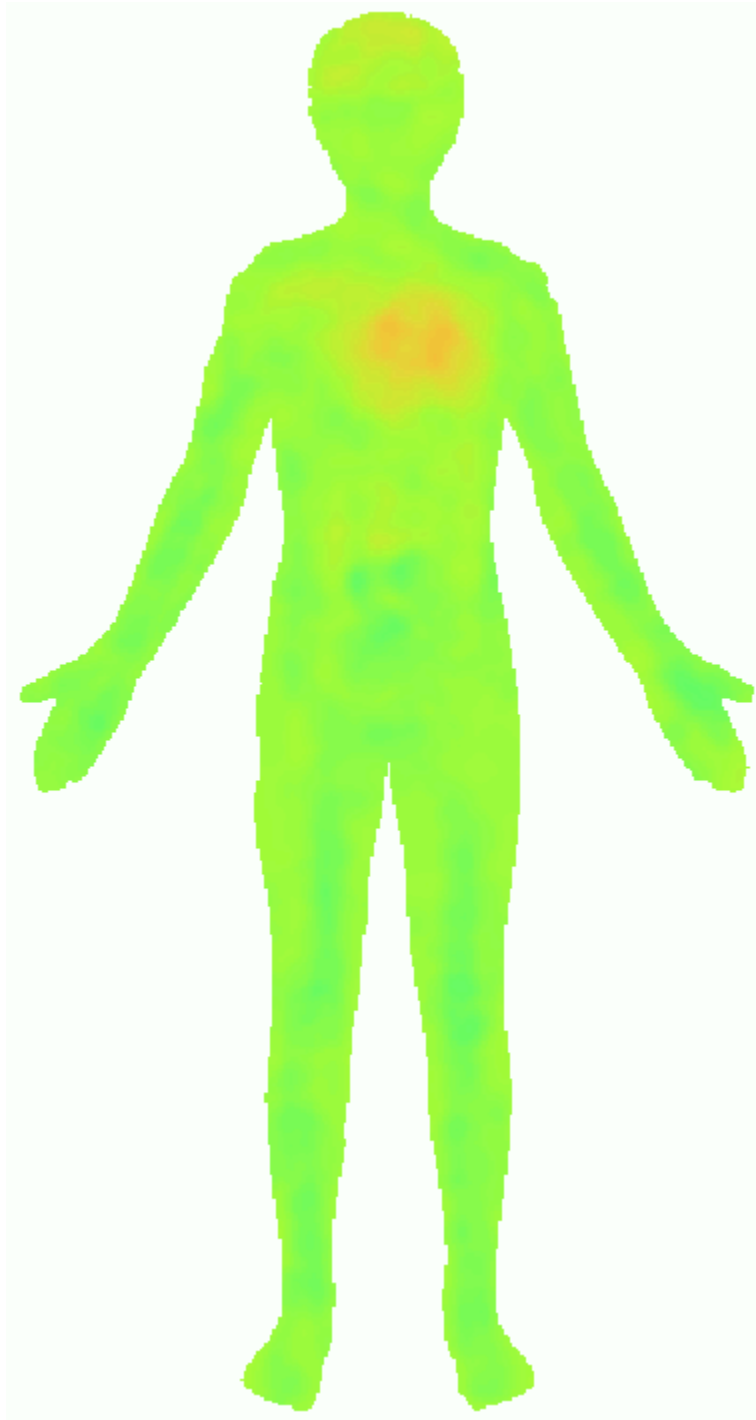

## Humiliation

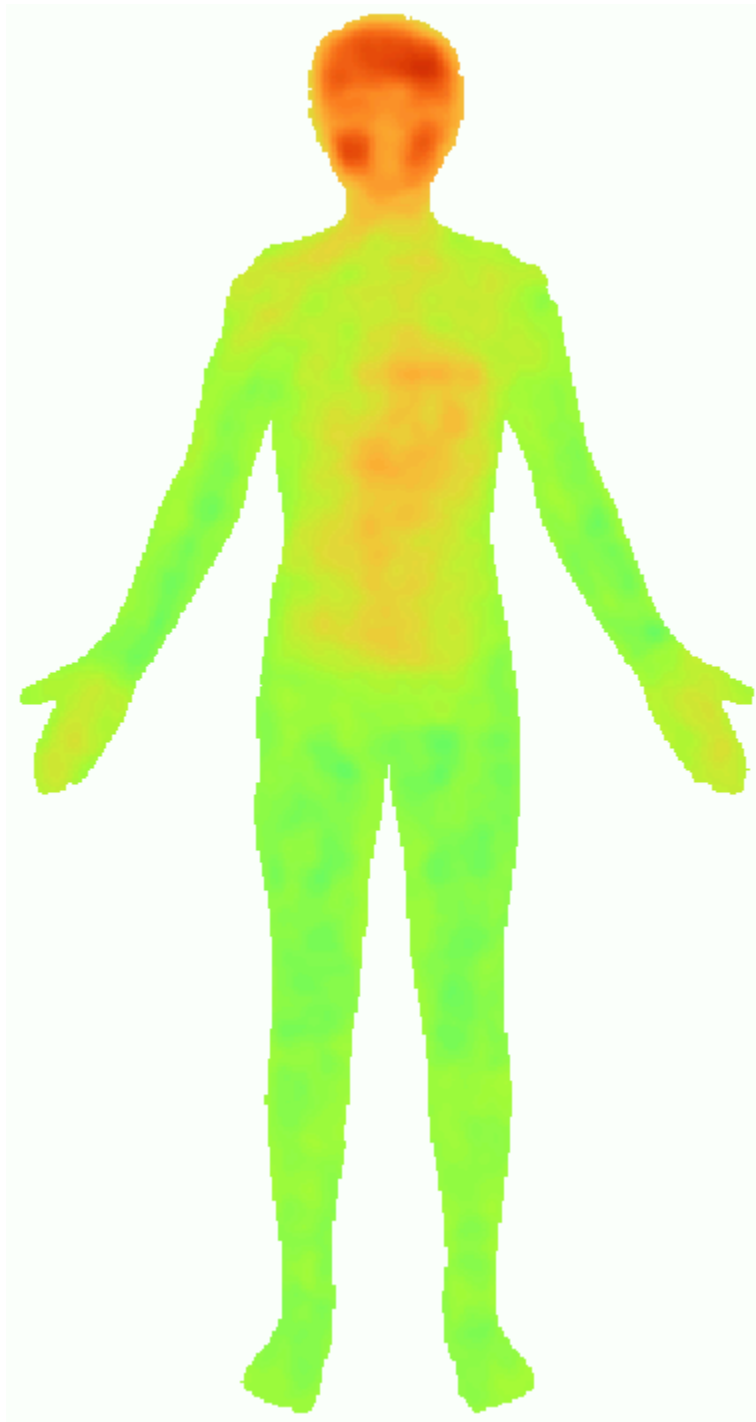

## Impatience

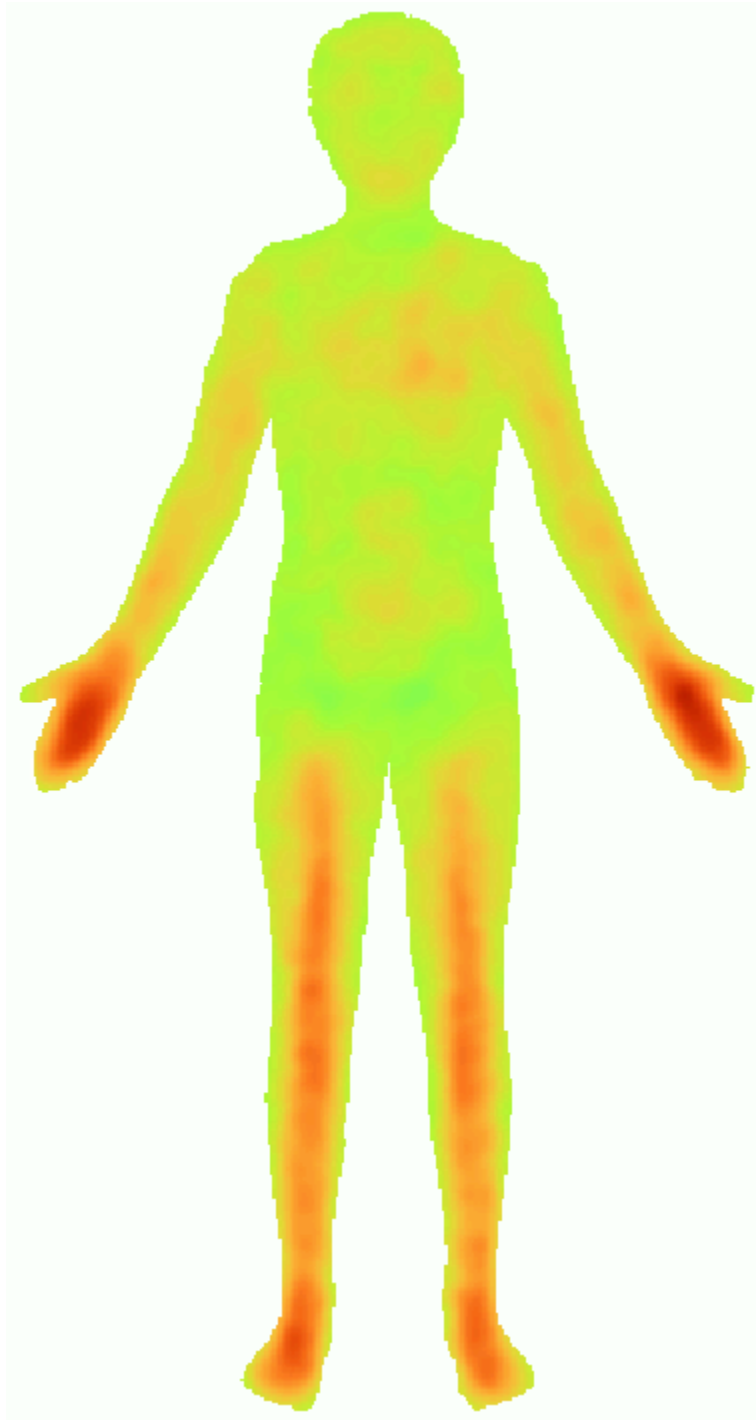

## Indifference

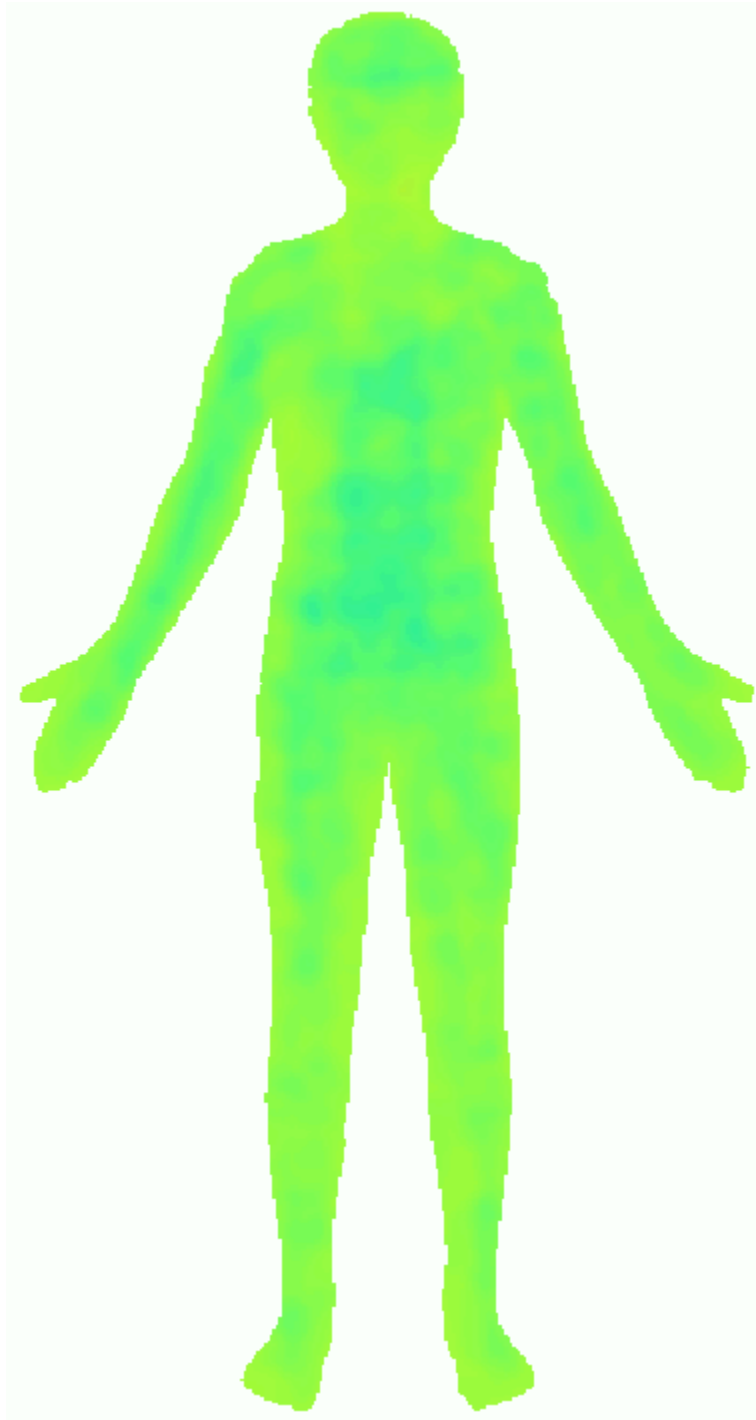

## Jealousy

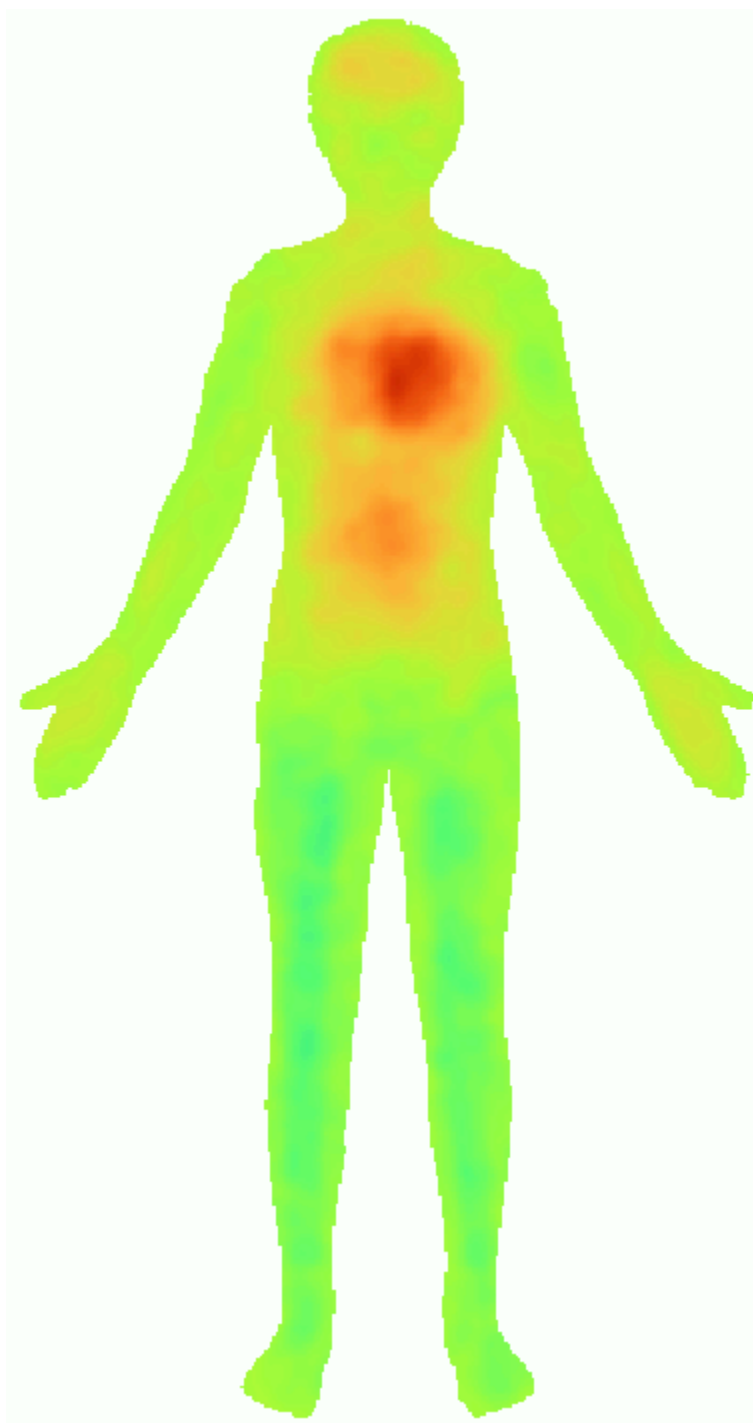

## Joy

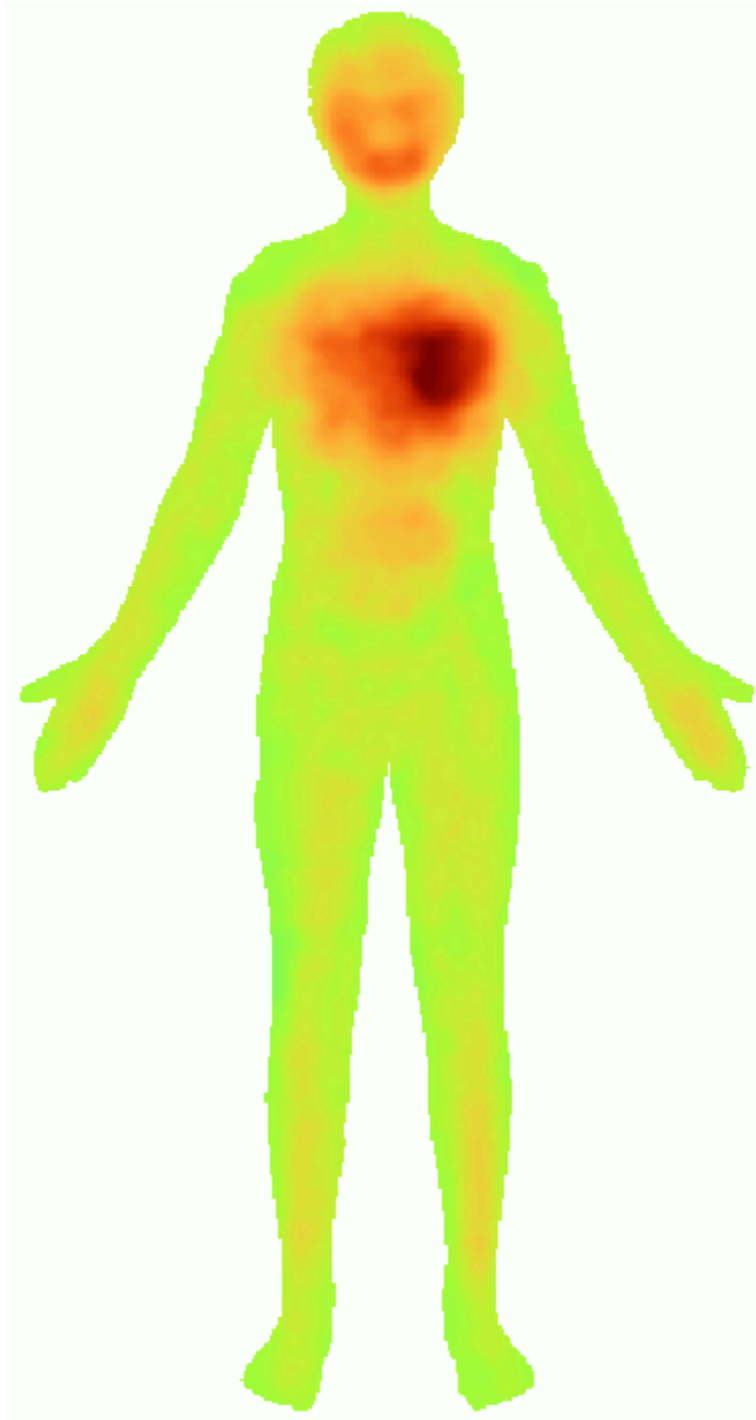

## Love

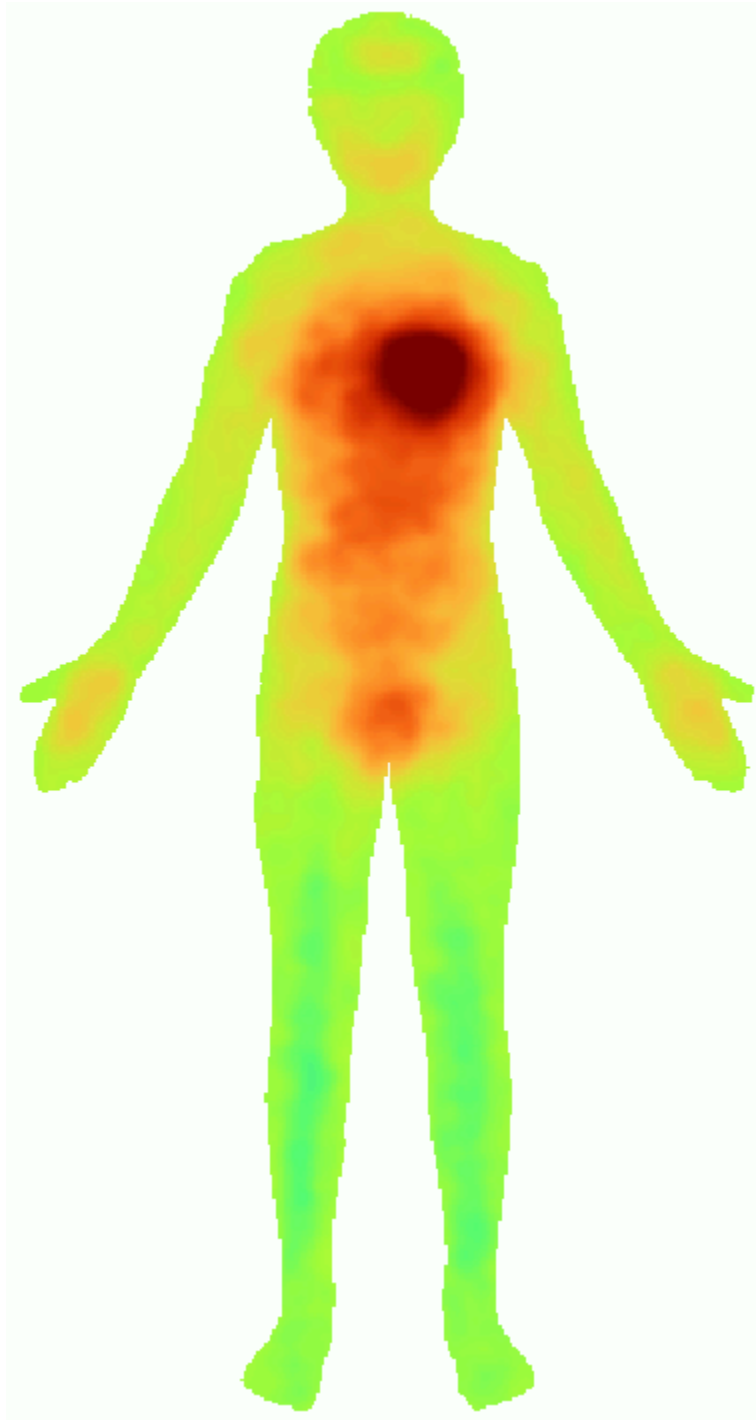

## Lust

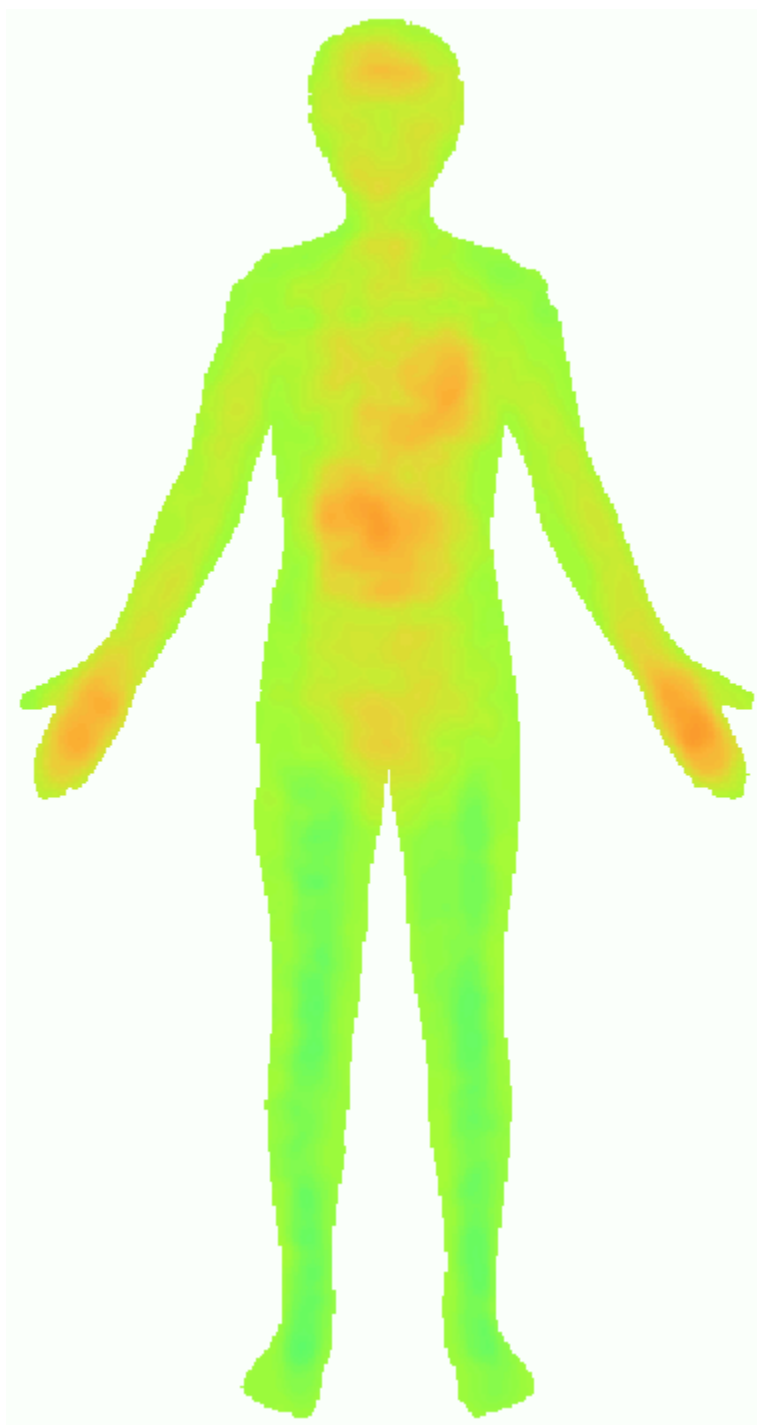

**Nervousness**

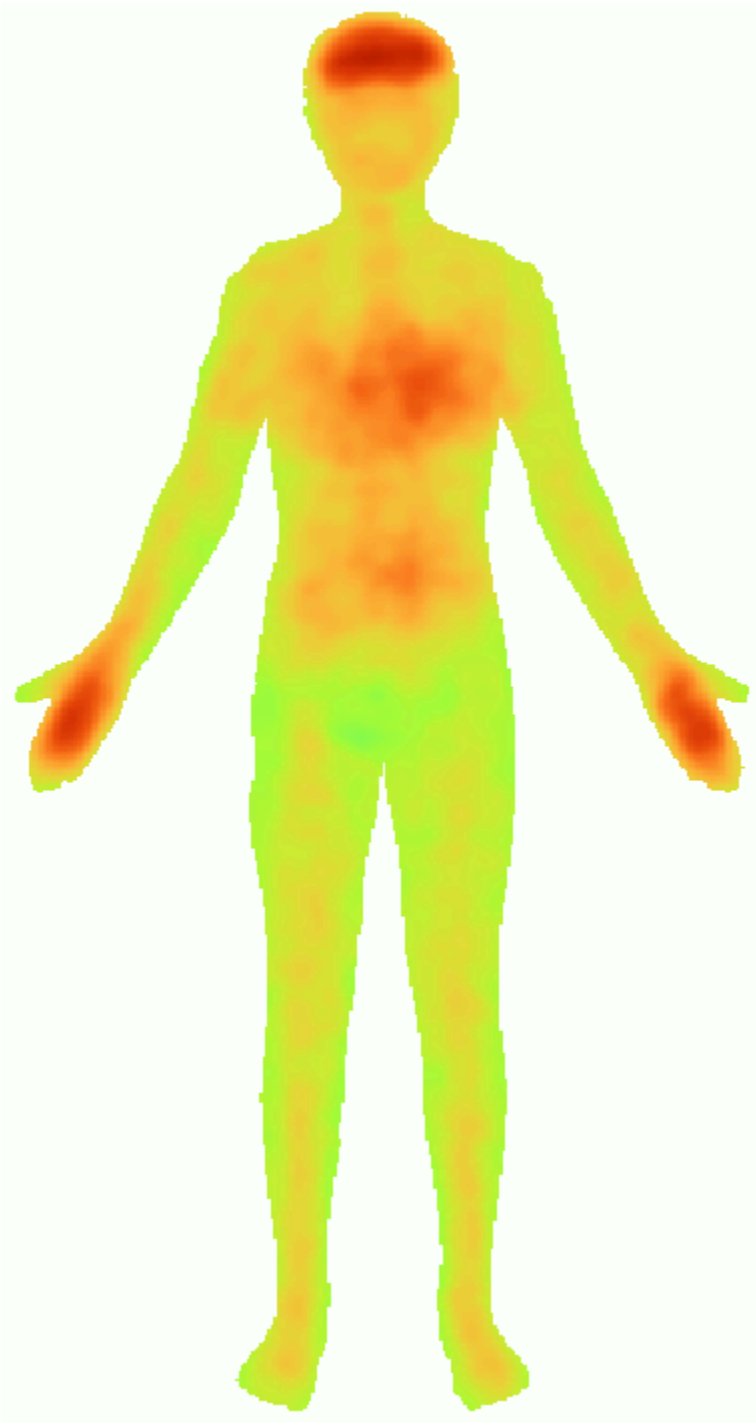

## Nostalgia

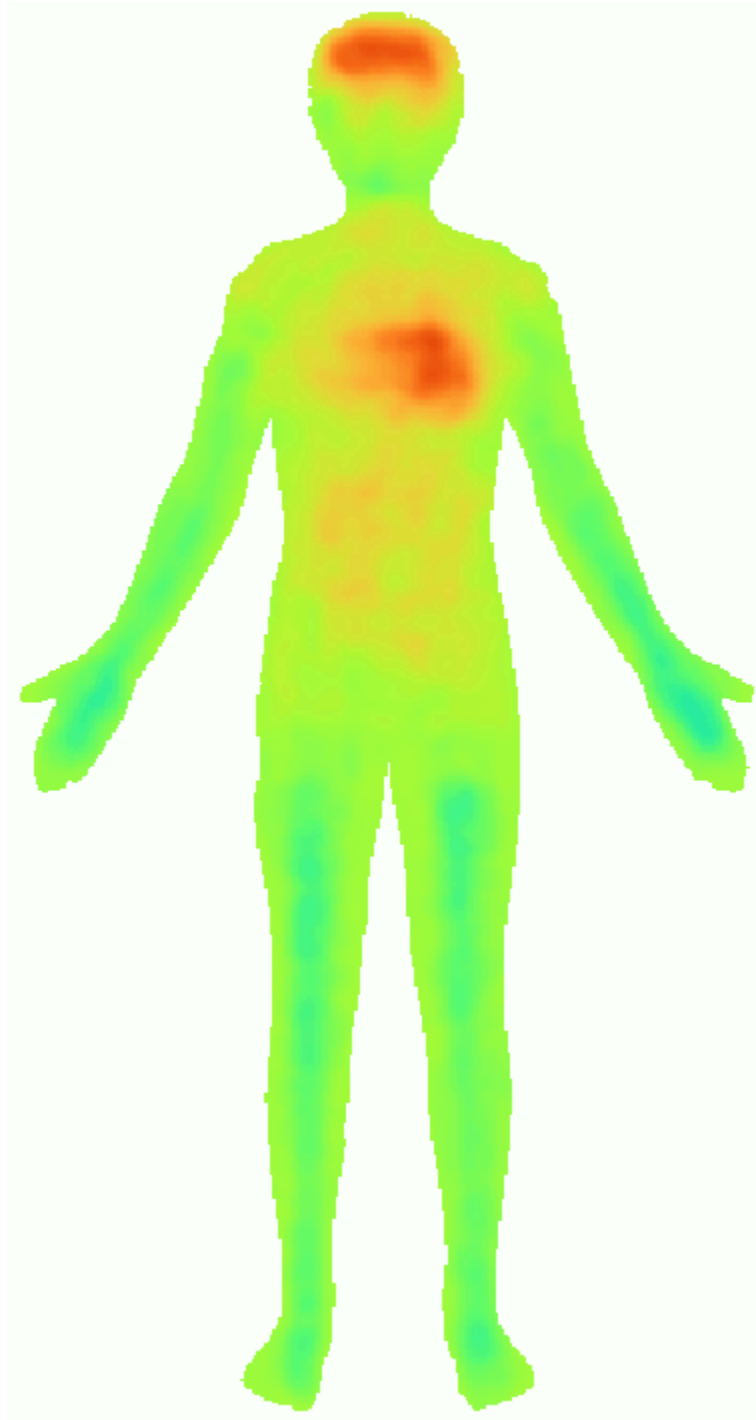

## Panic

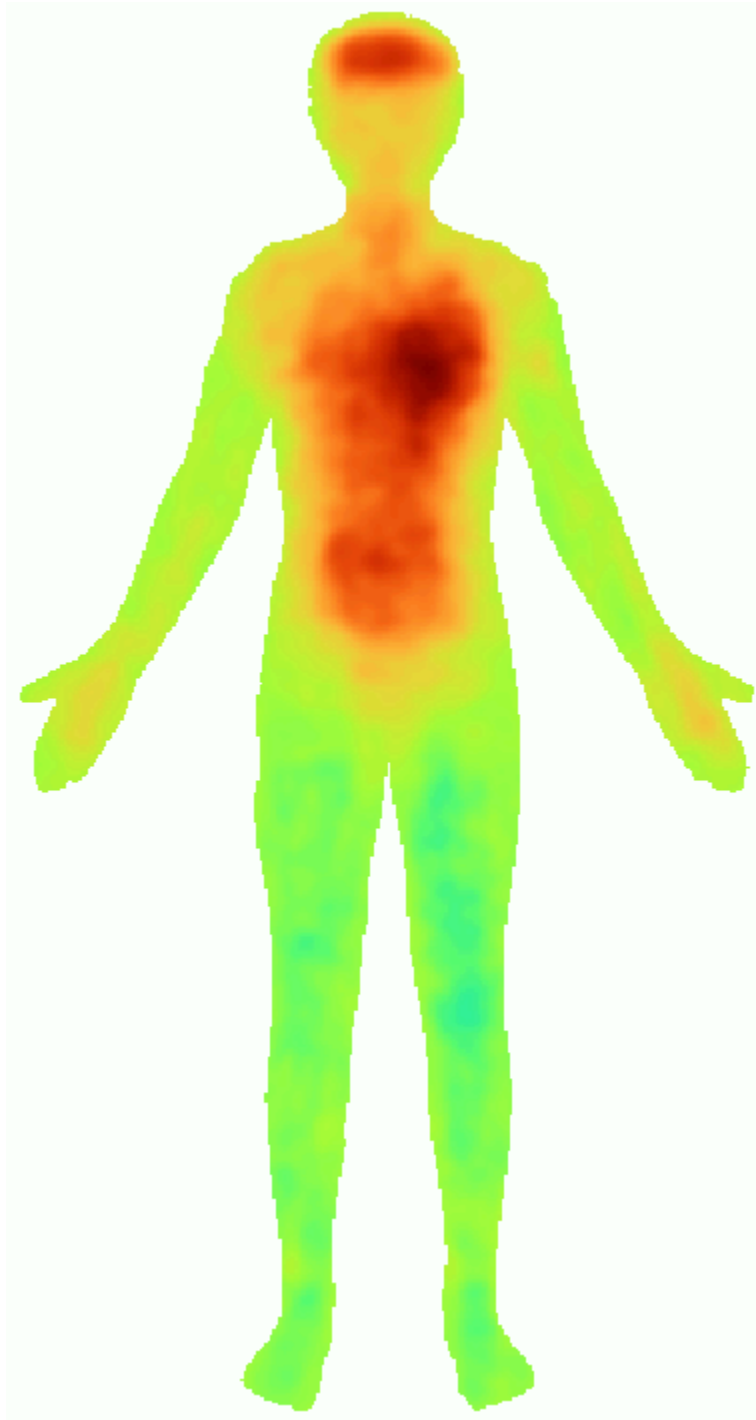

## Pleasure

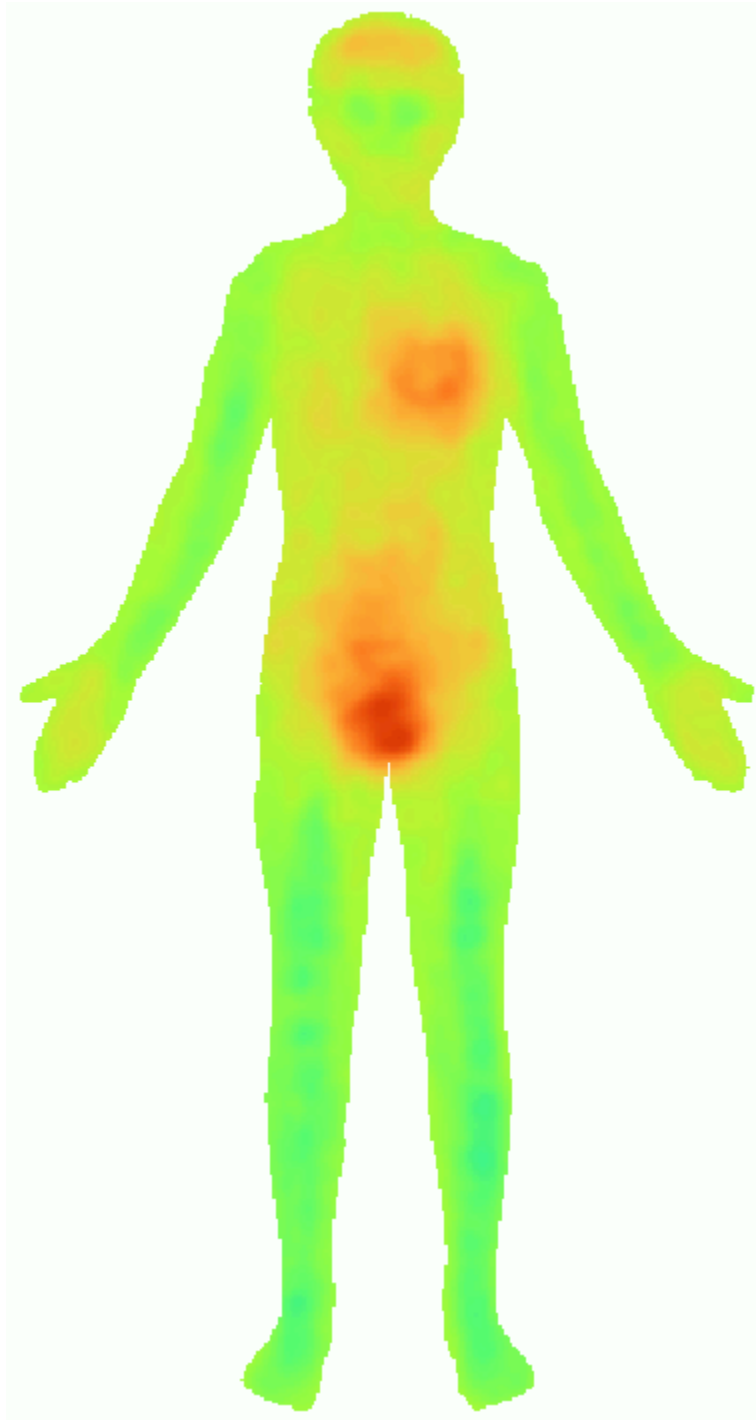

## Pride

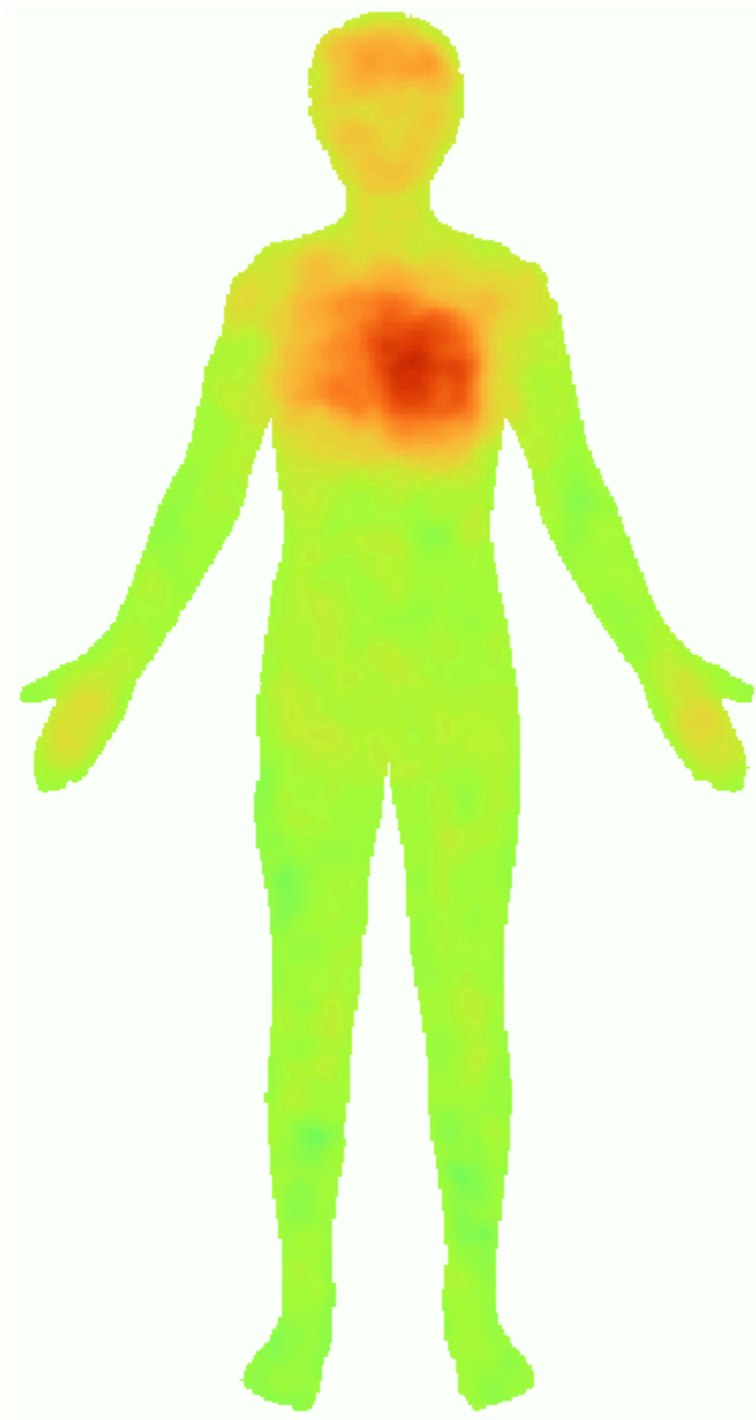

## Relaxation

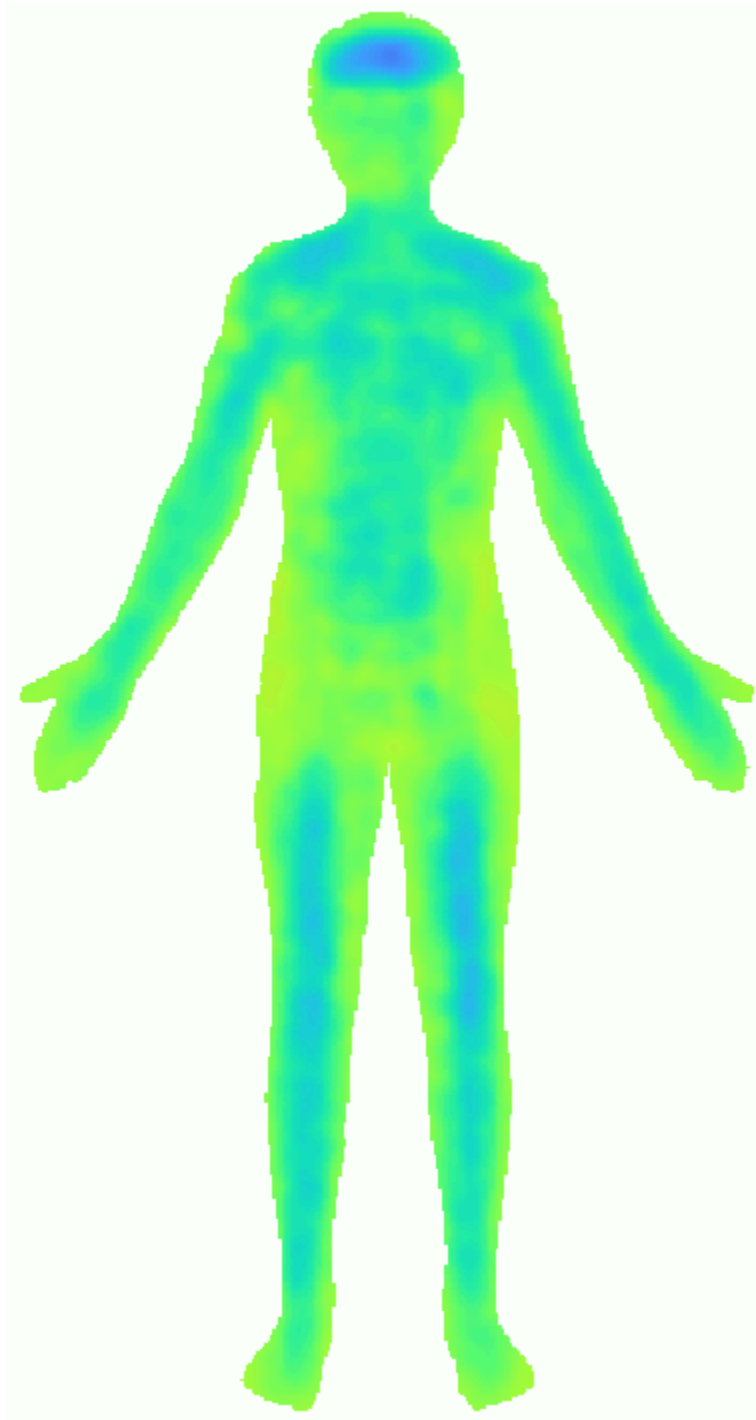

## Relief

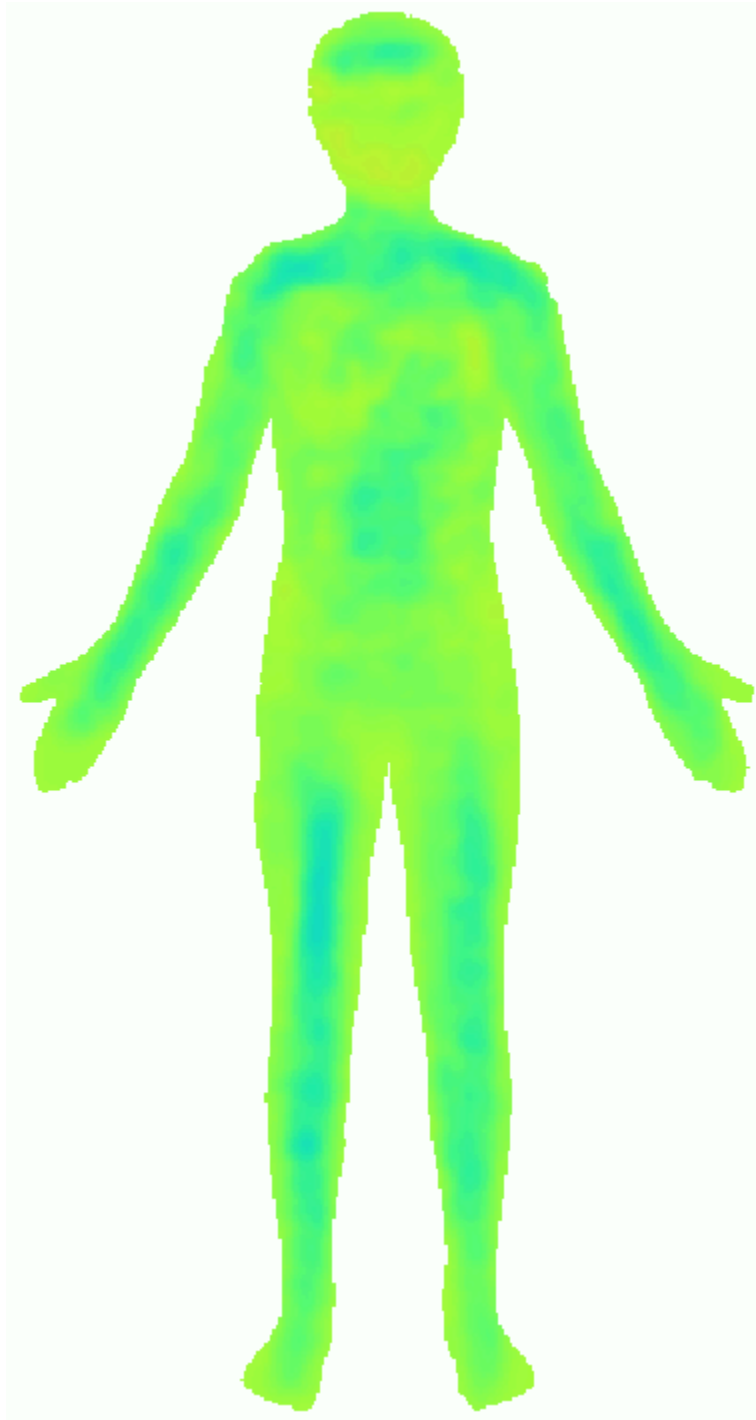

## Respect

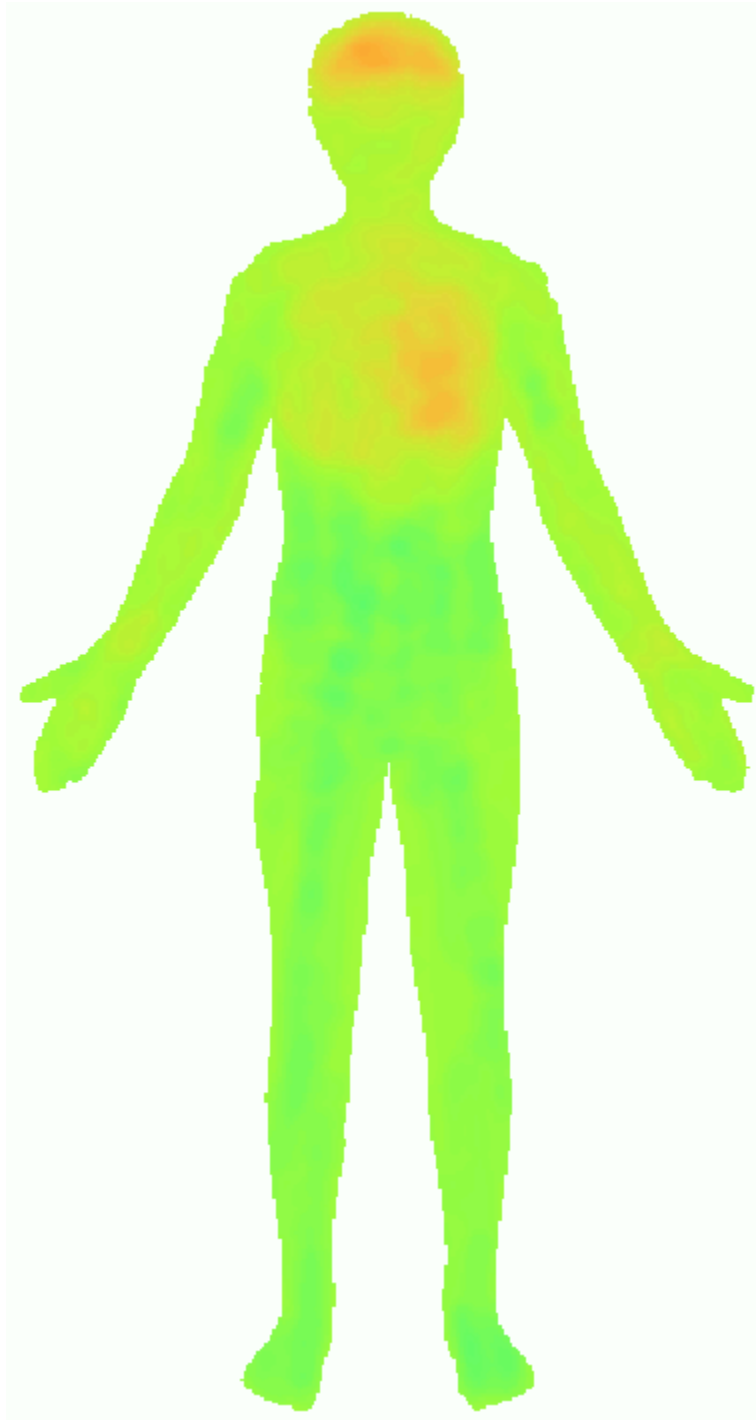

## Sadness

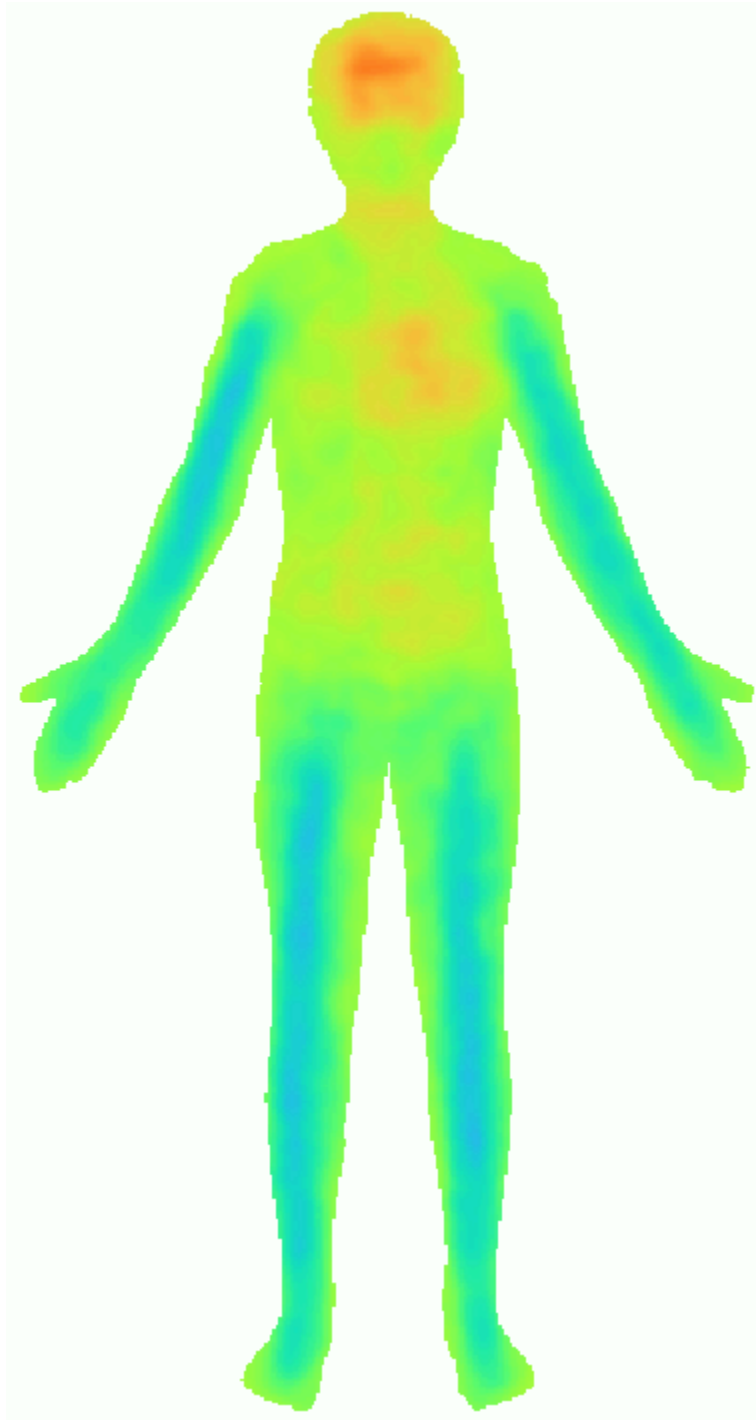

## Satisfaction

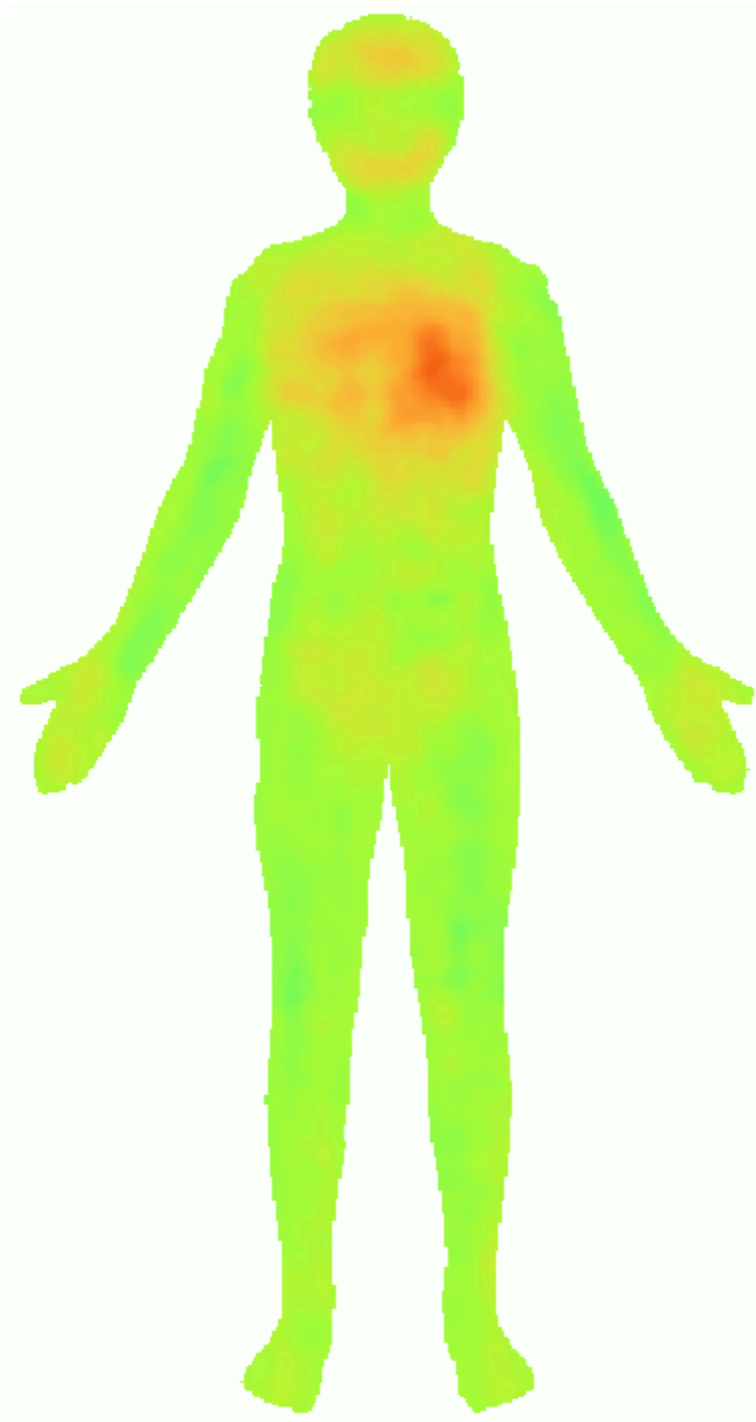

## Sexual pleasure

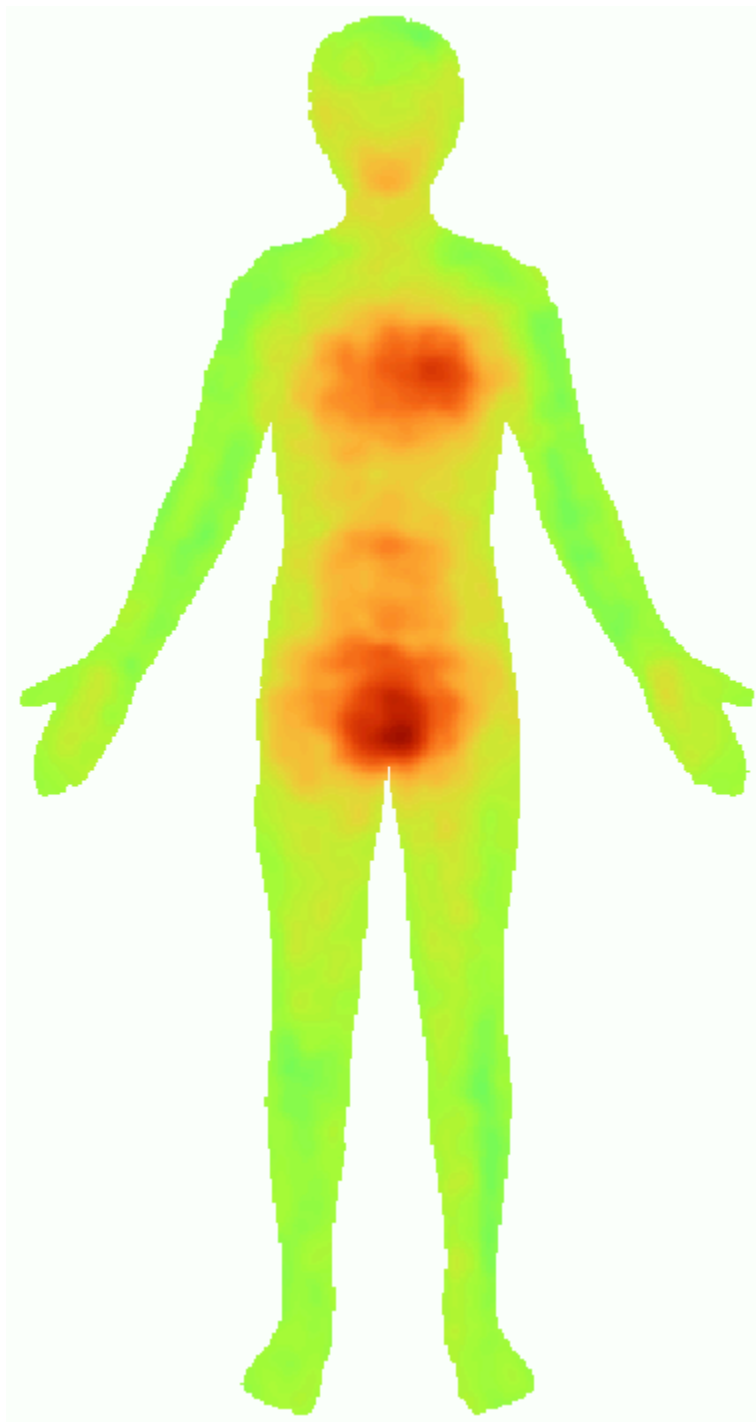

## Shame

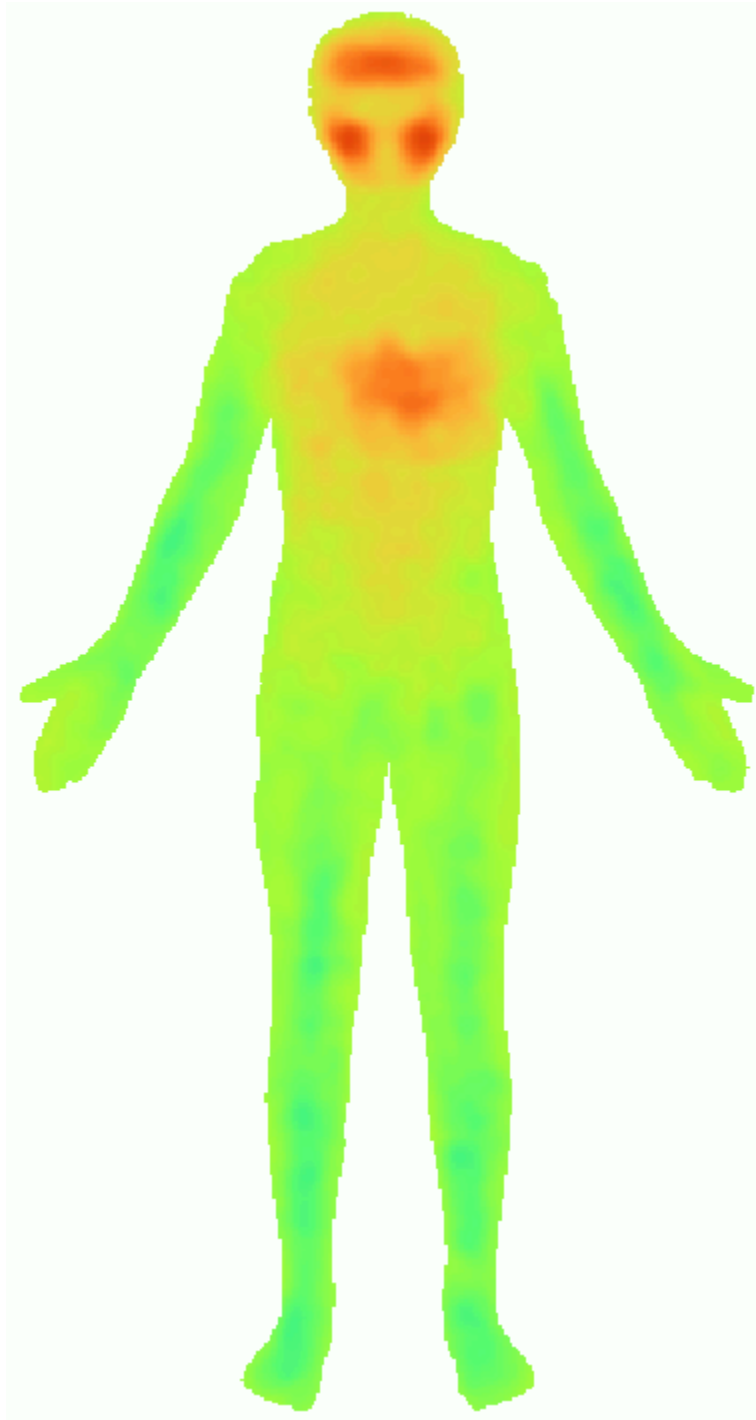

## Skepticism

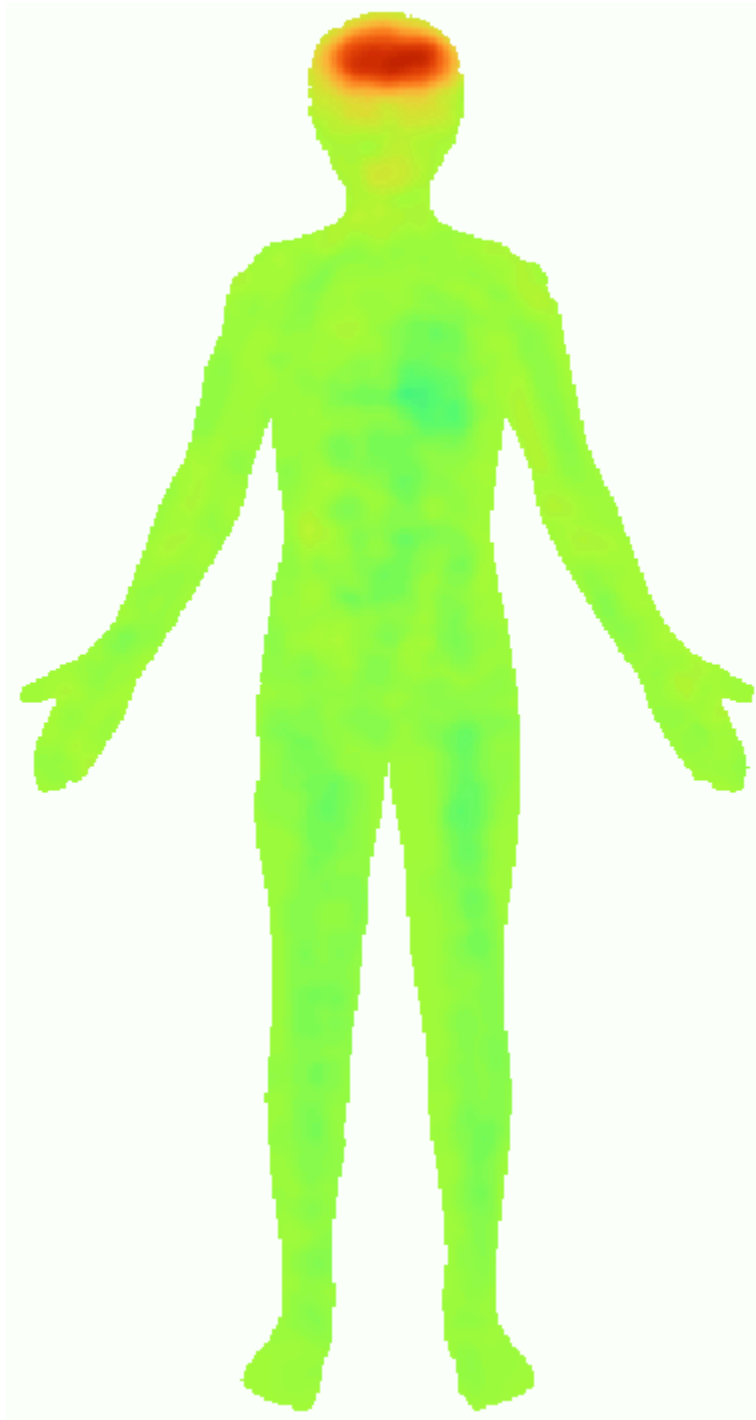

## Sleepiness

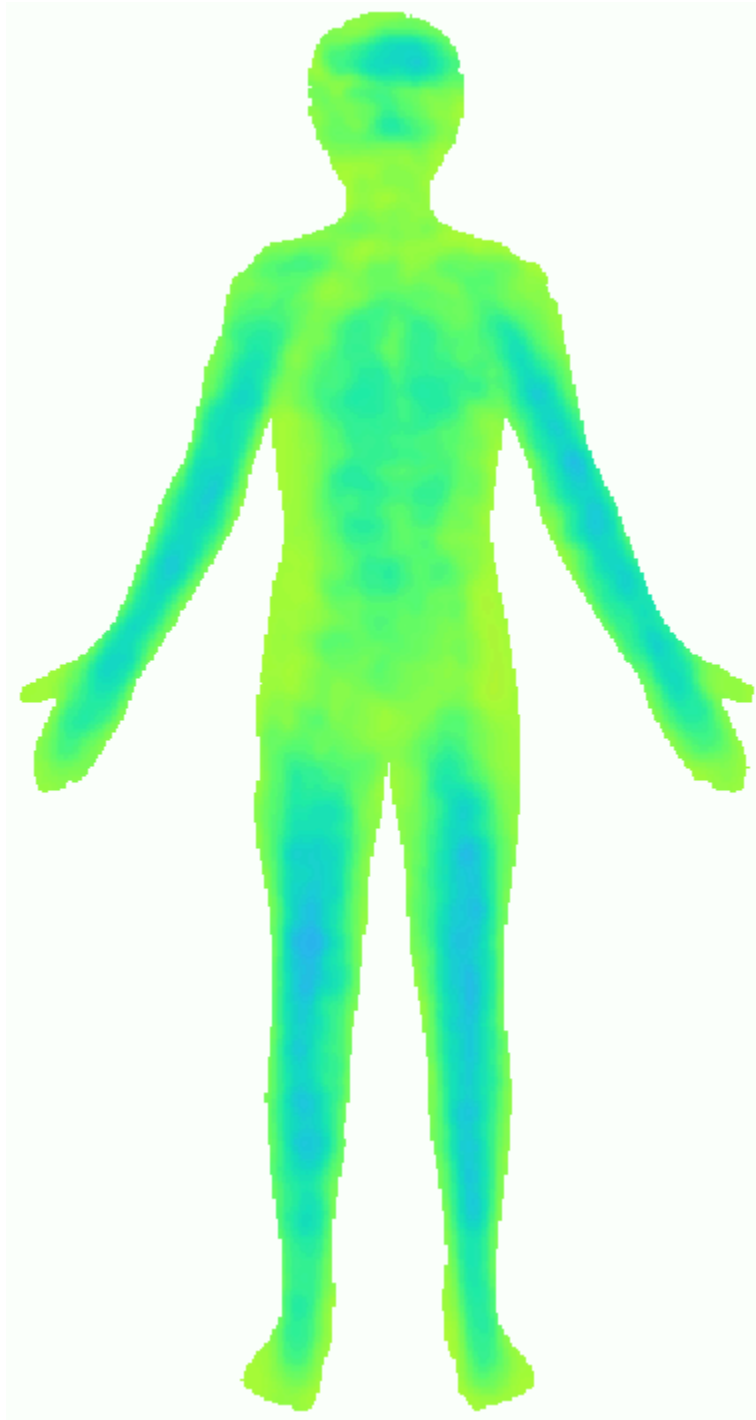

## Stress

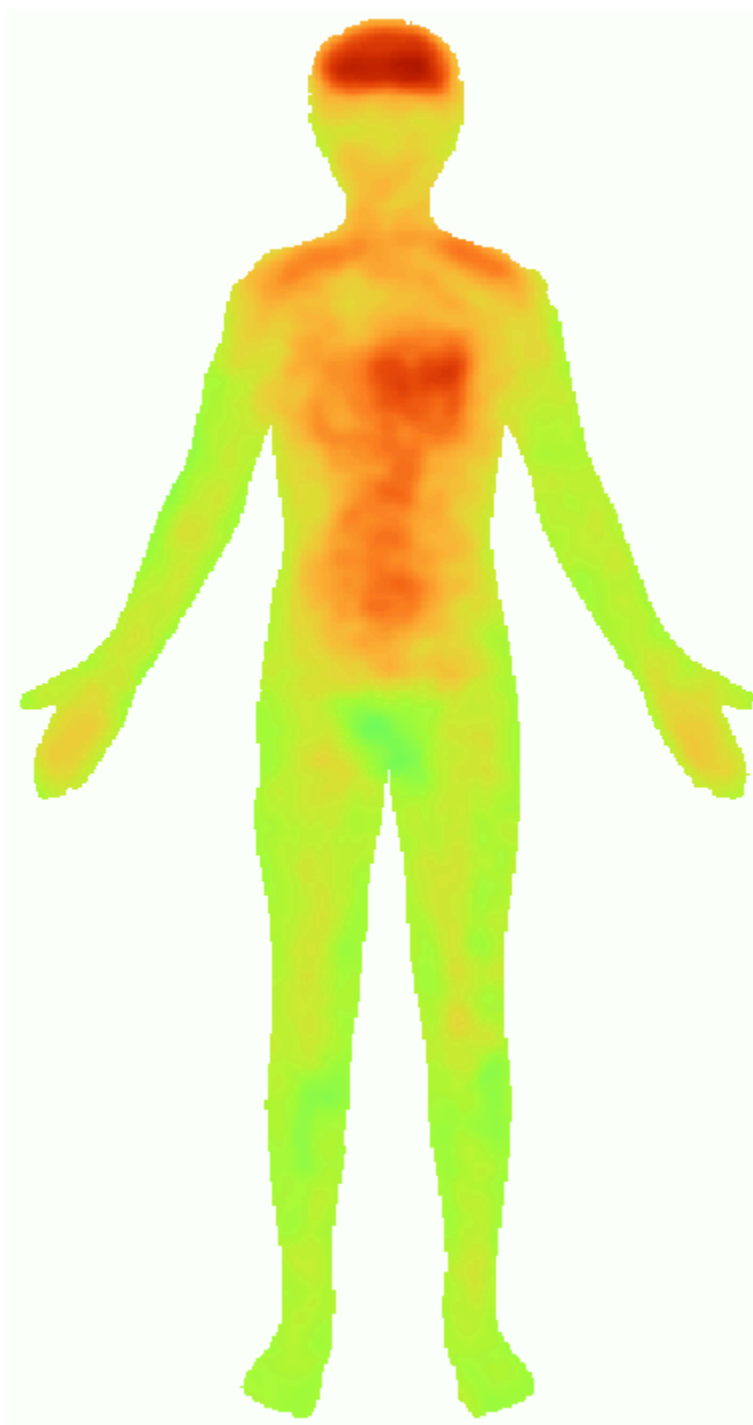

## Surprise

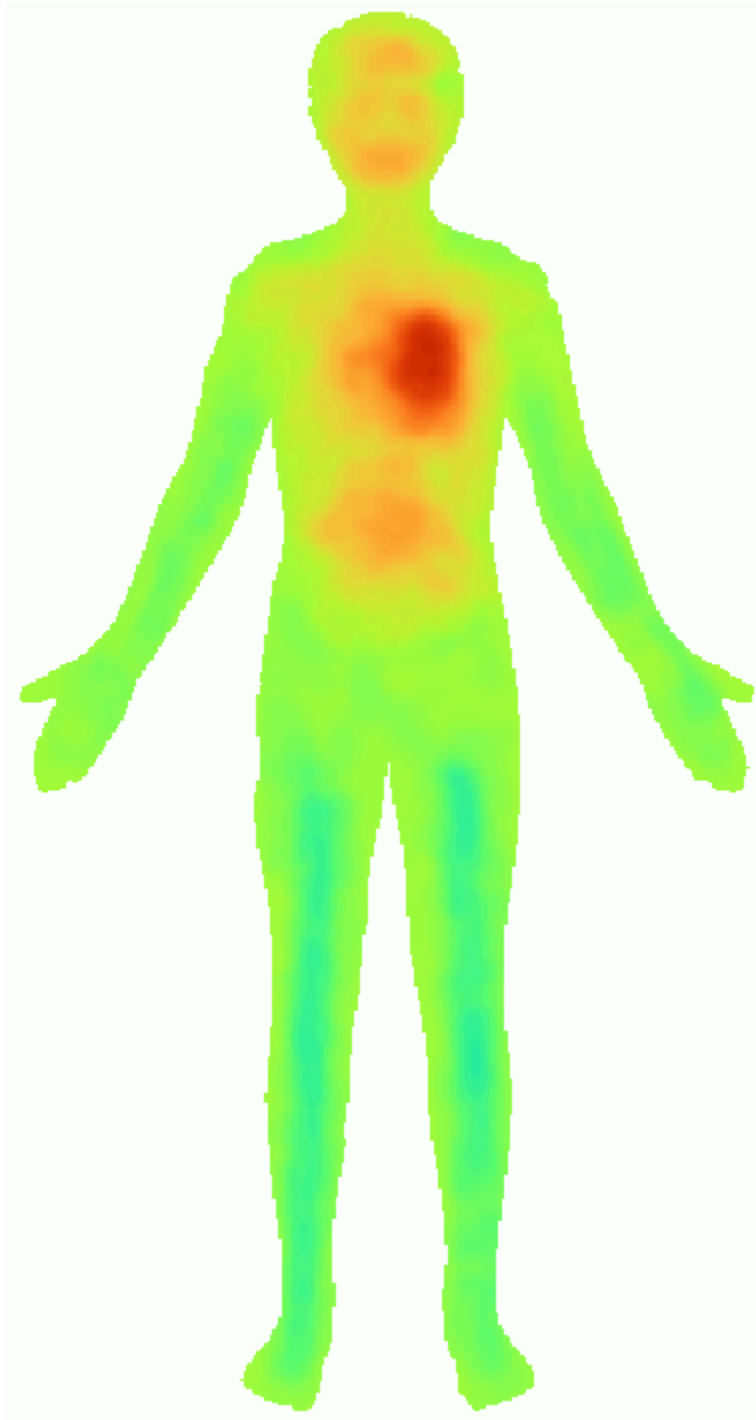

## Terror

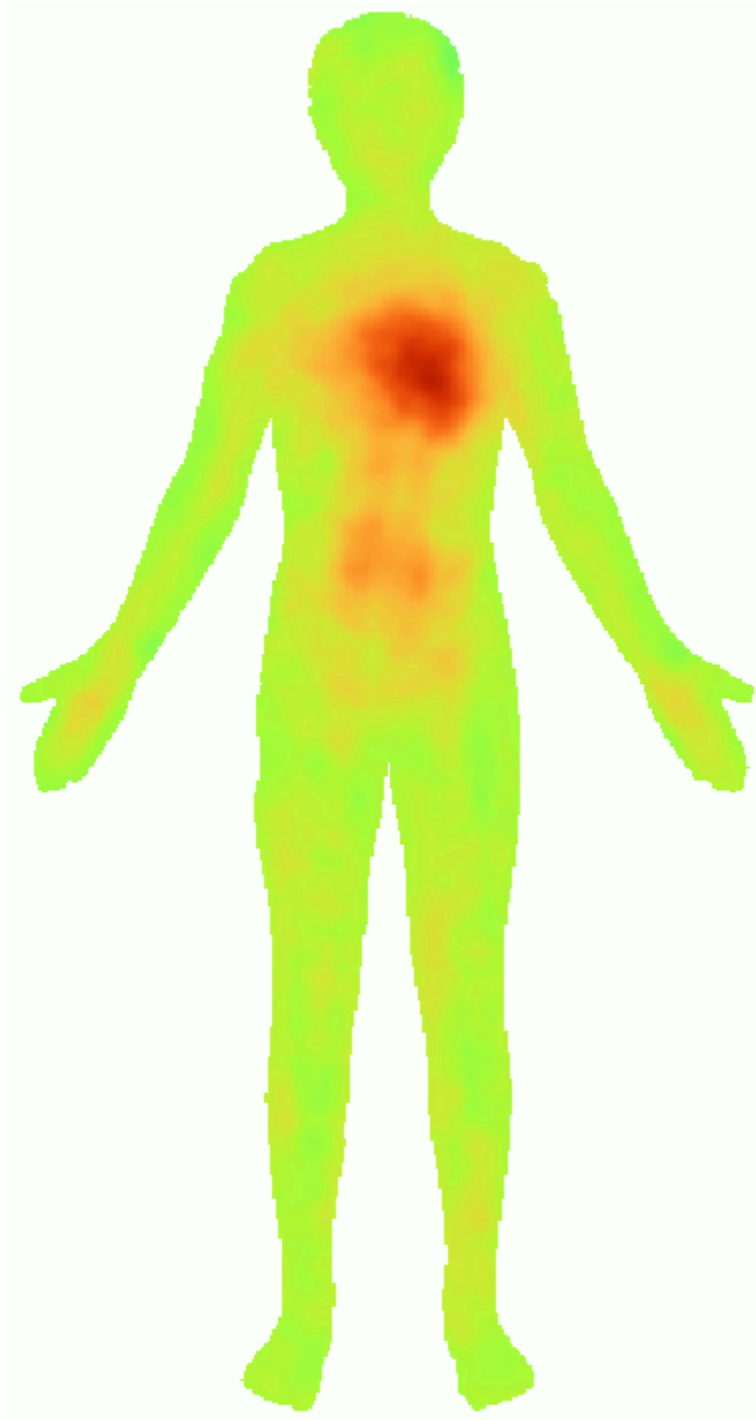

## Tiredness

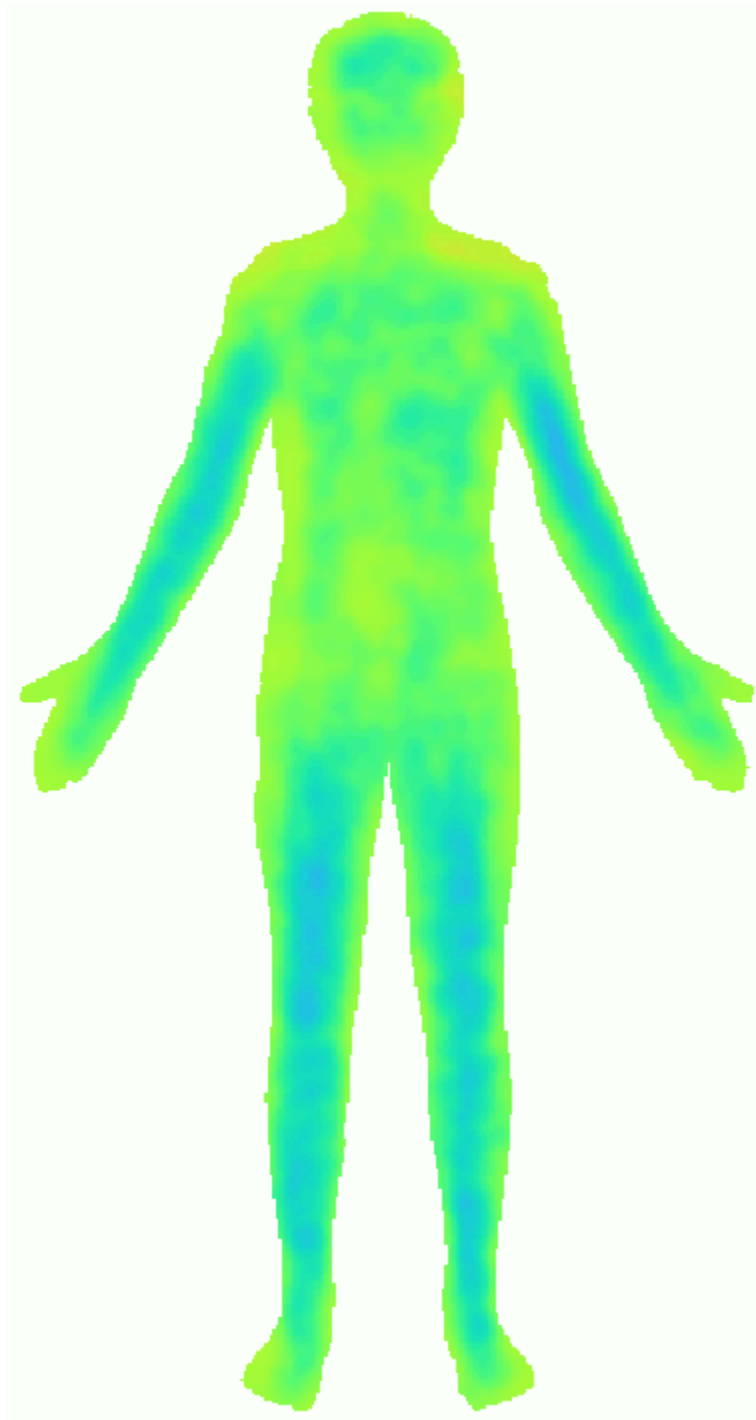

## Trust

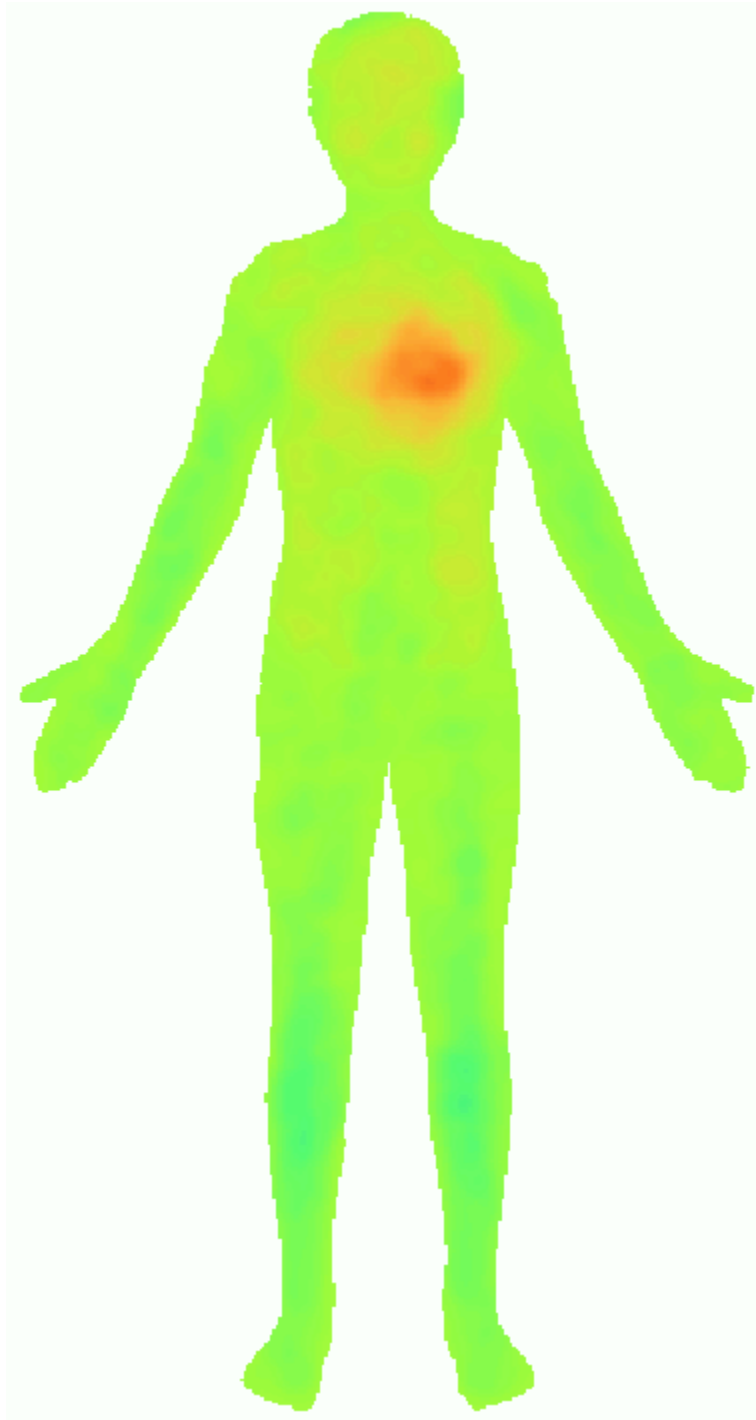

## Uncertainty

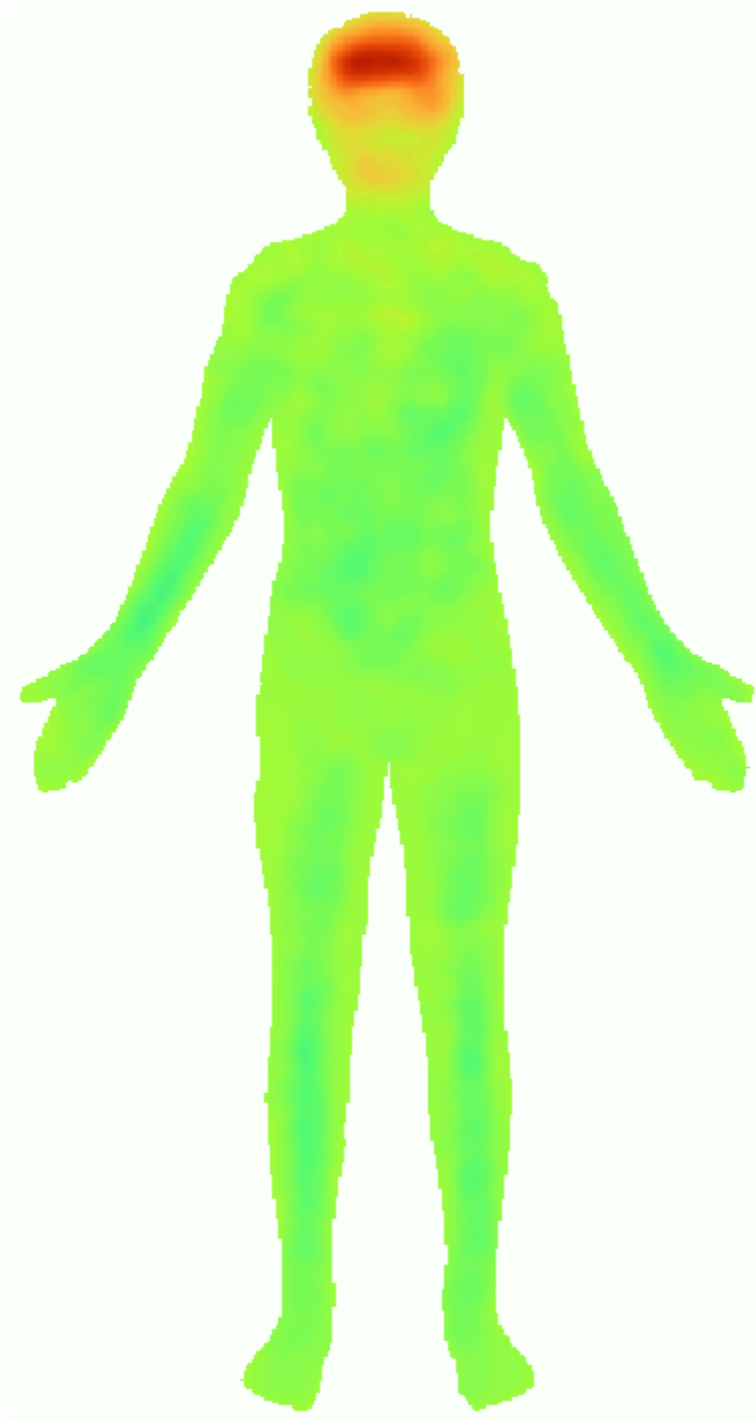

Supplement: Supplementary file 3 [file 5713a20f16fb6208802ac383.pdf]
