# Supplementary material
Source: Research Square preprint supplement (doi:10.21203/rs.3.rs-9402989/v1)
Supplement: Supplementary file 1 [file 21c41dea2ece34a6a58354d5.pdf]

| Item No. | Correct answer  | Primary distractor | Second distractor | Third distractor | Fourth distractor | Participant response               | Score |
|----------|-----------------|--------------------|-------------------|------------------|-------------------|------------------------------------|-------|
| 01.      | affection       | hate               | concern           | amusement        | nostalgia         | [insert participant response here] |       |
| 02.      | aggressiveness  | fury               | shame             | love             | terror            | [insert participant response here] |       |
| 03.      | agitation       | anxiety            | astonishment      | aggressiveness   | chastity          | [insert participant response here] |       |
| 04.      | agony           | affection          | happiness         | astonishment     | cruelty           | [insert participant response here] |       |
| 05.      | anger           | nervousness        | contempt          | uncertainty      | gratitude         | [insert participant response here] |       |
| 06.      | anxiety         | nervousness        | breathlessness    | affection        | impatience        | [insert participant response here] |       |
| 07.      | being touched   | sleepiness         | humiliation       | breathlessness   | disappointment    | [insert participant response here] |       |
| 08.      | breathlessness  | love               | agitation         | confusion        | trust             | [insert participant response here] |       |
| 09.      | concern         | nervousness        | disgust           | joy              | ecstasy           | [insert participant response here] |       |
| 10.      | confusion       | dissatisfaction    | agitation         | fear             | breathlessness    | [insert participant response here] |       |
| 11.      | courage         | terror             | affection         | joy              | ecstasy           | [insert participant response here] |       |
| 12.      | despair         | stress             | sexual pleasure   | affection        | pride             | [insert participant response here] |       |
| 13.      | elation         | stress             | disgust           | love             | amusement         | [insert participant response here] |       |
| 14.      | embarrassment   | ecstasy            | fury              | affection        | skepticism        | [insert participant response here] |       |
| 15.      | fear            | panic              | breathlessness    | being touched    | contempt          | [insert participant response here] |       |
| 16.      | fury            | agitation          | fear              | contempt         | egotism           | [insert participant response here] |       |
| 17.      | gratitude       | compassion         | agitation         | happiness        | breathlessness    | [insert participant response here] |       |
| 18.      | happiness       | agitation          | elation           | respect          | sexual pleasure   | [insert participant response here] |       |
| 19.      | hate            | aggressiveness     | envy              | breathlessness   | gratitude         | [insert participant response here] |       |
| 20.      | impatience      | tiredness          | relief            | generosity       | jealousy          | [insert participant response here] |       |
| 21.      | jealousy        | agitation          | being touched     | disgust          | happiness         | [insert participant response here] |       |
| 22.      | joy             | concern            | love              | elation          | lust              | [insert participant response here] |       |
| 23.      | love            | anxiety            | amusement         | confusion        | surprise          | [insert participant response here] |       |
| 24.      | nervousness     | anger              | hate              | breathlessness   | sexual pleasure   | [insert participant response here] |       |
| 25.      | panic           | concern            | affection         | fury             | being touched     | [insert participant response here] |       |
| 26.      | pride           | happiness          | concern           | confusion        | egotism           | [insert participant response here] |       |
| 27.      | relaxation      | carelessness       | confusion         | ecstasy          | anger             | [insert participant response here] |       |
| 28.      | sexual pleasure | ecstasy            | amusement         | terror*          | chastity          | [insert participant response here] |       |
| 29.      | skepticism      | uncertainty        | despair           | amusement        | breathlessness    | [insert participant response here] |       |
| 30.      | stress          | elation            | contempt          | disgust          | envy              | [insert participant response here] |       |
| 31.      | tiredness       | relief             | sexual pleasure   | love             | chastity          | [insert participant response here] |       |
| 32.      | uncertainty     | stress             | being touched     | despair          | carelessness      | [insert participant response here] |       |

**Note.** Distractors were chosen based on how often they were confused with each target emotion (Study 2). The Primary, Secondary, Tertiary, and Quaternary distractors correspond to items near the 95th, 75th, 50th, and 25th percentiles of confusability distribution, respectively. Asterisks (\*) mark items filtered using a 60th-percentile threshold to avoid scoring repeated zeros for lower-ranked distractors.
