# Supplementary material
Source: Research Square preprint supplement (doi:10.21203/rs.3.rs-9402989/v1)
Supplement: Supplementary file 2 [file 5424e4ec71295e4535dd3a7c.pdf]

| mental state           | avg Jaccard similarity | permutation $p$ (uncorrected) | FDR-corrected $p$ |
|------------------------|------------------------|-------------------------------|-------------------|
| <b>affection</b>       | <b>0.094</b>           | <b>0.000</b>                  | <b>0.003*</b>     |
| <b>aggressiveness</b>  | <b>0.089</b>           | <b>0.000</b>                  | <b>0.003*</b>     |
| <b>agitation</b>       | <b>0.100</b>           | <b>0.000</b>                  | <b>0.003*</b>     |
| <b>agony</b>           | <b>0.088</b>           | <b>0.000</b>                  | <b>0.003*</b>     |
| amusement              | 0.070                  | 0.035                         | 0.261             |
| <b>anger</b>           | <b>0.098</b>           | <b>0.000</b>                  | <b>0.003*</b>     |
| <b>anxiety</b>         | <b>0.110</b>           | <b>0.000</b>                  | <b>0.003*</b>     |
| astonishment           | 0.054                  | 0.736                         | 3.928             |
| <b>being touched</b>   | <b>0.078</b>           | <b>0.001</b>                  | <b>0.016*</b>     |
| <b>breathlessness</b>  | <b>0.111</b>           | <b>0.000</b>                  | <b>0.003*</b>     |
| carelessness           | 0.042                  | 0.997                         | 4.747             |
| caution                | 0.058                  | 0.534                         | 2.950             |
| chastity               | 0.058                  | 0.515                         | 2.895             |
| compassion             | 0.063                  | 0.232                         | 1.493             |
| <b>concern</b>         | <b>0.093</b>           | <b>0.000</b>                  | <b>0.003*</b>     |
| <b>confusion</b>       | <b>0.088</b>           | <b>0.000</b>                  | <b>0.003*</b>     |
| contempt               | 0.054                  | 0.773                         | 4.052             |
| <b>courage</b>         | <b>0.086</b>           | <b>0.000</b>                  | <b>0.003*</b>     |
| cruelty                | 0.058                  | 0.503                         | 2.884             |
| <b>despair</b>         | <b>0.092</b>           | <b>0.000</b>                  | <b>0.003*</b>     |
| disappointment         | 0.060                  | 0.370                         | 2.243             |
| disgust                | 0.070                  | 0.046                         | 0.339             |
| dissatisfaction        | 0.059                  | 0.429                         | 2.504             |
| ecstasy                | 0.061                  | 0.307                         | 1.902             |
| egotism                | 0.051                  | 0.880                         | 4.389             |
| <b>elation</b>         | <b>0.089</b>           | <b>0.000</b>                  | <b>0.003*</b>     |
| <b>embarrassment</b>   | <b>0.079</b>           | <b>0.002</b>                  | <b>0.022*</b>     |
| envy                   | 0.071                  | 0.032                         | 0.251             |
| <b>fear</b>            | <b>0.084</b>           | <b>0.000</b>                  | <b>0.003*</b>     |
| <b>fury</b>            | <b>0.090</b>           | <b>0.000</b>                  | <b>0.003*</b>     |
| generosity             | 0.071                  | 0.029                         | 0.228             |
| <b>gratitude</b>       | <b>0.076</b>           | <b>0.005</b>                  | <b>0.046*</b>     |
| guilt                  | 0.074                  | 0.009                         | 0.081             |
| <b>happiness</b>       | <b>0.082</b>           | <b>0.001</b>                  | <b>0.008*</b>     |
| <b>hate</b>            | <b>0.084</b>           | <b>0.001</b>                  | <b>0.008*</b>     |
| hope                   | 0.070                  | 0.054                         | 0.390             |
| horror                 | 0.060                  | 0.412                         | 2.448             |
| humbleness             | 0.043                  | 0.990                         | 4.747             |
| humiliation            | 0.066                  | 0.123                         | 0.826             |
| <b>impatience</b>      | <b>0.082</b>           | <b>0.001</b>                  | <b>0.010*</b>     |
| indifference           | 0.047                  | 0.955                         | 4.687             |
| <b>jealousy</b>        | <b>0.078</b>           | <b>0.003</b>                  | <b>0.029*</b>     |
| <b>joy</b>             | <b>0.090</b>           | <b>0.000</b>                  | <b>0.003*</b>     |
| <b>love</b>            | <b>0.128</b>           | <b>0.000</b>                  | <b>0.003*</b>     |
| lust                   | 0.063                  | 0.237                         | 1.493             |
| <b>nervousness</b>     | <b>0.092</b>           | <b>0.000</b>                  | <b>0.003*</b>     |
| nostalgia              | 0.075                  | 0.006                         | 0.056             |
| <b>panic</b>           | <b>0.113</b>           | <b>0.000</b>                  | <b>0.003*</b>     |
| pleasure               | 0.076                  | 0.009                         | 0.081             |
| <b>pride</b>           | <b>0.082</b>           | <b>0.000</b>                  | <b>0.006*</b>     |
| <b>relaxation</b>      | <b>0.082</b>           | <b>0.000</b>                  | <b>0.006*</b>     |
| relief                 | 0.065                  | 0.149                         | 0.981             |
| respect                | 0.051                  | 0.853                         | 4.325             |
| sadness                | 0.067                  | 0.084                         | 0.592             |
| satisfaction           | 0.056                  | 0.631                         | 3.427             |
| <b>sexual pleasure</b> | <b>0.084</b>           | <b>0.000</b>                  | <b>0.006*</b>     |
| shame                  | 0.066                  | 0.105                         | 0.719             |
| <b>skepticism</b>      | <b>0.081</b>           | <b>0.002</b>                  | <b>0.026*</b>     |
| sleepiness             | 0.073                  | 0.019                         | 0.157             |
| <b>stress</b>          | <b>0.089</b>           | <b>0.000</b>                  | <b>0.003*</b>     |
| surprise               | 0.072                  | 0.019                         | 0.158             |
| terror                 | 0.073                  | 0.013                         | 0.112             |
| <b>tiredness</b>       | <b>0.082</b>           | <b>0.001</b>                  | <b>0.016*</b>     |
| trust                  | 0.053                  | 0.799                         | 4.120             |
| <b>uncertainty</b>     | <b>0.078</b>           | <b>0.005</b>                  | <b>0.046*</b>     |

Note. Significance based on FDR-corrected  $p$ -values: \*  $p < .05$
