# Supplementary material
Source: Research Square preprint supplement (doi:10.21203/rs.3.rs-9402989/v1)
Supplement: Supplementary file 4 [file 8b63206497d213a6ba902088.pdf]

| n cluster | mental states                                                                                      | intra-confusion rate | inter-confusion rate | t-value     | p (non-param) | p (Bonferroni) | functional profile                                                                                                                                                          |
|-----------|----------------------------------------------------------------------------------------------------|----------------------|----------------------|-------------|---------------|----------------|-----------------------------------------------------------------------------------------------------------------------------------------------------------------------------|
| 1         | uncertainty, caution, skepticism                                                                   | 0.26 ± 0.15          | 0.13 ± 0.13          | 2.50        | 0.1725        | 2.3629         | Negative valence, low arousal, avoidance; ambiguity monitoring                                                                                                              |
| 2         | confusion, contempt, egotism, embarrassment, envy, respect, astonishment, humiliation              | 0.21 ± 0.16          | 0.13 ± 0.12          | 3.64        | 0.0392        | 0.4783         | Mixed valence/arousal; social comparison & self-conscious monitoring (Tracy & Robins, 2004; Feinberg et al., 2012; Fischer & Giner-Sorolla, 2016; Smith & Kim, 2007)        |
| <b>3</b>  | <b>agony, anxiety, jealousy, panic, fear, concern, stress</b>                                      | <b>0.29 ± 0.15</b>   | <b>0.15 ± 0.13</b>   | <b>6.85</b> | <b>0.0002</b> | <b>0.0026*</b> | Negative valence, high arousal, avoidance; threat detection (Öhman & Mineka, 2001; Mobbs et al., 2009; Lang et al, 2000; Blanchard & Blanchard, 2008; LeDoux, 2012)         |
| 4         | lust, cruelty                                                                                      | 0.21 ± 0.17          | 0.14 ± 0.12          | 0.76        | 0.2673        | 3.7991         | Ambivalent valence, high arousal, mixed motives; dominance or impulsivity                                                                                                   |
| 5         | indifference, carelessness                                                                         | 0.47 ± 0.26          | 0.09 ± 0.13          | 2.92        | 0.1797        | 2.2447         | Neutral/negative valence, low arousal; disengagement                                                                                                                        |
| <b>6</b>  | <b>relaxation, relief, sleepiness, tiredness</b>                                                   | <b>0.45 ± 0.21</b>   | <b>0.10 ± 0.12</b>   | <b>6.76</b> | <b>0.0002</b> | <b>0.0078*</b> | Mixed valence, low arousal, passive; recovery and energy conservation (Benson & Klipper, 2000)                                                                              |
| 7         | ecstasy, sexual pleasure, pleasure                                                                 | 0.48 ± 0.29          | 0.09 ± 0.09          | 4.17        | 0.0192        | 0.1794         | Positive valence, high arousal, approach; reward processing (Kringelbach, 2005 & 2010)                                                                                      |
| 8         | sadness                                                                                            | —                    | 0.15 ± 0.11          | —           | —             | 11.712         | Negative valence, low arousal, withdrawal; social signaling of loss (Coke et al., 1978; Bonanno et al., 2008)                                                               |
| 9         | disappointment, disgust, despair, dissatisfaction, nostalgia, horror, guilt, shame                 | 0.18 ± 0.16          | 0.14 ± 0.12          | 2.03        | 0.6577        | 8.6615         | Negative valence, mixed arousal; social and moral evaluation (Rozin et al., 2009; Tangney et al. 2007; Haidt, 2003; Gruenewald et al., 2004; Lewis & Sullivan, 2005)        |
| <b>10</b> | <b>affection, love, courage, amusement, happiness, joy, gratitude, pride, satisfaction, terror</b> | <b>0.23 ± 0.14</b>   | <b>0.15 ± 0.13</b>   | <b>5.04</b> | <b>0.0030</b> | <b>0.0312*</b> | Positive valence, mixed arousal, approach; social bonding & achievement (Fredrickson, 2004; Gordon et al. 2012; Tracy & Robins, 2007; Dunbar, 2022; Krumhuber et al., 2007) |
| 11        | chastity                                                                                           | —                    | 0.11 ± 0.16          | —           | —             | 5.4979         | Ambivalent valence; potentially moral or identity-related                                                                                                                   |
| <b>12</b> | <b>breathlessness, being touched, compassion, trust, generosity, surprise, hope, humbleness</b>    | <b>0.23 ± 0.14</b>   | <b>0.13 ± 0.12</b>   | <b>5.14</b> | <b>0.0012</b> | <b>0.0182*</b> | Positive valence, low-moderate arousal, prosocial approach; affiliation & care (Goetz et al., 2010; Stellar et al., 2017)                                                   |
| <b>13</b> | <b>aggressiveness, agitation, elation, fury, impatience, nervousness, hate, anger</b>              | <b>0.31 ± 0.17</b>   | <b>0.12 ± 0.12</b>   | <b>8.80</b> | <b>0.0002</b> | <b>0.0026*</b> | Mixed valence, high arousal, approach/attack; resources mobilization & action readiness (Carver & Harmon-Jones, 2009; Roseman, 2018; Levenson et al., 1990)                 |

Note. Bonferroni-corrected p-values were computed as  $p(\text{non param}) \times k$ , where  $k$  denotes the number of clusters. Asterisks indicate statistically significant results after correction:  $p(\text{Bonferroni}) < .05$ .

**References:** Benson, H., & Klipper, M. Z. (2000). *The relaxation response*. New York, NY: HarperCollins; Blanchard, D. C., & Blanchard, R. J. (2008). Defensive behaviors, fear, and anxiety. In R. J. Blanchard, D. C. Blanchard, G. Griebel, & D. Nutt (Eds.), *Handbook of anxiety and fear* (pp. 63–79). Elsevier Academic Press; Bonanno, G. A., Goorin, L., & Coifman, K. G. (2008). *Sadness and grief*. *Handbook of emotions*, 3, 797–806; Carver, C. S., & Harmon-Jones, E. (2009). Anger is an approach-related affect: Evidence and implications. *Psychological Bulletin*, 135(2), 183–204; Coke, J. S., Batson, C. D., & McDavis, K. (1978). Empathic mediation of helping: A two-stage model. *Journal of Personality and Social Psychology*, 36, 752–766; Dunbar, R. I. M. (2022). *Laughter and its role in the evolution of human social bonding*. *Philosophical Transactions of the Royal Society B: Biological Sciences*, 377(1863), 20210176; Feinberg, M., Willer, R., & Keltner, D. (2012). Flustered and faithful: Embarrassment as a signal of prosociality. *Journal of Personality and Social Psychology*, 102(1), 81; Fischer, A., & Giner-Sorolla, R. (2016). Contempt: Derogating others while keeping calm. *Emotion Review*, 8(4), 346–357; Fredrickson, B. L. (2004). *The broaden-and-build theory of positive emotions*. *Philosophical Transactions of the Royal Society B: Biological Sciences*, 359(1449), 1367–1378; Goetz, J. L., Keltner, D., & Simon-Thomas, E. (2010). Compassion: An evolutionary analysis and empirical review. *Psychological Bulletin*, 136(3), 351–374; Gordon, A. M., Impett, E. A., Kogan, A., Oveis, C., & Keltner, D. (2012). To have and to hold: Gratitude promotes relationship maintenance in intimate bonds. *Journal of Personality and Social Psychology*, 103(2), 257–274; Gruenewald, T. L., Kemeny, M. E., Aziz, N., & Fahey, J. L. (2004). Acute threat to the social self: Shame, social self-esteem, and cortisol activity. *Psychosomatic Medicine*, 66, 915–924; Haidt, J. (2003). *The moral emotions*. In R. J. Davidson, K. R. Scherer, & H. H. Goldsmith (Eds.), *Handbook of affective sciences* (pp. 852–870). Oxford University Press; Kringelbach, M. L. (2005). *The human orbitofrontal cortex: Linking reward to hedonic experience*. *Nature Reviews Neuroscience*, 6(9), 691–702; Kringelbach, M. L. (2010). *The hedonic brain: A functional neuroanatomy of human pleasure*. In M. L. Kringelbach & K. C. Berridge (Eds.), *Pleasures of the brain* (pp. 202–221). Oxford University Press; Krumhuber, E., Manstead, A. S. R., Cosker, D., Marshall, D., Rosin, P. L., & Kappas, A. (2007). Facial dynamics as indicators of trustworthiness and cooperative behavior. *Emotion*, 7, 730–735; Lang, P. J., Davis, M., & Öhman, A. (2000). *Fear and anxiety: Animal models and human cognitive psychophysiology*. *Journal of Affective Disorders*, 61(3), 137–159; LeDoux, J. (2012). *Rethinking the emotional brain*. *Neuron*, 73(4), 653–676; Levenson, R. W., Ekman, P., & Friesen, W. V. (1990). Voluntary facial action generates emotion-specific autonomic nervous system activity. *Psychophysiology*, 27, 363–384; Lewis, M., & Sullivan, M. (2005). *The development of self-conscious emotions*. In A. Elliott & C. Dweck (Eds.), *Handbook of competence and motivation* (pp. 185–201). Guilford Press; Mobbs, D., Marchant, J. L., Hassabis, D., Seymour, B., Tan, G., Gray, M., Petrovic, P., Dolan, R. J., & Frith, C. D. (2009). From threat to fear: The neural organization of defensive fear systems in humans. *Journal of Neuroscience*, 29(39), 12236–12243; Öhman, A., & Mineka, S. (2001). *Fears, phobias, and preparedness: Toward an evolved module of fear and fear learning*. *Psychological Review*, 108(3), 483–522.; Roseman, I. J. (2018). *Functions of anger in the emotion system*. In H. C. Lench (Ed.), *The function of emotions: When and why emotions help us* (pp. 141–173). Springer; Rozin, P., Haidt, J., & Fincher, K. (2009). From oral to moral. *Science*, 323(5918), 1179–1180; Stellar, J. E., Gordon, A. M., Piff, P. K., Cordero, D., Anderson, C. L., Bai, Y., Maruskin, L. A., & Keltner, D. (2017). Self-transcendent emotions and their social functions: Compassion, gratitude, and awe bind us to others through prosociality. *Emotion Review*, 9(3), 200–207; Tangney, J. P., Stuewig, J., & Mashek, D. J. (2007). *Moral emotions and moral*
