# Supplementary material
Source: Research Square preprint supplement (doi:10.21203/rs.3.rs-9402989/v1)
Supplement: Supplementary file 5 [file a745ba123a56a88b522ff00a.pdf]

# Bodily Maps of Mental States Test (BMMST-32)

*Erika Bucci<sup>1</sup>, Giacomo Handjaras<sup>2</sup>, Luca Cecchetti<sup>1</sup>, Giada Lettieri<sup>3</sup>*

1. Social and Affective Neuroscience (SANE) group, MoMiLab, IMT School for Advanced Studies Lucca, Lucca, Italy 2. Methods for Advanced Biosignal Analyses (MABA) group, MoMiLab, IMT School for Advanced Studies Lucca, Lucca, Italy 3. Affective Physiology and Interoception (API) group, MoMiLab, IMT School for Advanced Studies Lucca, Lucca, Italy

The present test assesses your ability to recognize mental states based on bodily sensations. Please read the following instructions carefully before proceeding.

You will be presented with a series of **32 human figures** colored along a scale from red to blue, with green representing intermediate values. These figures depict *Bodily Sensation Maps* (BSMs) associated with different mental states. Each BSM represents the typical pattern of bodily activity reported by individuals when experiencing a specific mental state.

- **Red** regions indicate areas in which individuals generally report an **increase** in bodily activity when experiencing the corresponding mental state.
- **Blue** regions indicate areas in which individuals generally report a **decrease** in bodily activity.
- **Green** regions indicate areas in which individuals report **no significant change** in activity.

Your task is **to select the mental state** that best corresponds to each bodily map.

For each map, choose one option from the five available.

An example of the task is provided below.

*Which mental state does this bodily map depict?*

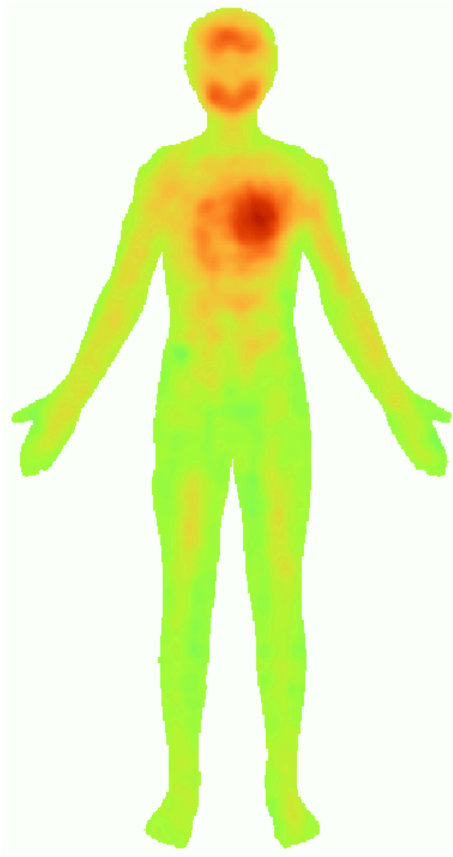

activation

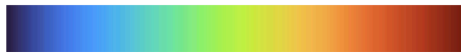

decrease    no change    increase

~~1) Option 1~~

2) Option 2

3) Option 3

4) Option 4

5) Option 5

***Note for test administration:*** Items in this version are presented in alphabetical order for reference purposes only. When administering the BMMST, please randomize the order of presentation to avoid potential order effects. A response sheet is provided separately (BMMST\_response\_sheet.xlsx).

---

01. Which mental state does this bodily map depict?

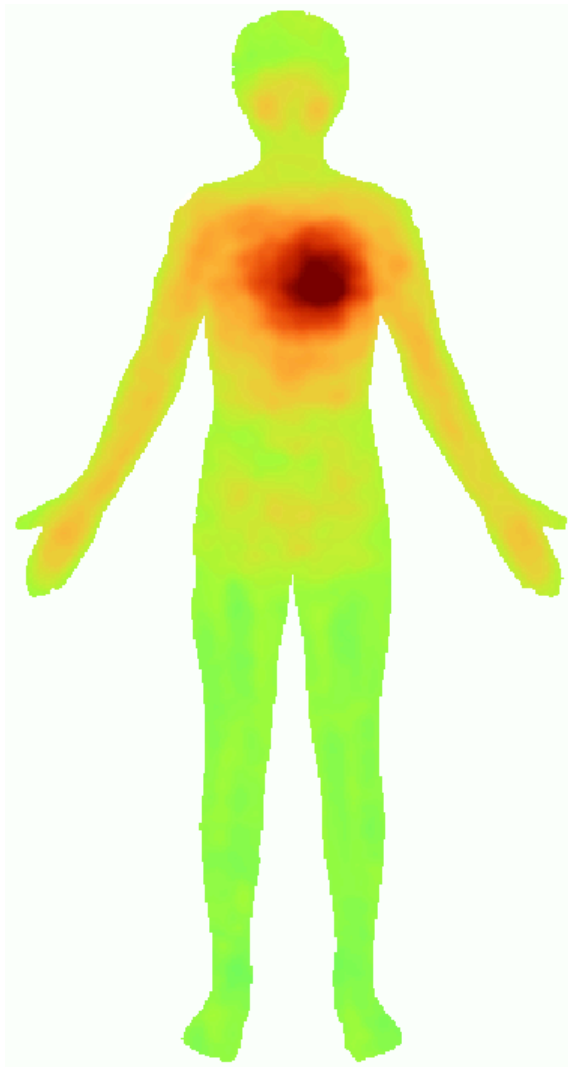

- 1) concern
- 2) nostalgia
- 3) affection
- 4) amusement
- 5) hate

**activation**

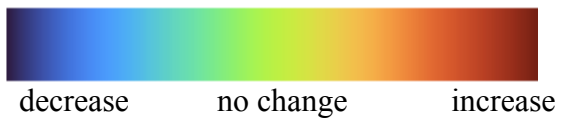

02. Which mental state does this bodily map depict?

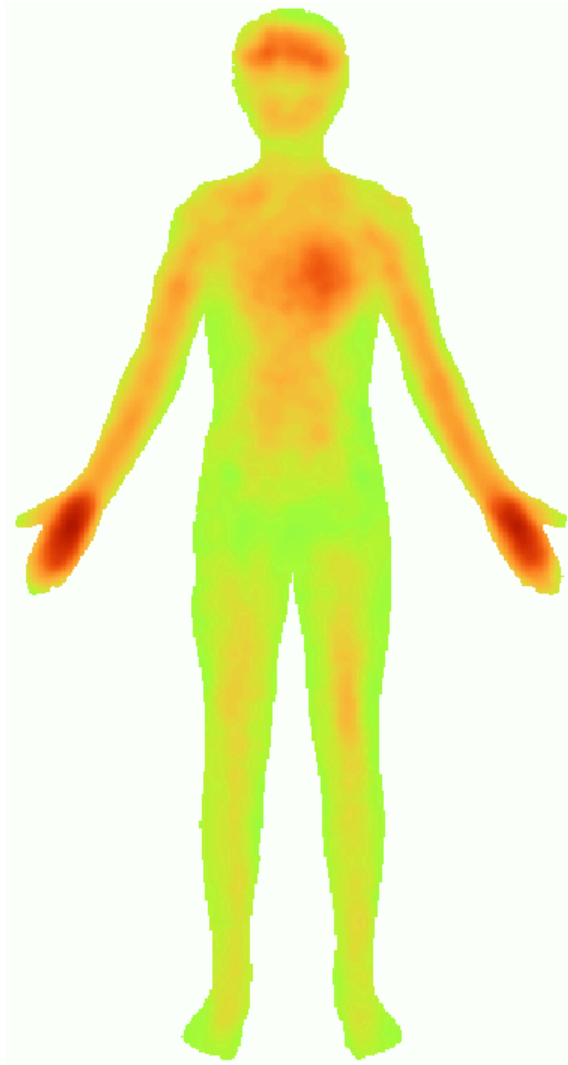

- 1) shame
- 2) terror
- 3) love
- 4) fury
- 5) aggressiveness

**activation**



03. Which mental state does this bodily map depict?

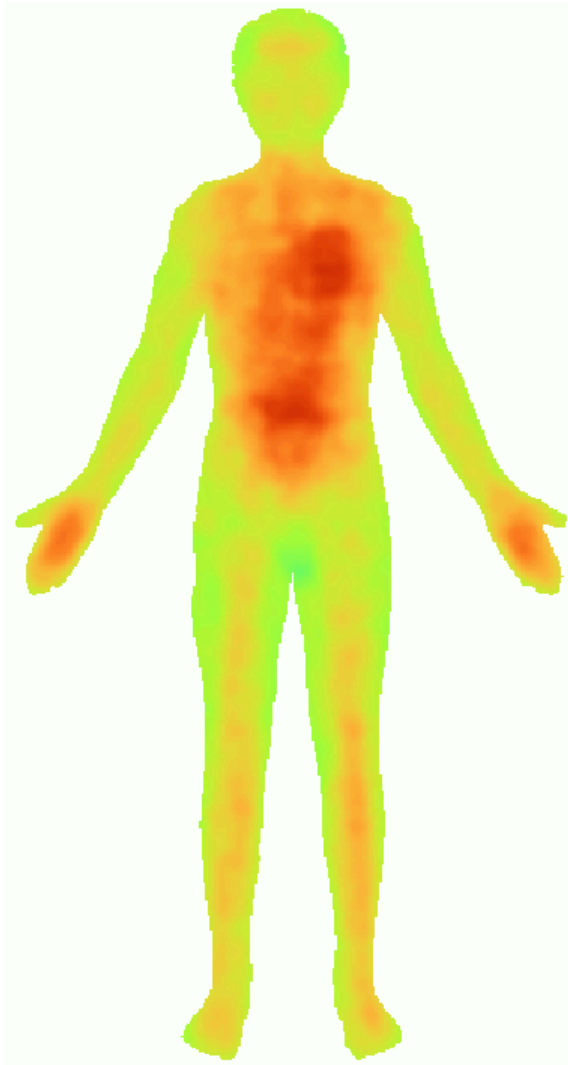

- 1) astonishment
- 2) anxiety
- 3) aggressiveness
- 4) agitation
- 5) chastity

**activation**



04. Which mental state does this bodily map depict?

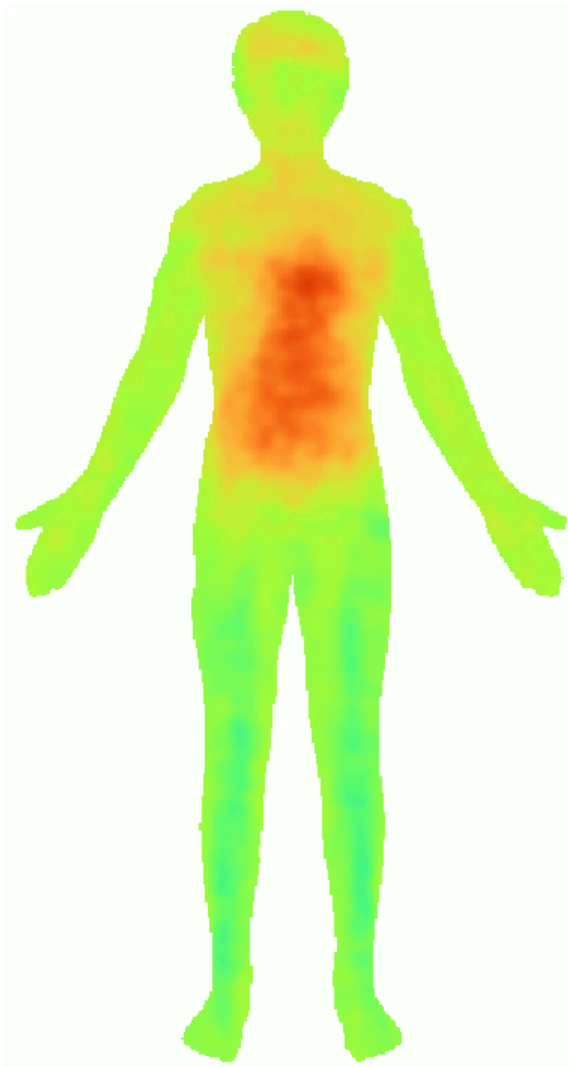

- 1) affection
- 2) happiness
- 3) agony
- 4) astonishment
- 5) cruelty

**activation**



05. Which mental state does this bodily map depict?

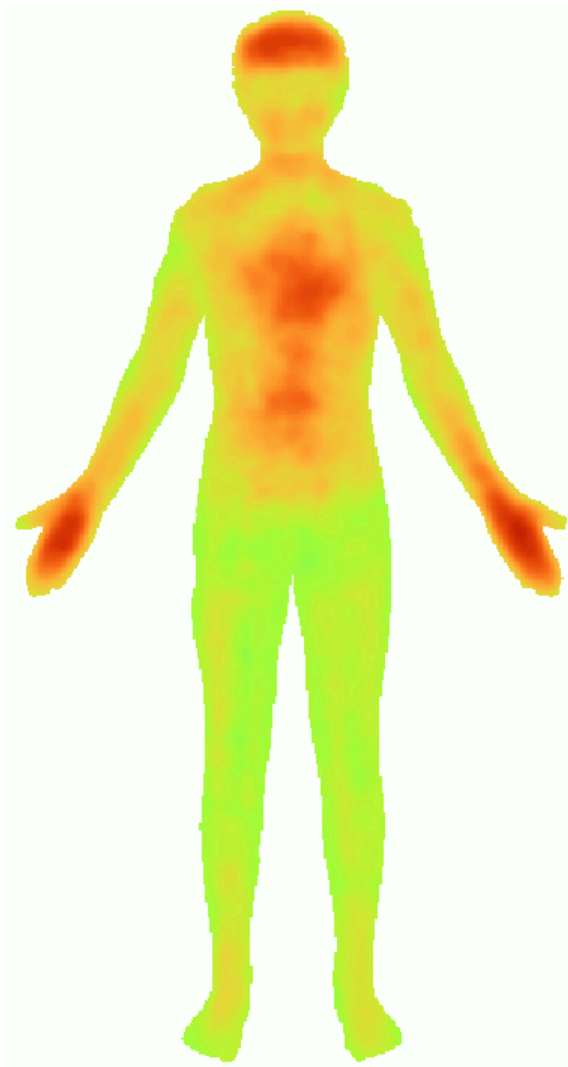

- 1) nervousness
- 2) contempt
- 3) gratitude
- 4) anger
- 5) uncertainty

**activation**



06. Which mental state does this bodily map depict?

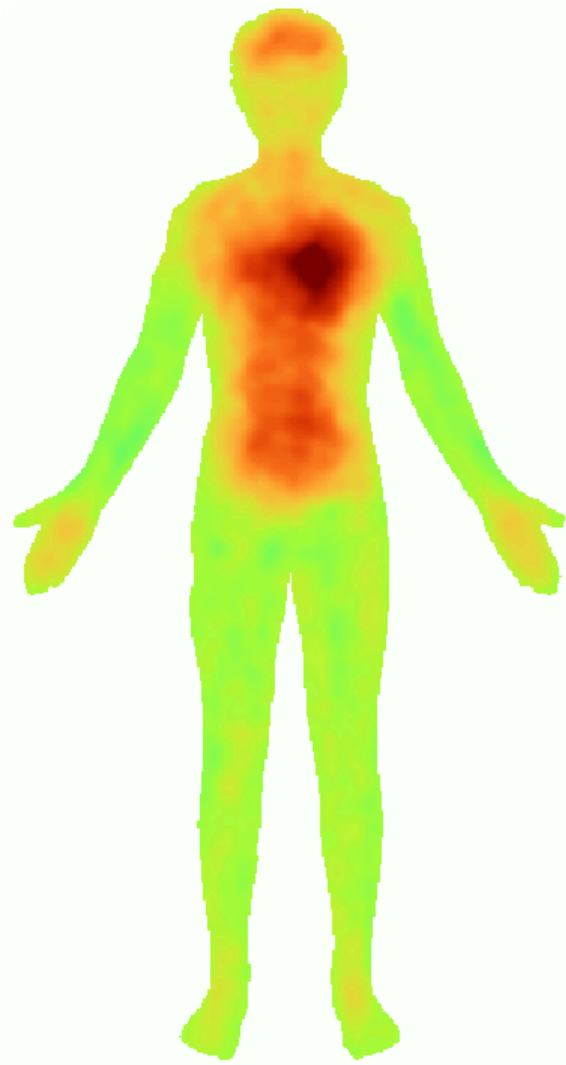

- 1) impatience
- 2) anxiety
- 3) nervousness
- 4) breathlessness
- 5) affection

**activation**



07. Which mental state does this bodily map depict?

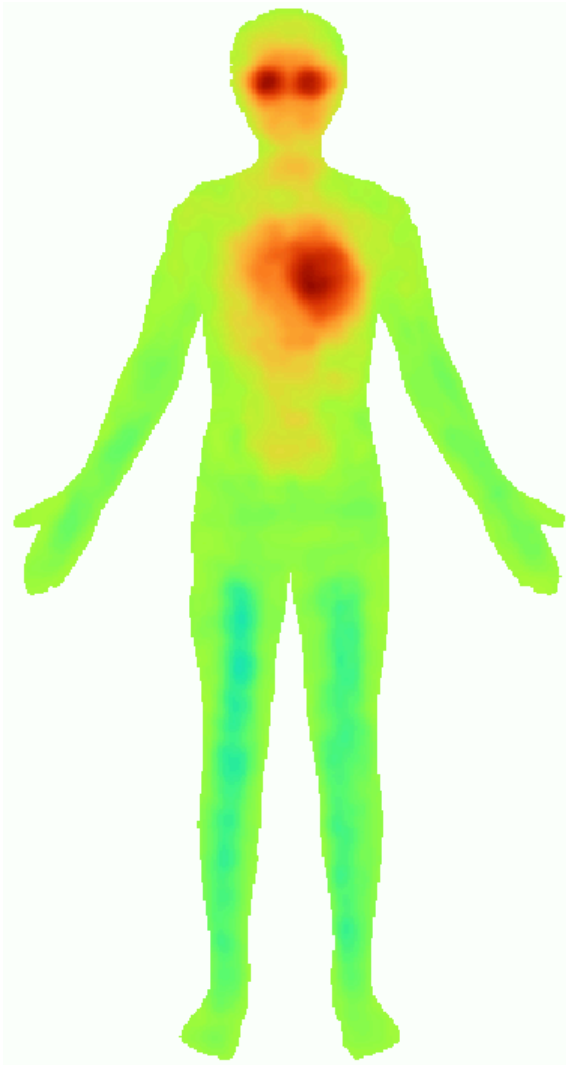

activation

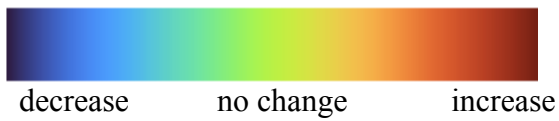

- 1) being touched
- 2) humiliation
- 3) breathlessness
- 4) disappointment
- 5) sleepiness

08. Which mental state does this bodily map depict?

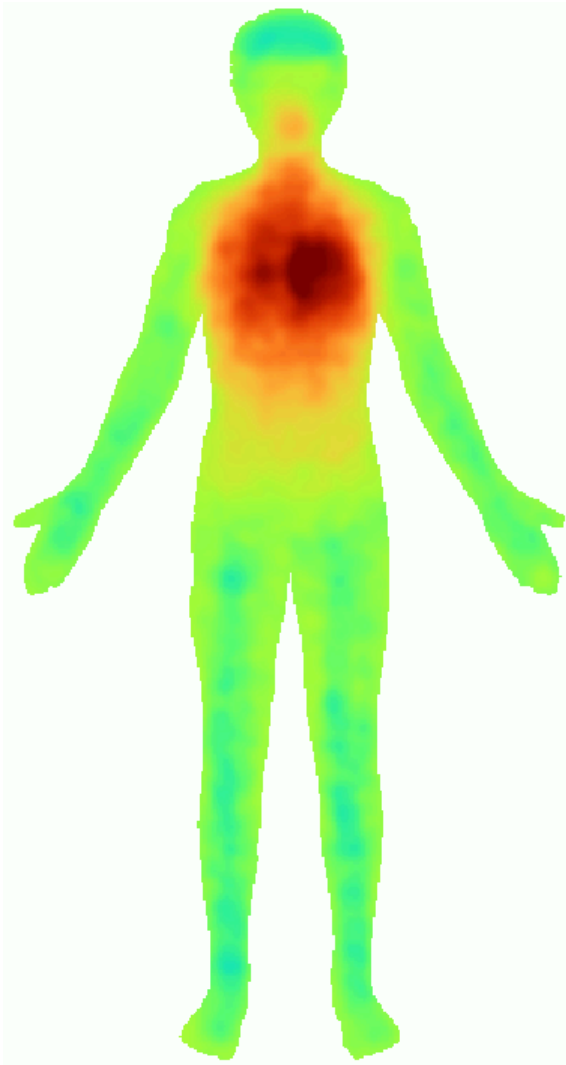

- 1) confusion
- 2) love
- 3) agitation
- 4) trust
- 5) breathlessness

**activation**

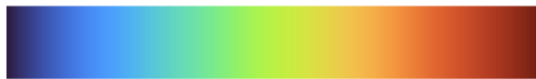

decrease

no change

increase

09. Which mental state does this bodily map depict?

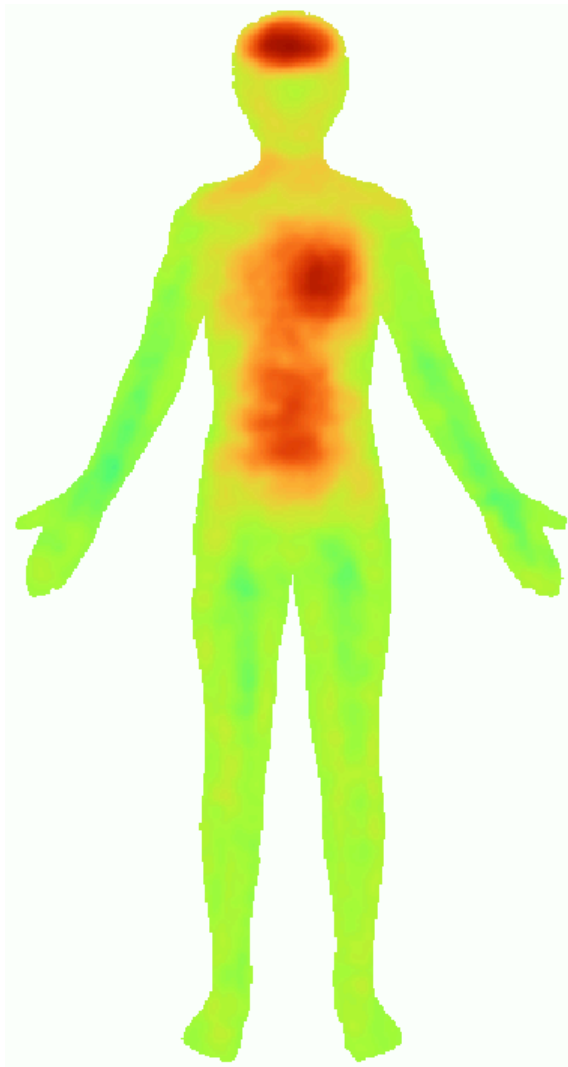

- 1) joy
- 2) ecstasy
- 3) concern
- 4) disgust
- 5) nervousness

**activation**



10. Which mental state does this bodily map depict?

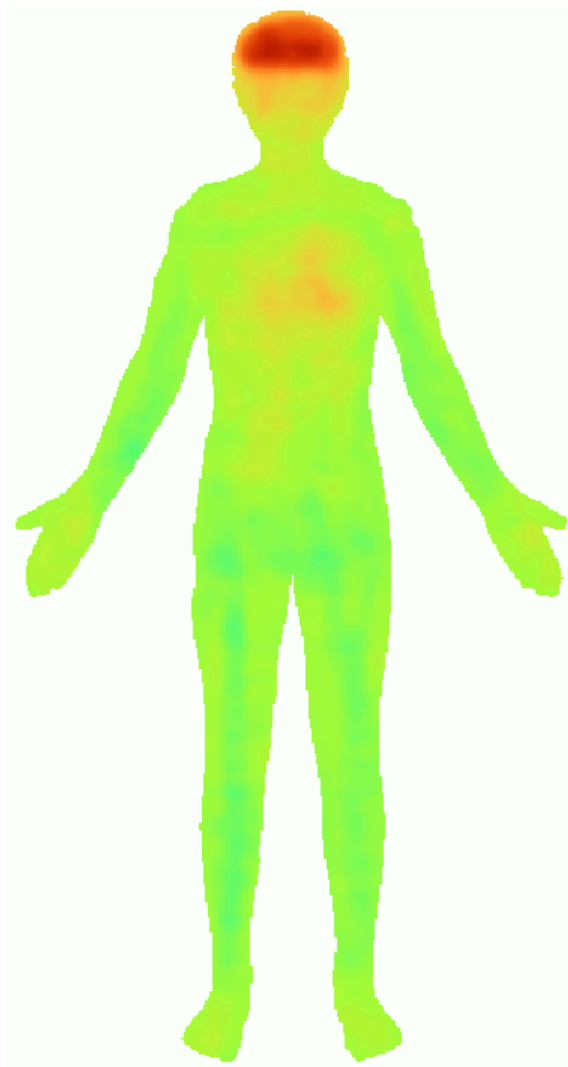

- 1) confusion
- 2) dissatisfaction
- 3) agitation
- 4) breathlessness
- 5) fear

**activation**



11. Which mental state does this bodily map depict?

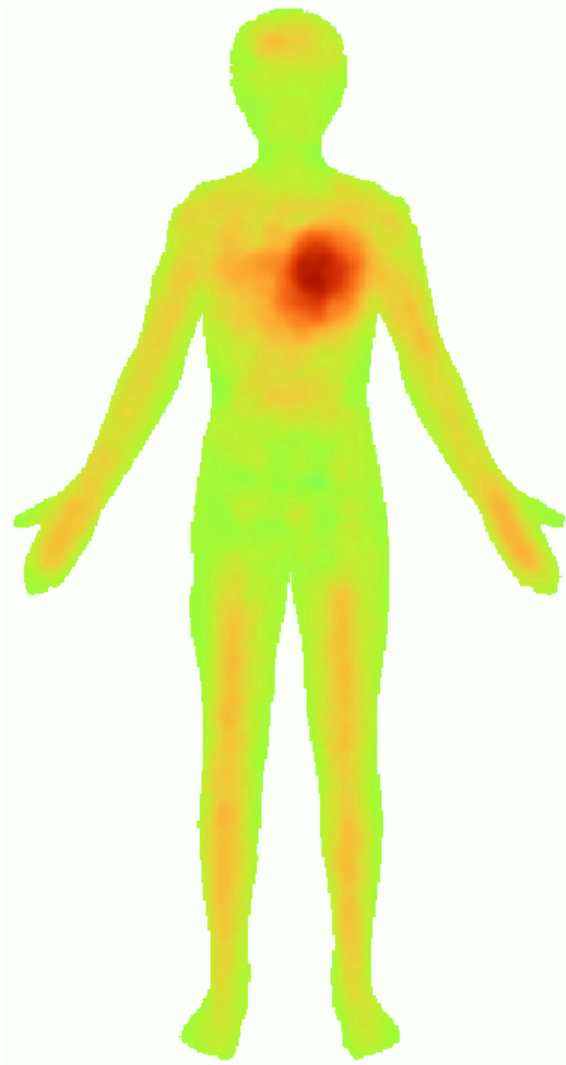

- 1) joy
- 2) courage
- 3) affection
- 4) ecstasy
- 5) terror

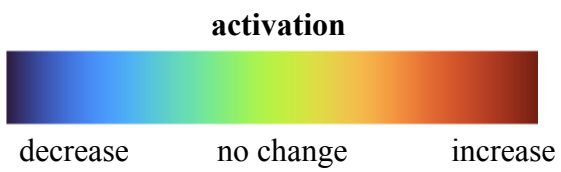

12. Which mental state does this bodily map depict?

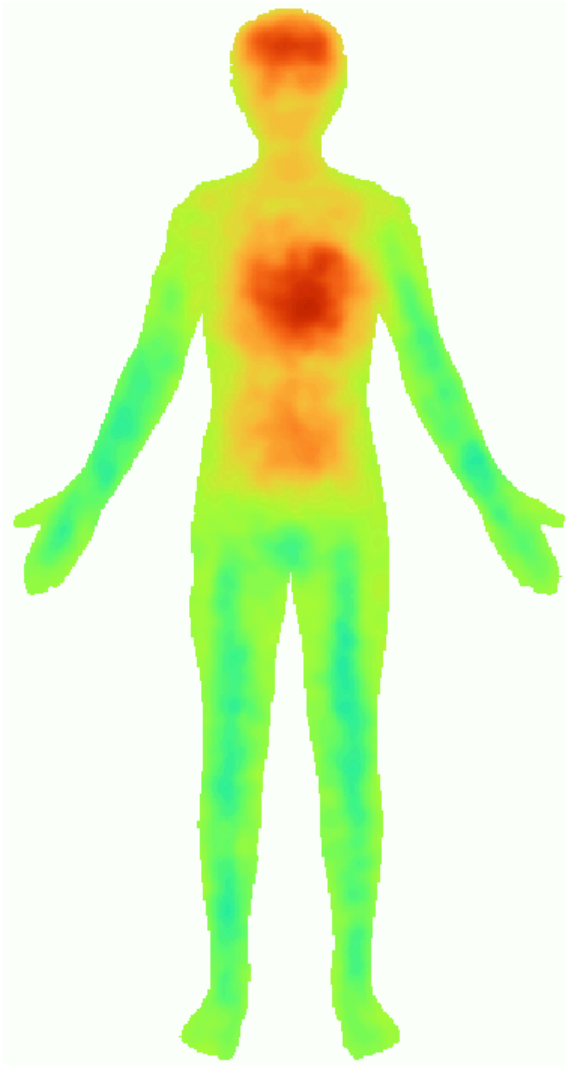

- 1) pride
- 2) sexual pleasure
- 3) affection
- 4) despair
- 5) stress

**activation**



13. Which mental state does this bodily map depict?

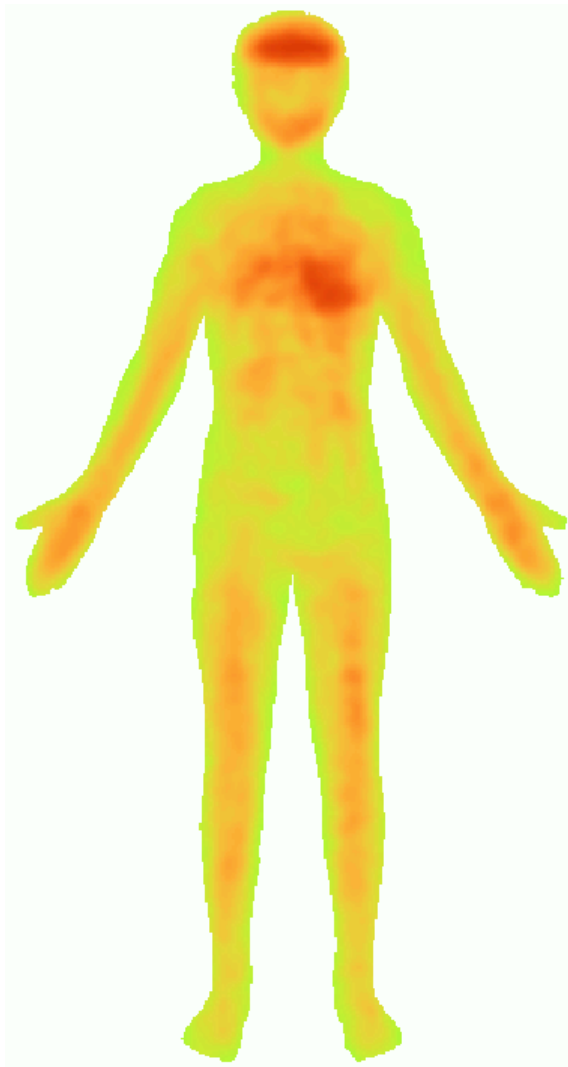

- 1) love
- 2) disgust
- 3) amusement
- 4) stress
- 5) elation

**activation**



14. Which mental state does this bodily map depict?

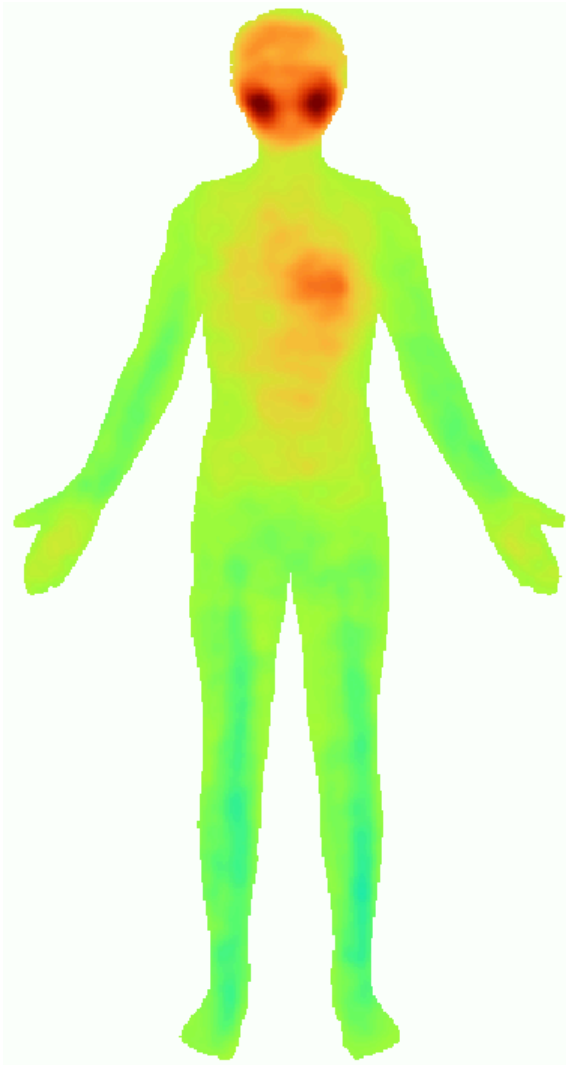

**activation**



- 1) skepticism
- 2) fury
- 3) embarrassment
- 4) affection
- 5) ecstasy

15. Which mental state does this bodily map depict?

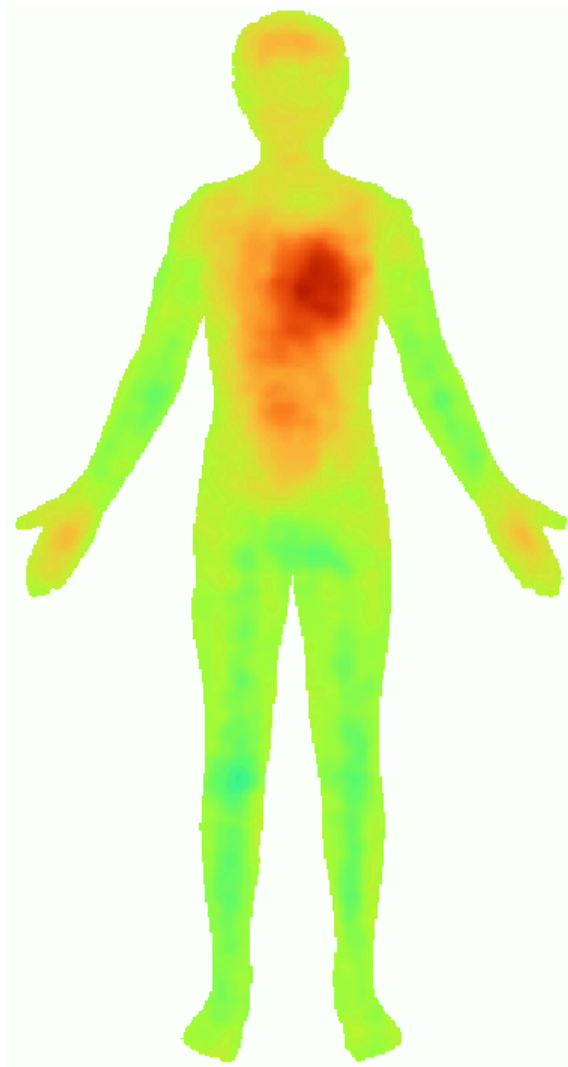

- 1) contempt
- 2) being touched
- 3) panic
- 4) breathlessness
- 5) fear

**activation**

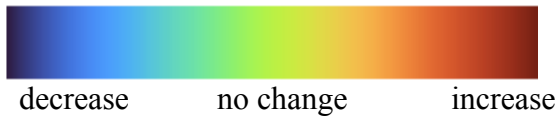

16. Which mental state does this bodily map depict?

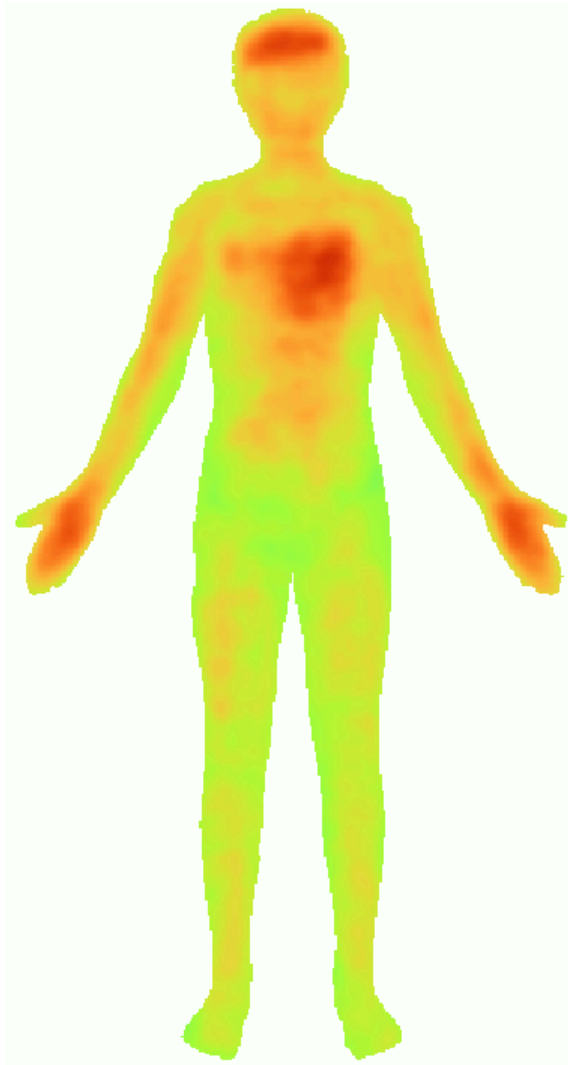

- 1) fury
- 2) egotism
- 3) fear
- 4) agitation
- 5) contempt

**activation**



17. Which mental state does this bodily map depict?

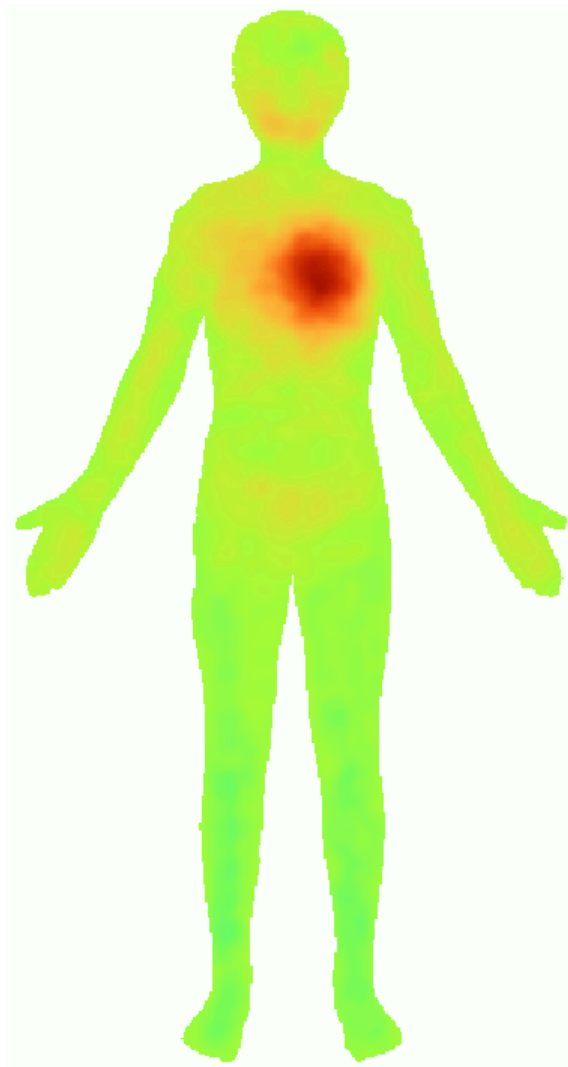

- 1) breathlessness
- 2) agitation
- 3) gratitude
- 4) happiness
- 5) compassion

**activation**



18. Which mental state does this bodily map depict?

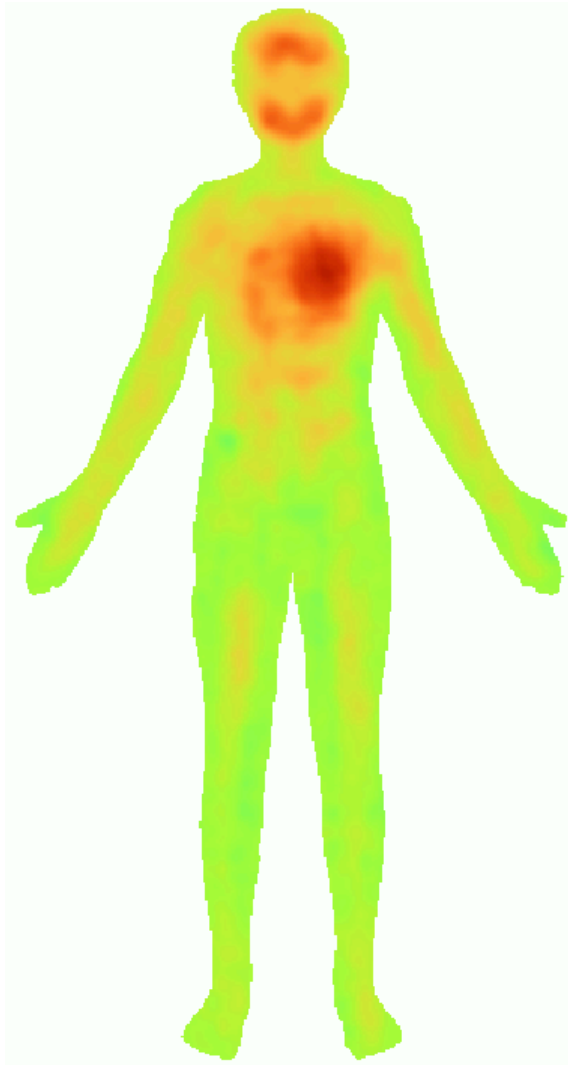

- 1) happiness
- 2) elation
- 3) sexual pleasure
- 4) respect
- 5) agitation

**activation**



decrease

no change

increase

19. Which mental state does this bodily map depict?

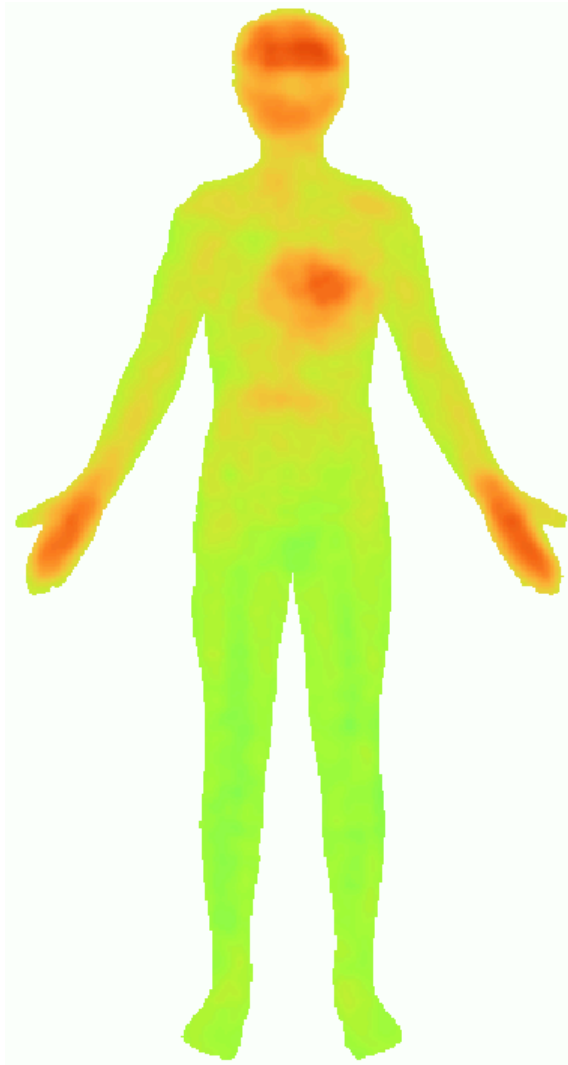

- 1) envy
- 2) hate
- 3) aggressiveness
- 4) breathlessness
- 5) gratitude

**activation**



20. Which mental state does this bodily map depict?

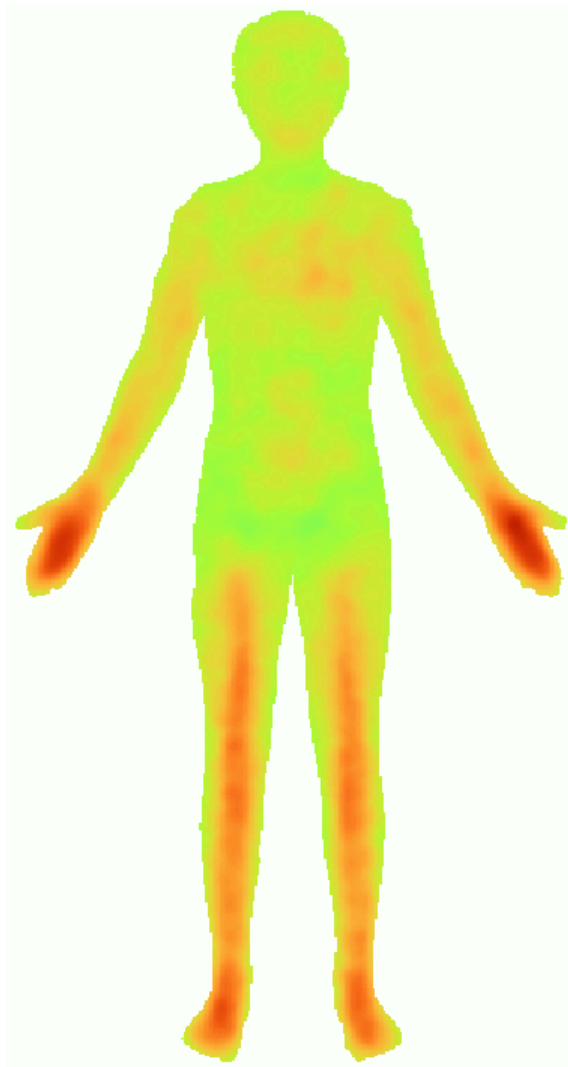

- 1) generosity
- 2) tiredness
- 3) impatience
- 4) jealousy
- 5) relief

**activation**



21. Which mental state does this bodily map depict?

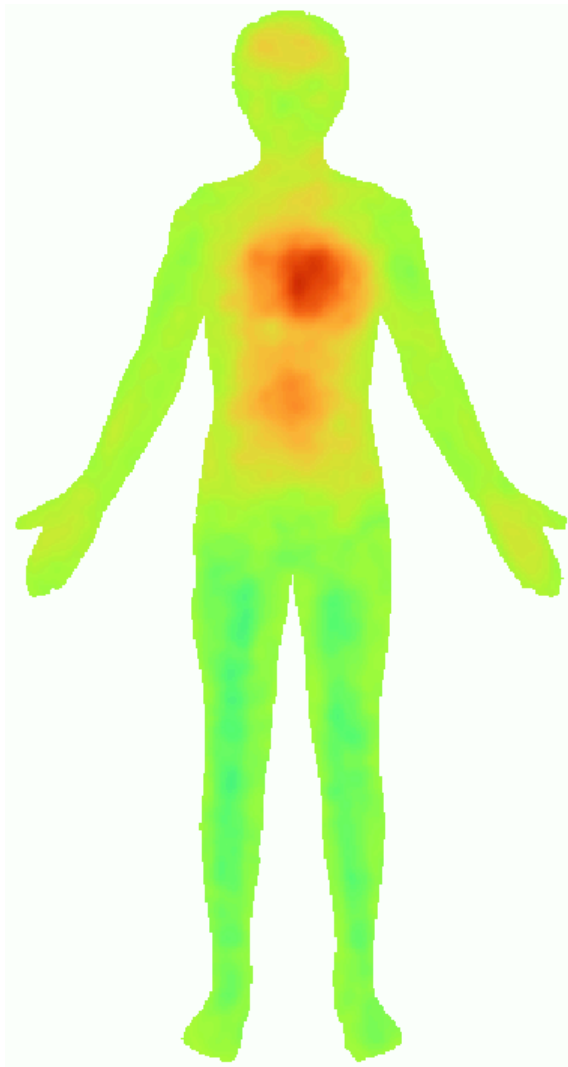

**activation**



- 1) being touched
- 2) happiness
- 3) jealousy
- 4) disgust
- 5) agitation

22. Which mental state does this bodily map depict?

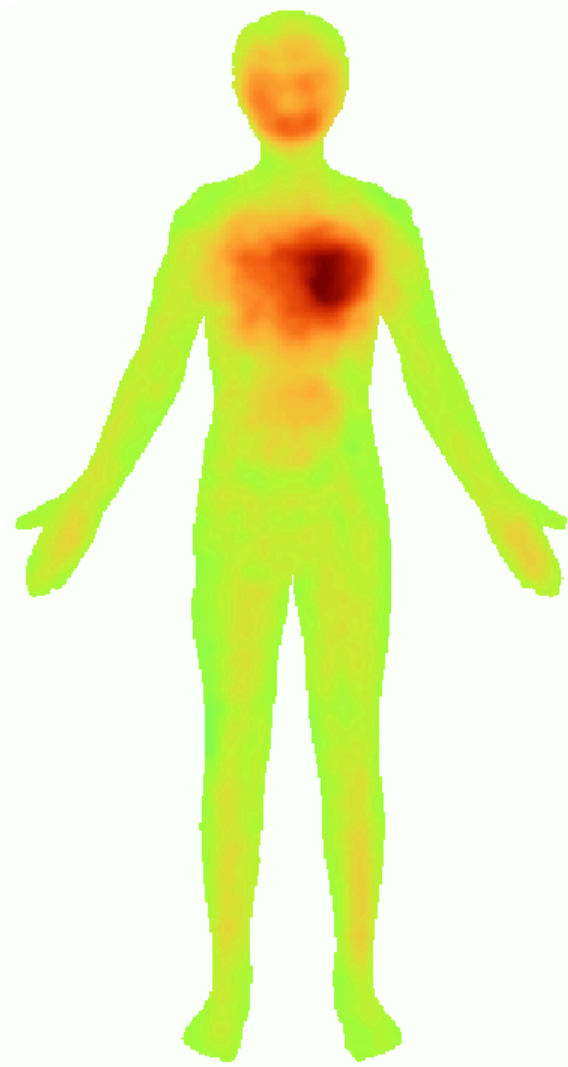

- 1) concern
- 2) lust
- 3) joy
- 4) love
- 5) elation

**activation**



23. Which mental state does this bodily map depict?

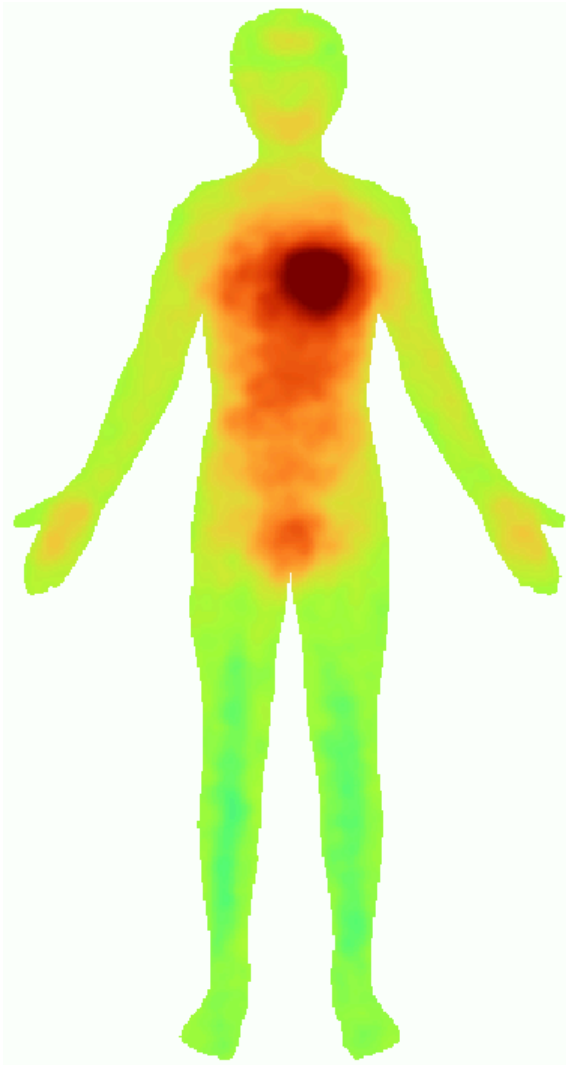

- 1) anxiety
- 2) love
- 3) confusion
- 4) amusement
- 5) surprise

**activation**

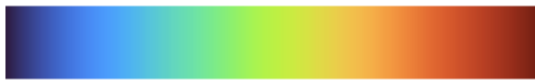

decrease

no change

increase

24. Which mental state does this bodily map depict?

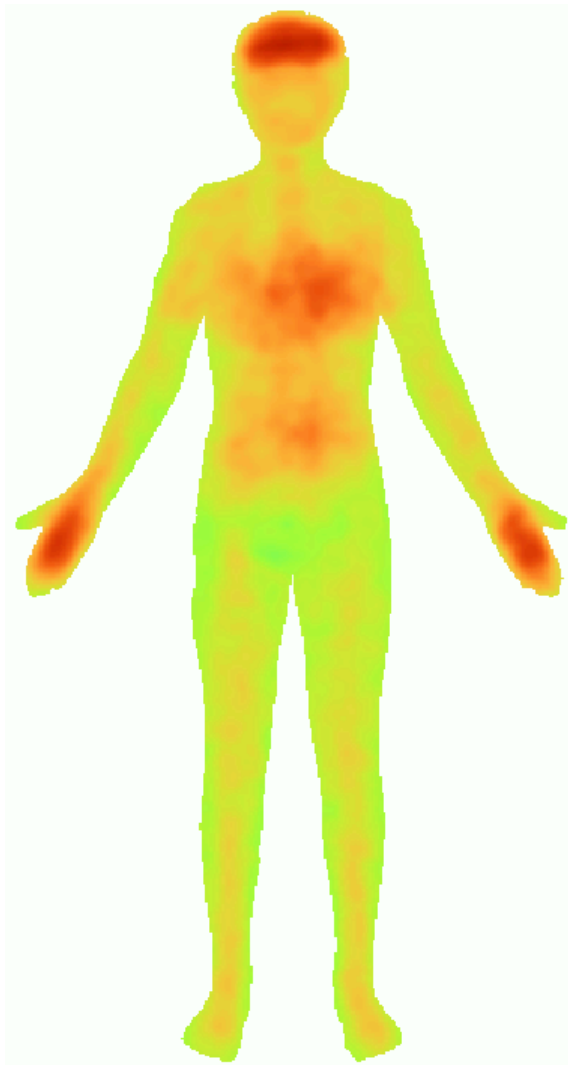

- 1) sexual pleasure
- 2) hate
- 3) nervousness
- 4) breathlessness
- 5) anger

**activation**



25. Which mental state does this bodily map depict?

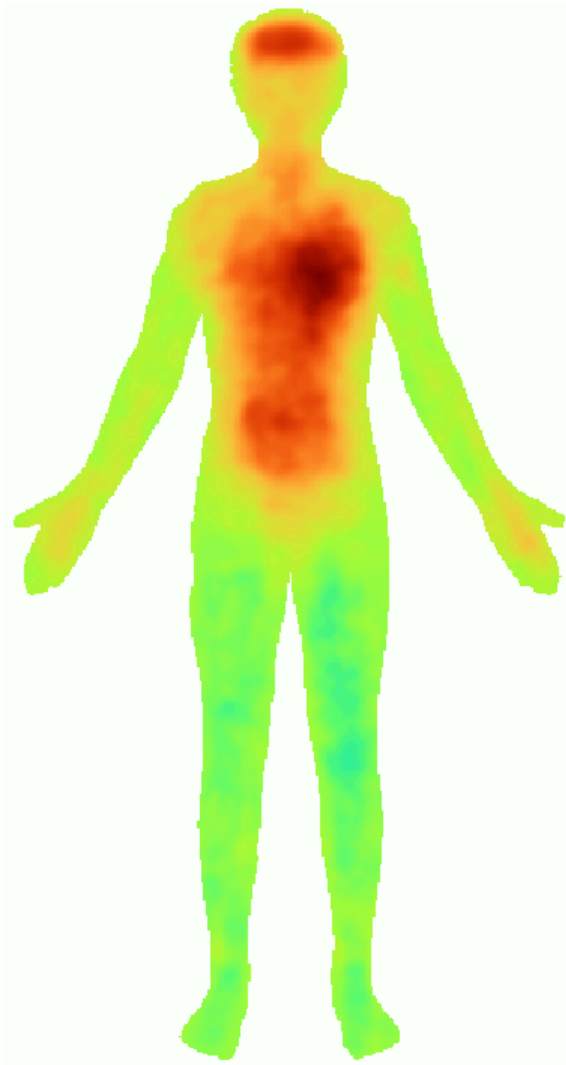

**activation**



- 1) concern
- 2) fury
- 3) panic
- 4) being touched
- 5) affection

26. Which mental state does this bodily map depict?

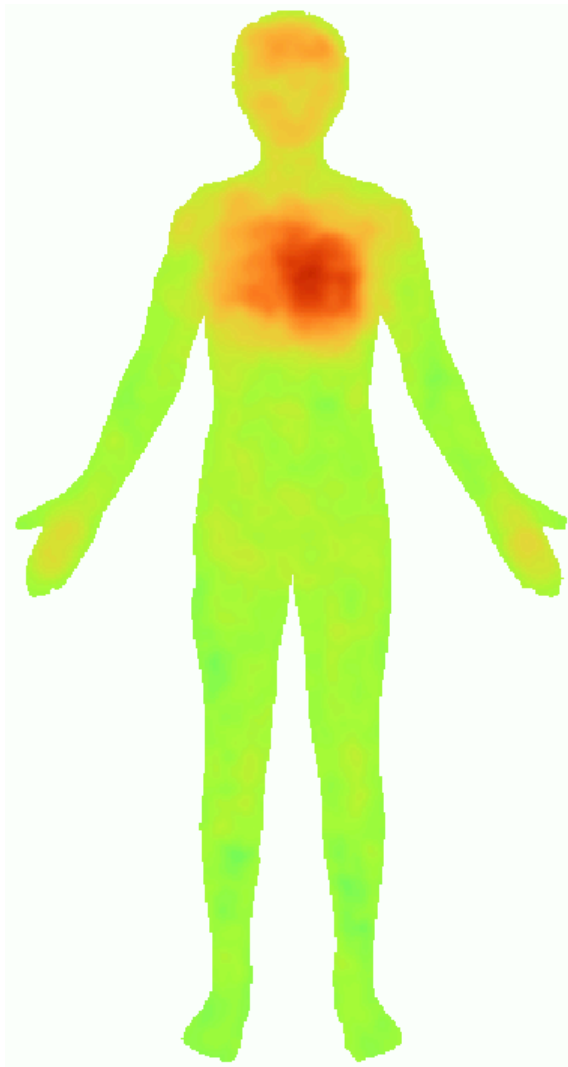

- 1) egotism
- 2) happiness
- 3) pride
- 4) confusion
- 5) concern

**activation**



27. Which mental state does this bodily map depict?

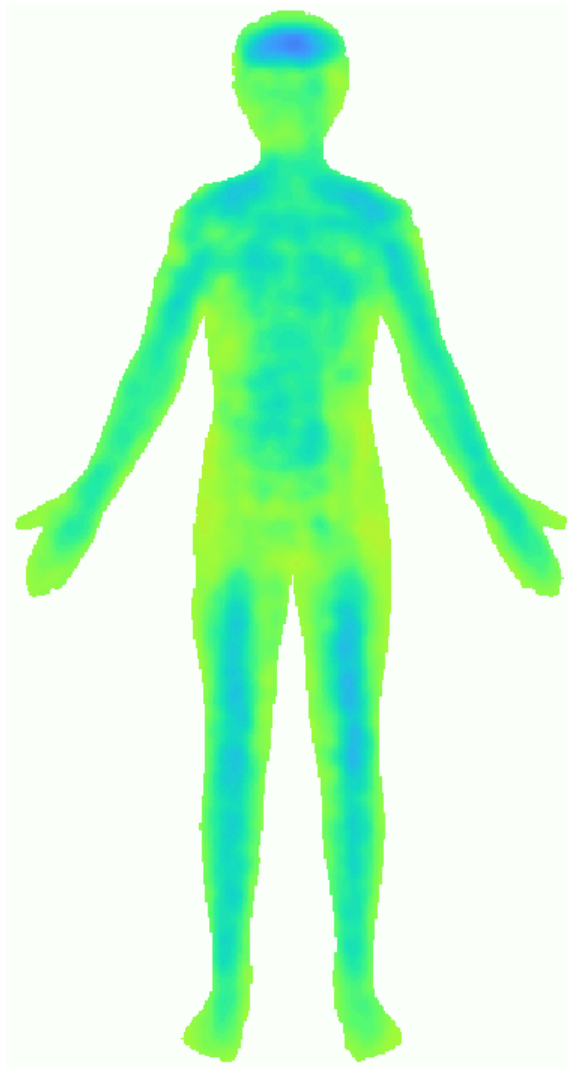

**activation**



- 1) carelessness
- 2) relaxation
- 3) anger
- 4) confusion
- 5) ecstasy

28. Which mental state does this bodily map depict?

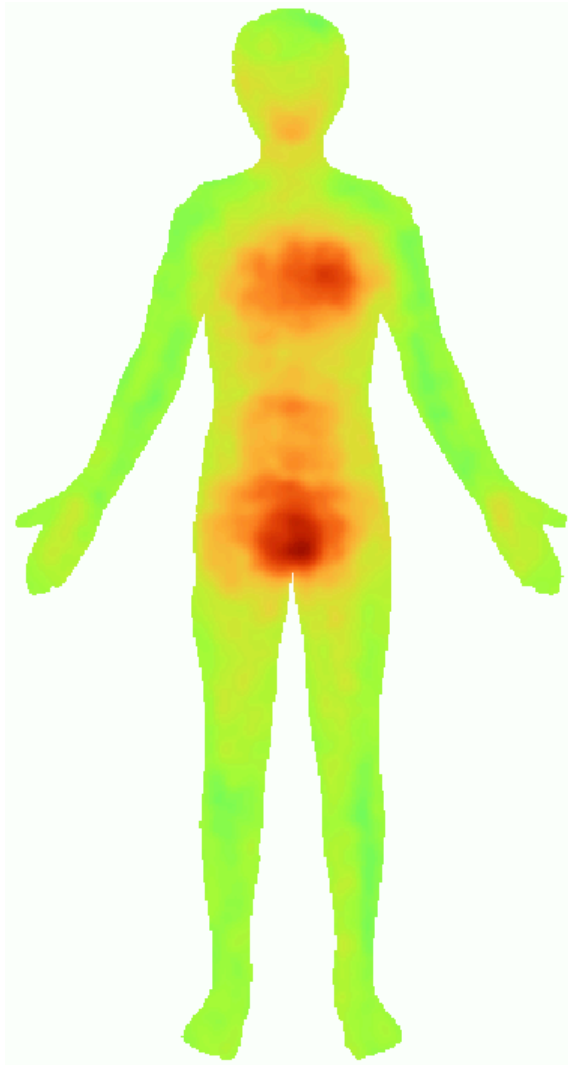

**activation**



- 1) chastity
- 2) terror
- 3) ecstasy
- 4) amusement
- 5) sexual pleasure

29. Which mental state does this bodily map depict?

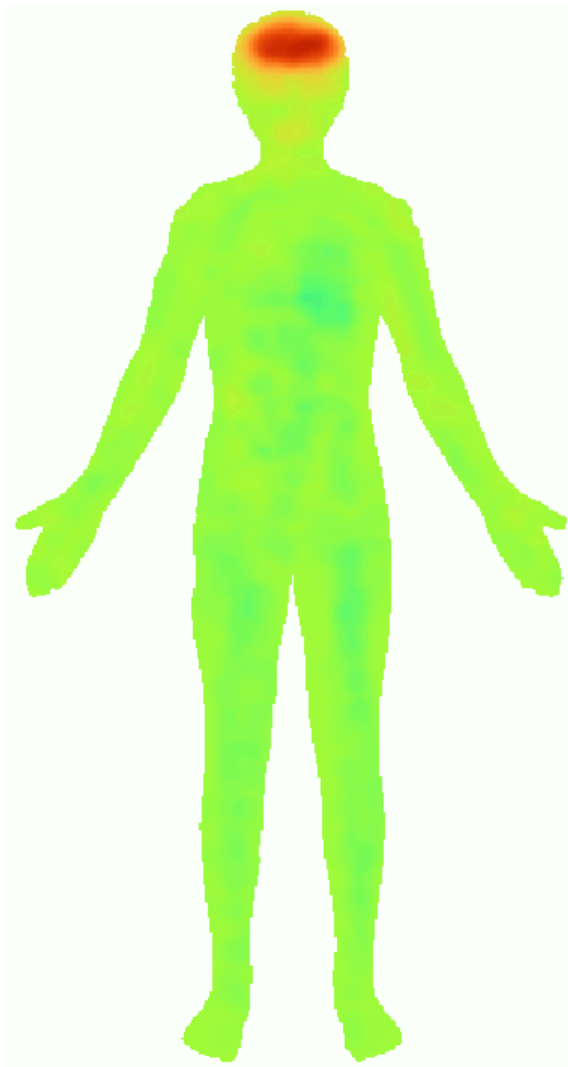

**activation**



- 1) despair
- 2) skepticism
- 3) amusement
- 4) breathlessness
- 5) uncertainty

30. Which mental state does this bodily map depict?

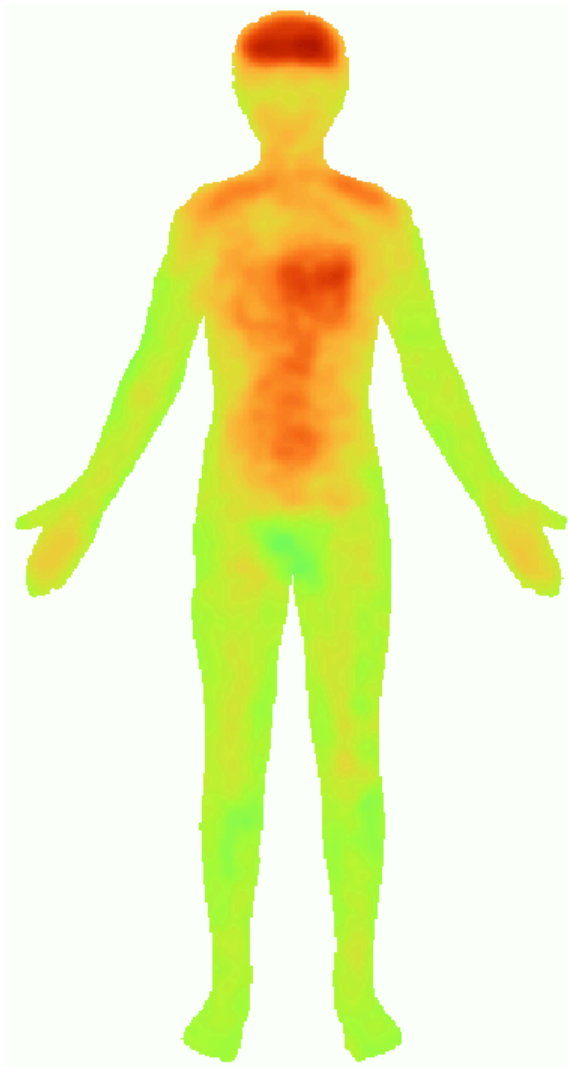

- 1) envy
- 2) stress
- 3) contempt
- 4) elation
- 5) disgust

**activation**



31. Which mental state does this bodily map depict?

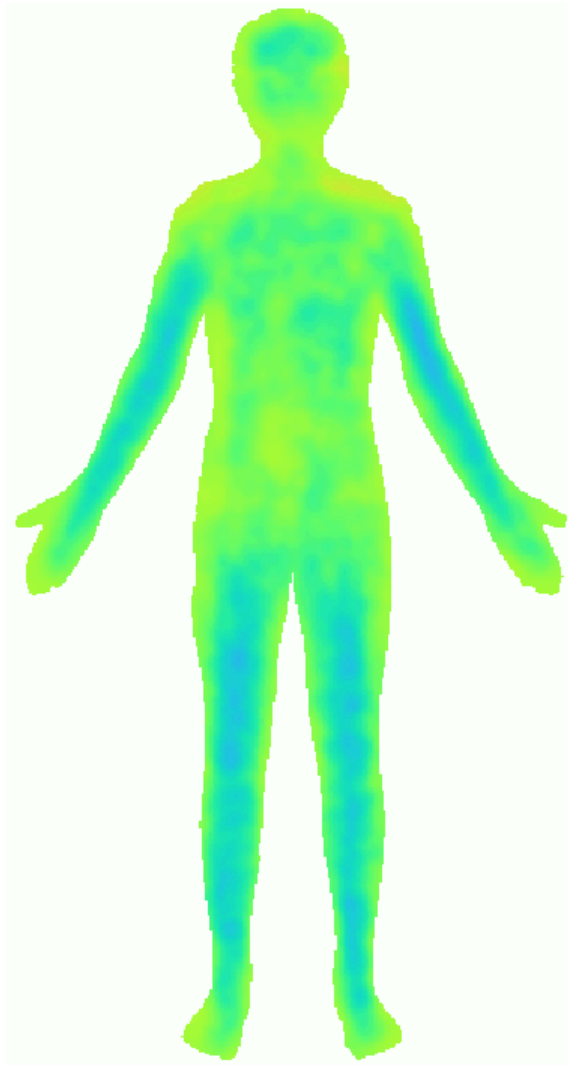

- 1) relief
- 2) sexual pleasure
- 3) anxiety
- 4) tiredness
- 5) love

**activation**



32. Which mental state does this bodily map depict?

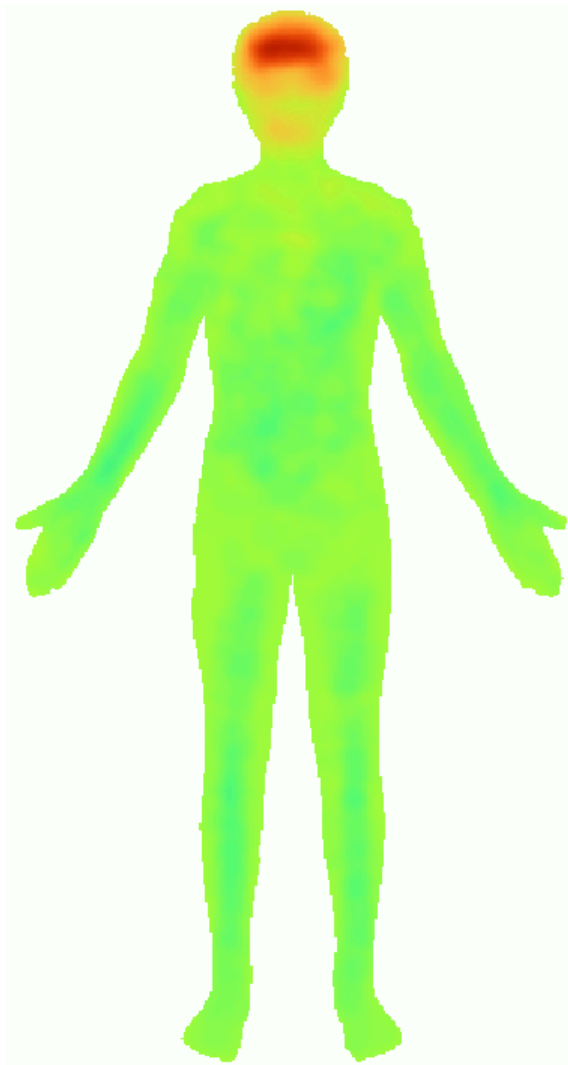

**activation**



- 1) despair
- 2) carelessness
- 3) uncertainty
- 4) being touched
- 5) stress

---
