# Supplementary material
Source: Research Square preprint supplement (doi:10.21203/rs.3.rs-9402989/v1)
Supplement: Supplementary file 6 [file aa063039aaecf5f563076252.pdf]

| <b>BSMs</b>     | <b>micro-accuracy</b> | <b>SD</b> |
|-----------------|-----------------------|-----------|
| horror          | 0.049                 | 0.209     |
| cruelty         | 0.073                 | 0.262     |
| terror          | 0.161                 | 0.365     |
| contempt        | 0.182                 | 0.387     |
| egotism         | 0.189                 | 0.393     |
| agony           | 0.231                 | 0.423     |
| envy            | 0.252                 | 0.435     |
| hate            | 0.259                 | 0.439     |
| generosity      | 0.280                 | 0.450     |
| affection       | 0.287                 | 0.453     |
| pride           | 0.294                 | 0.457     |
| despair         | 0.297                 | 0.457     |
| gratitude       | 0.308                 | 0.463     |
| satisfaction    | 0.308                 | 0.463     |
| astonishment    | 0.315                 | 0.466     |
| chastity        | 0.318                 | 0.467     |
| disappointment  | 0.318                 | 0.467     |
| surprise        | 0.325                 | 0.470     |
| dissatisfaction | 0.329                 | 0.471     |
| caution         | 0.339                 | 0.475     |
| fear            | 0.343                 | 0.476     |
| jealousy        | 0.346                 | 0.477     |
| amusement       | 0.357                 | 0.480     |
| nostalgia       | 0.367                 | 0.483     |
| joy             | 0.378                 | 0.486     |
| sadness         | 0.378                 | 0.486     |
| lust            | 0.385                 | 0.488     |
| skepticism      | 0.388                 | 0.488     |
| ecstasy         | 0.399                 | 0.491     |
| happiness       | 0.406                 | 0.492     |
| trust           | 0.406                 | 0.492     |
| humbleness      | 0.409                 | 0.493     |
| courage         | 0.416                 | 0.494     |
| respect         | 0.420                 | 0.495     |
| fury            | 0.427                 | 0.495     |
| humiliation     | 0.427                 | 0.496     |
| hope            | 0.430                 | 0.496     |
| uncertainty     | 0.441                 | 0.498     |
| compassion      | 0.472                 | 0.500     |
| elation         | 0.479                 | 0.501     |
| guilt           | 0.479                 | 0.501     |
| concern         | 0.500                 | 0.501     |
| breathlessness  | 0.503                 | 0.501     |
| carelessness    | 0.521                 | 0.500     |
| being touched   | 0.528                 | 0.500     |
| anxiety         | 0.531                 | 0.500     |
| panic           | 0.545                 | 0.499     |
| stress          | 0.549                 | 0.498     |
| disgust         | 0.552                 | 0.498     |
| confusion       | 0.566                 | 0.496     |
| relief          | 0.580                 | 0.494     |
| aggressiveness  | 0.605                 | 0.489     |
| nervousness     | 0.619                 | 0.486     |
| agitation       | 0.629                 | 0.483     |
| anger           | 0.636                 | 0.482     |
| tiredness       | 0.643                 | 0.479     |
| impatience      | 0.650                 | 0.478     |
| sleepiness      | 0.650                 | 0.477     |
| love            | 0.657                 | 0.475     |
| shame           | 0.706                 | 0.455     |
| indifference    | 0.720                 | 0.448     |
| relaxation      | 0.720                 | 0.448     |
| embarrassment   | 0.748                 | 0.433     |
| pleasure        | 0.832                 | 0.372     |
| sexual pleasure | 0.836                 | 0.369     |
