# Supplementary material
Source: Research Square preprint supplement (doi:10.21203/rs.3.rs-9402989/v1)
Supplement: Supplementary file 7 [file cac887a8a77b9b94cd8f4639.pdf]

| mental state    | ValencePos | ValenceNeg | ValenceDiff | Bodily Salience | Visibility |
|-----------------|------------|------------|-------------|-----------------|------------|
| agony           | 1.5        | 6.5        | -5.0        | 5.6             | 5.4        |
| despair         | 1.5        | 6.5        | -5.0        | 5.8             | 5.5        |
| humiliation     | 1.5        | 6.5        | -5.0        | 5.1             | 4.9        |
| panic           | 1.5        | 6.5        | -5.0        | 5.9             | 5.7        |
| shame           | 1.4        | 6.4        | -5.0        | 5.9             | 5.8        |
| disgust         | 1.5        | 6.4        | -4.9        | 6.0             | 5.9        |
| guilt           | 1.5        | 6.4        | -4.9        | 5.1             | 4.6        |
| terror          | 1.7        | 6.5        | -4.8        | 6.1             | 5.8        |
| disappointment  | 1.6        | 6.3        | -4.7        | 4.6             | 4.9        |
| anxiety         | 1.6        | 6.1        | -4.5        | 5.9             | 5.5        |
| fear            | 1.6        | 6.1        | -4.5        | 5.9             | 5.5        |
| horror          | 1.6        | 6.1        | -4.5        | 5.6             | 5.6        |
| sadness         | 1.8        | 6.3        | -4.5        | 5.3             | 5.4        |
| dissatisfaction | 1.7        | 6.1        | -4.4        | 4.4             | 4.6        |
| fury            | 1.7        | 6.0        | -4.3        | 5.8             | 6.0        |
| nervousness     | 1.8        | 6.0        | -4.2        | 5.6             | 5.8        |
| jealousy        | 1.8        | 5.9        | -4.1        | 5.4             | 5.3        |
| agitation       | 1.9        | 6.0        | -4.1        | 6.0             | 5.7        |
| concern         | 1.9        | 6.0        | -4.1        | 5.1             | 4.9        |
| stress          | 2.0        | 5.9        | -3.9        | 5.7             | 5.5        |
| anger           | 1.9        | 5.8        | -3.9        | 5.8             | 5.8        |
| envy            | 1.9        | 5.8        | -3.9        | 4.3             | 4.6        |
| hate            | 2.1        | 5.7        | -3.6        | 5.5             | 5.4        |
| breathlessness  | 2.0        | 5.5        | -3.5        | 6.0             | 5.5        |
| embarrassment   | 2.1        | 5.6        | -3.5        | 5.6             | 5.2        |
| contempt        | 2.1        | 5.5        | -3.4        | 4.7             | 4.9        |
| cruelty         | 2.4        | 5.8        | -3.4        | 5.7             | 5.6        |
| confusion       | 2.2        | 5.3        | -3.1        | 4.6             | 4.7        |
| aggressiveness  | 2.4        | 5.3        | -2.9        | 5.7             | 5.8        |
| tiredness       | 2.5        | 5.1        | -2.6        | 5.7             | 5.7        |
| impatience      | 3.0        | 4.4        | -1.4        | 5.6             | 5.6        |
| uncertainty     | 2.9        | 4.3        | -1.4        | 3.9             | 4.8        |
| sleepiness      | 3.1        | 4.1        | -1.0        | 6.0             | 5.6        |
| egotism         | 3.7        | 4.4        | -0.7        | 4.1             | 5.3        |
| indifference    | 3.2        | 3.9        | -0.7        | 3.8             | 4.8        |
| nostalgia       | 3.6        | 4.0        | -0.4        | 5.0             | 4.0        |
| carelessness    | 3.5        | 3.9        | -0.4        | 3.4             | 5.1        |
| skepticism      | 3.3        | 3.6        | -0.3        | 3.6             | 5.1        |
| chastity        | 4.0        | 4.3        | -0.3        | 5.3             | 3.9        |
| astonishment    | 4.3        | 3.5        | 0.8         | 5.5             | 5.9        |
| caution         | 4.0        | 2.9        | 1.1         | 4.0             | 5.0        |
| compassion      | 4.3        | 3.1        | 1.2         | 4.0             | 5.0        |
| surprise        | 4.6        | 3.3        | 1.3         | 5.6             | 5.6        |
| humbleness      | 4.5        | 2.7        | 1.8         | 3.4             | 4.6        |
| lust            | 4.6        | 2.8        | 1.8         | 5.0             | 4.5        |
| being touched   | 4.9        | 2.7        | 2.2         | 5.7             | 5.9        |
| respect         | 5.3        | 2.1        | 3.2         | 3.6             | 5.1        |
| pride           | 5.5        | 2.2        | 3.3         | 4.6             | 5.2        |
| courage         | 5.5        | 2.1        | 3.4         | 5.1             | 4.9        |
| hope            | 5.5        | 2.1        | 3.4         | 4.4             | 4.3        |
| affection       | 6.0        | 2.0        | 4.0         | 6.0             | 5.6        |
| gratitude       | 6.0        | 2.0        | 4.0         | 4.6             | 5.0        |
| elation         | 6.1        | 2.0        | 4.1         | 5.6             | 5.8        |
| relaxation      | 6.1        | 2.0        | 4.1         | 5.3             | 5.5        |
| love            | 6.1        | 1.8        | 4.3         | 6.2             | 5.6        |
| trust           | 6.0        | 1.7        | 4.3         | 4.5             | 5.0        |
| relief          | 6.1        | 1.7        | 4.4         | 5.3             | 5.3        |
| ecstasy         | 6.3        | 1.9        | 4.4         | 6.0             | 5.4        |
| generosity      | 6.0        | 1.6        | 4.4         | 4.9             | 5.8        |
| satisfaction    | 6.3        | 1.7        | 4.6         | 4.5             | 5.2        |
| pleasure        | 6.4        | 1.8        | 4.6         | 5.9             | 5.6        |
| amusement       | 6.3        | 1.6        | 4.7         | 5.6             | 6.0        |
| happiness       | 6.5        | 1.7        | 4.8         | 5.7             | 5.8        |
| joy             | 6.4        | 1.6        | 4.8         | 5.6             | 5.9        |
| sexual pleasure | 6.5        | 1.5        | 5.0         | 5.9             | 5.6        |

**Legend**

|    |                                       |
|----|---------------------------------------|
| 25 | positive-valenced mental states       |
| 32 | negative-valenced mental states       |
| 8  | neutral/no clear valence polarization |
